# Supplementary material for: Climate and disease in historical urban space: evidence from 19th century Poznań, Poland
Source: Copernicus journal article supplement (doi:10.5194/cp-20-137-2024), 2024-01-17
Supplement: Supplementary file 1 [file cp-20-137-2024-supplement.zip]

**Table S1** Values of Infant Mortality Rates in Poznań

| Period    | Infant Mortality Rates (per 1,000 live births) |
|-----------|------------------------------------------------|
| 1850–1874 | 315.03*                                        |
| 1875–1884 | 280.40**                                       |
| 1885–1894 | 261.80**                                       |
| 1895–1904 | 199.90**                                       |
| 1905–1913 | 171.05**                                       |

\*authors' calculations based on data derived from Poznań parish birth and death books for years 1850–1874.

\*\*authors' calculations based on data derived from Prussian Statistical Yearbooks (Preussische Statistik. Die Bewegung der Bevölkerung. Die Geburten, Eheschliessungen und Sterbefälle. Herausgegeben in zwanglosen Heften vom Königl. Preussischen Statistischen Bureau in Berlin. XLII–XLII–MMXLV, 1875–1913).

**Table S2** Values of life expectancy at birth ( $e_0$ ) in Poznań

| Period    | $e_0$ (in years) |
|-----------|------------------|
| 1850–1874 | 27.81*           |
| 1875–1884 | 28.61**          |
| 1885–1894 | 29.78**          |
| 1895–1904 | 39.54**          |
| 1905–1913 | 40.03**          |

\*Liczbińska, G.: Umieralność wśród katolickiej i ewangelickiej ludności historycznego Poznania. Poznań, ISBN 978-83-61845-01-1, 2009.

\*\*authors' calculations based on data derived from Prussian Statistical Yearbooks (Preussische Statistik. Die Bewegung der Bevölkerung. Die Geburten, Eheschliessungen und Sterbefälle. Herausgegeben in zwanglosen Heften vom Königl. Preussischen Statistischen Bureau in Berlin. XLII–XLII–MMXLV, 1875–1913).
