# Supplementary material for: Climate and disease in historical urban space: evidence from 19th century Poznań, Poland
Source: Copernicus journal article supplement (doi:10.5194/cp-20-137-2024), 2024-01-17
Supplement: Supplementary file 1 [file Database_PoznaΣ disaeses & Climate.xlsx]

## Sheet: Poznań - mortality, climate
No.	Year of death	Month of death	Season of death	Monthly rainfall (in month of death)	LAG 1 Monthly rainfall (in month of death)	Yearly rainfall (in year of death)	Average monthly temperature (in month of death)	LAG 1 Average monthly temperature (in month of death)	Average annual temperature (in year of death)	The highest temperature ( in month of death)	LAG The highest temperature ( in month of death)	The lowest temperature (in month of death)	LAG The lowest temperature (in month of death)	sex	QUARTER	causes of death CODE	1-waterborne diseases, 2-airborne diseases, 3-other causes of death
1	1882	2	1	5	18	486	1.9	1.2	8.9	15.2	8.3	-6.2	-5	1	3	1	3
2	1850	1	1	47	25	536	-9.7	-5.1	7.7	1.8	5.4	-36.5	-17.9	1	4	1	2
3	1850	1	1	47	25	536	-9.7	-5.1	7.7	1.8	5.4	-36.5	-17.9	0	3	2	2
4	1850	1	1	47	26	536	-9.7	-5.1	7.7	1.8	5.4	-36.5	-17.9	0	3	2	2
5	1850	1	1	47	27	536	-9.7	-5.1	7.7	1.8	5.4	-36.5	-17.9	0	3	2	2
6	1850	1	1	47	28	536	-9.7	-5.1	7.7	1.8	5.4	-36.5	-17.9	0	6	2	2
7	1850	1	1	47	29	536	-9.7	-5.1	7.7	1.8	5.4	-36.5	-17.9	0	4	2	2
8	1850	1	1	47	30	536	-9.7	-5.1	7.7	1.8	5.4	-36.5	-17.9	0	4	2	2
9	1850	1	1	47	31	536	-9.7	-5.1	7.7	1.8	5.4	-36.5	-17.9	0	1	4	3
10	1850	1	1	47	32	536	-9.7	-5.1	7.7	1.8	5.4	-36.5	-17.9	1	3	4	3
11	1850	1	1	47	33	536	-9.7	-5.1	7.7	1.8	5.4	-36.5	-17.9	0	3	5	3
12	1850	1	1	47	34	536	-9.7	-5.1	7.7	1.8	5.4	-36.5	-17.9	0	3	5	3
13	1850	1	1	47	35	536	-9.7	-5.1	7.7	1.8	5.4	-36.5	-17.9	0	3	5	3
14	1850	1	1	47	36	536	-9.7	-5.1	7.7	1.8	5.4	-36.5	-17.9	0	6	5	3
15	1850	1	1	47	37	536	-9.7	-5.1	7.7	1.8	5.4	-36.5	-17.9	1	3	5	3
16	1850	1	1	47	38	536	-9.7	-5.1	7.7	1.8	5.4	-36.5	-17.9	0	3	5	3
17	1850	1	1	47	39	536	-9.7	-5.1	7.7	1.8	5.4	-36.5	-17.9	0	4	5	3
18	1850	1	1	47	40	536	-9.7	-5.1	7.7	1.8	5.4	-36.5	-17.9	0	3	5	3
19	1850	1	1	47	41	536	-9.7	-5.1	7.7	1.8	5.4	-36.5	-17.9	1	6	5	3
20	1850	1	1	47	42	536	-9.7	-5.1	7.7	1.8	5.4	-36.5	-17.9	0	3	5	3
21	1850	1	1	47	43	536	-9.7	-5.1	7.7	1.8	5.4	-36.5	-17.9	1	3	6	3
22	1850	1	1	47	44	536	-9.7	-5.1	7.7	1.8	5,4	-36.5	-17.9	0	6	6	3
23	1850	2	1	50	45	536	2	-9.7	7.7	10	1.8	-12.9	-36.5	1	1	2	2
24	1850	2	1	50	46	536	2	-9.7	7.7	10	1.8	-12.9	-36.5	1	3	2	2
25	1850	2	1	50	47	536	2	-9.7	7.7	10	1.8	-12.9	-36.5	0	4	2	2
26	1850	2	1	50	48	536	2	-9.7	7.7	10	1.8	-12.9	-36.5	1	5	2	2
27	1850	2	1	50	49	536	2	-9.7	7.7	10	1.8	-12.9	-36.5	1	5	2	2
28	1850	2	1	50	50	536	2	-9.7	7.7	10	1.8	-12.9	-36.5	0	1	3	3
29	1850	2	1	50	51	536	2	-9.7	7.7	10	1.8	-12.9	-36.5	0	3	3	3
30	1850	2	1	50	52	536	2	-9.7	7.7	10	1.8	-12.9	-36.5	1	4	4	3
31	1850	2	1	50	53	536	2	-9.7	7.7	10	1.8	-12.9	-36.5	1	3	5	3
32	1850	2	1	50	54	536	2	-9.7	7.7	10	1.8	-12.9	-36.5	0	3	5	3
33	1850	2	1	50	55	536	2	-9.7	7.7	10	1.8	-12.9	-36.5	0	3	5	3
34	1850	2	1	50	56	536	2	-9.7	7.7	10	1.8	-12.9	-36.5	1	3	5	3
35	1850	2	1	50	57	536	2	-9.7	7.7	10	1.8	-12.9	-36.5	0	4	5	3
36	1850	2	1	50	58	536	2	-9.7	7.7	10	1.8	-12.9	-36.5	1	3	5	3
37	1850	2	1	50	59	536	2	-9.7	7.7	10	1.8	-12.9	-36.5	0	3	5	3
38	1850	2	1	50	60	536	2	-9.7	7.7	10	1.8	-12.9	-36.5	0	1	5	3
39	1850	2	1	50	61	536	2	-9.7	7.7	10	1.8	-12.9	-36.5	0	6	5	3
40	1850	2	1	50	62	536	2	-9.7	7.7	10	1.8	-12.9	-36.5	0	6	5	3
41	1850	2	1	50	63	536	2	-9.7	7.7	10	1.8	-12.9	-36.5	0	6	5	3
42	1850	2	1	50	64	536	2	-9.7	7.7	10	1.8	-12.9	-36.5	1	3	5	3
43	1850	2	1	50	65	536	2	-9.7	7.7	10	1.8	-12.9	-36.5	0	4	5	3
44	1850	2	1	50	66	536	2	-9.7	7.7	10	1.8	-12.9	-36.5	0	6	6	3
45	1850	3	2	29	67	536	-0.7	2	7.7	12.8	10	-11.5	-12.9	0	3	2	2
46	1850	3	2	29	68	536	-0.7	2	7.7	12.8	10	-11.5	-12.9	0	6	2	2
47	1850	3	2	29	69	536	-0.7	2	7.7	12.8	10	-11.5	-12.9	0	3	3	3
48	1850	3	2	29	70	536	-0.7	2	7.7	12.8	10	-11.5	-12.9	1	4	3	3
49	1850	3	2	29	71	536	-0.7	2	7.7	12.8	10	-11.5	-12.9	1	3	3	3
50	1850	3	2	29	72	536	-0.7	2	7.7	12.8	10	-11.5	-12.9	0	1	4	3
51	1850	3	2	29	73	536	-0.7	2	7.7	12.8	10	-11.5	-12.9	0	4	4	3
52	1850	3	2	29	74	536	-0.7	2	7.7	12.8	10	-11.5	-12.9	0	6	4	3
53	1850	3	2	29	75	536	-0.7	2	7.7	12.8	10	-11.5	-12.9	1	3	4	3
54	1850	3	2	29	76	536	-0.7	2	7.7	12.8	10	-11.5	-12.9	1	6	4	3
55	1850	3	2	29	77	536	-0.7	2	7.7	12.8	10	-11.5	-12.9	1	3	5	3
56	1850	3	2	29	78	536	-0.7	2	7.7	12.8	10	-11.5	-12.9	1	4	5	3
57	1850	3	2	29	79	536	-0.7	2	7.7	12.8	10	-11.5	-12.9	0	3	5	3
58	1850	3	2	29	80	536	-0.7	2	7.7	12.8	10	-11.5	-12.9	1	3	5	3
59	1850	3	2	29	81	536	-0.7	2	7.7	12.8	10	-11.5	-12.9	1	4	5	3
60	1850	3	2	29	82	536	-0.7	2	7.7	12.8	10	-11.5	-12.9	1	4	5	3
61	1850	3	2	29	83	536	-0.7	2	7.7	12.8	10	-11.5	-12.9	1	3	5	3
62	1850	3	2	29	84	536	-0.7	2	7.7	12.8	10	-11.5	-12.9	1	6	6	3
63	1850	3	2	29	85	536	-0.7	2	7.7	12.8	10	-11.5	-12.9	0	3	6	3
64	1850	4	2	22	86	536	7.6	-0.7	7.7	18.3	12.8	-10.5	-11.5	0	3	1	1
65	1850	4	2	22	87	536	7.6	-0.7	7.7	18.3	12.8	-10.5	-11.5	1	6	1	2
66	1850	4	2	22	88	536	7.6	-0.7	7.7	18.3	12.8	-10.5	-11.5	1	3	2	2
67	1850	4	2	22	89	536	7.6	-0.7	7.7	18.3	12.8	-10.5	-11.5	1	4	2	2
68	1850	4	2	22	90	536	7.6	-0.7	7.7	18.3	12.8	-10.5	-11.5	0	4	2	2
69	1850	4	2	22	91	536	7.6	-0.7	7.7	18.3	12.8	-10.5	-11.5	1	4	2	2
70	1850	4	2	22	92	536	7.6	-0.7	7.7	18.3	12.8	-10.5	-11.5	1	4	2	2
71	1850	4	2	22	93	536	7.6	-0.7	7.7	18.3	12.8	-10.5	-11.5	0	3	3	3
72	1850	4	2	22	94	536	7.6	-0.7	7.7	18.3	12.8	-10.5	-11.5	0	3	3	3
73	1850	4	2	22	95	536	7.6	-0.7	7.7	18.3	12.8	-10.5	-11.5	1	3	3	3
74	1850	4	2	22	96	536	7.6	-0.7	7.7	18.3	12.8	-10.5	-11.5	1	3	3	3
75	1850	4	2	22	97	536	7.6	-0.7	7.7	18.3	12.8	-10.5	-11.5	0	4	3	3
76	1850	4	2	22	98	536	7.6	-0.7	7.7	18.3	12.8	-10.5	-11.5	0	4	3	3
77	1850	4	2	22	99	536	7.6	-0.7	7.7	18.3	12.8	-10.5	-11.5	1	3	3	3
78	1850	4	2	22	100	536	7.6	-0.7	7.7	18.3	12.8	-10.5	-11.5	1	4	3	3
79	1850	4	2	22	101	536	7.6	-0.7	7.7	18.3	12.8	-10.5	-11.5	1	5	4	3
80	1850	4	2	22	102	536	7.6	-0.7	7.7	18.3	12.8	-10.5	-11.5	0	6	4	3
81	1850	4	2	22	103	536	7.6	-0.7	7.7	18.3	12.8	-10.5	-11.5	0	1	5	3
82	1850	4	2	22	104	536	7.6	-0.7	7.7	18.3	12.8	-10.5	-11.5	0	3	5	3
83	1850	4	2	22	105	536	7.6	-0.7	7.7	18.3	12.8	-10.5	-11.5	1	3	5	3
84	1850	4	2	22	106	536	7.6	-0.7	7.7	18.3	12.8	-10.5	-11.5	0	3	5	3
85	1850	4	2	22	107	536	7.6	-0.7	7.7	18.3	12.8	-10.5	-11.5	1	3	5	3
86	1850	4	2	22	108	536	7.6	-0.7	7.7	18.3	12.8	-10.5	-11.5	0	6	6	3
87	1850	4	2	22	109	536	7.6	-0.7	7.7	18.3	12.8	-10.5	-11.5	1	3	6	3
88	1850	4	2	22	110	536	7.6	-0.7	7.7	18.3	12.8	-10.5	-11.5	0	4	6	3
89	1850	4	2	22	111	536	7.6	-0.7	7.7	18.3	12.8	-10.5	-11.5	0	3	6	3
90	1850	4	2	22	112	536	7.6	-0.7	7.7	18.3	12.8	-10.5	-11.5	1	6	3	3
91	1850	5	2	47	113	536	14.1	7.6	7.7	27.3	18.3	-0.6	-10.5	1	4	2	2
92	1850	5	2	47	114	536	14.1	7.6	7.7	27.3	18.3	-0.6	-10.5	0	3	3	3
93	1850	5	2	47	115	536	14.1	7.6	7.7	27.3	18.3	-0.6	-10.5	1	4	3	3
94	1850	5	2	47	116	536	14.1	7.6	7.7	27.3	18.3	-0.6	-10.5	0	4	3	3
95	1850	5	2	47	117	536	14.1	7.6	7.7	27.3	18.3	-0.6	-10.5	0	5	3	3
96	1850	5	2	47	118	536	14.1	7.6	7.7	27.3	18.3	-0.6	-10.5	1	4	3	3
97	1850	5	2	47	119	536	14.1	7.6	7.7	27.3	18.3	-0.6	-10.5	1	6	4	3
98	1850	5	2	47	120	536	14.1	7.6	7.7	27.3	18.3	-0.6	-10.5	1	6	4	3
99	1850	5	2	47	121	536	14.1	7.6	7.7	27.3	18.3	-0.6	-10.5	1	3	5	3
100	1850	5	2	47	122	536	14.1	7.6	7.7	27.3	18.3	-0.6	-10.5	1	3	5	3
101	1850	5	2	47	123	536	14.1	7.6	7.7	27.3	18.3	-0.6	-10.5	0	4	5	3
102	1850	5	2	47	124	536	14.1	7.6	7.7	27.3	18.3	-0.6	-10.5	0	4	5	3
103	1850	5	2	47	125	536	14.1	7.6	7.7	27.3	18.3	-0.6	-10.5	1	4	5	3
104	1850	5	2	47	126	536	14.1	7.6	7.7	27.3	18.3	-0.6	-10.5	0	3	5	3
105	1850	5	2	47	127	536	14.1	7.6	7.7	27.3	18.3	-0.6	-10.5	0	3	5	3
106	1850	5	2	47	128	536	14.1	7.6	7.7	27.3	18.3	-0.6	-10.5	1	3	5	3
107	1850	5	2	47	129	536	14.1	7.6	7.7	27.3	18.3	-0.6	-10.5	1	3	5	3
108	1850	5	2	47	130	536	14.1	7.6	7.7	27.3	18.3	-0.6	-10.5	1	4	5	3
109	1850	5	2	47	131	536	14.1	7.6	7.7	27.3	18.3	-0.6	-10.5	1	6	6	3
110	1850	5	2	47	132	536	14.1	7.6	7.7	27.3	18.3	-0.6	-10.5	1	3	6	3
111	1850	6	3	61	133	536	18.2	14.1	7.7	28.3	27.3	9.4	-0.6	1	3	2	2
112	1850	6	3	61	134	536	18.2	14.1	7.7	28.3	27.3	9.4	-0.6	1	3	2	2
113	1850	6	3	61	135	536	18.2	14.1	7.7	28.3	27.3	9.4	-0.6	1	3	2	2
114	1850	6	3	61	136	536	18.2	14.1	7.7	28.3	27.3	9.4	-0.6	1	4	3	3
115	1850	6	3	61	137	536	18.2	14.1	7.7	28.3	27.3	9.4	-0.6	1	3	4	3
116	1850	6	3	61	138	536	18.2	14.1	7.7	28.3	27.3	9.4	-0.6	1	3	4	3
117	1850	6	3	61	139	536	18.2	14.1	7.7	28.3	27.3	9.4	-0.6	0	6	4	3
118	1850	6	3	61	140	536	18.2	14.1	7.7	28.3	27.3	9.4	-0.6	1	6	5	3
119	1850	6	3	61	141	536	18.2	14.1	7.7	28.3	27.3	9.4	-0.6	0	6	5	3
120	1850	6	3	61	142	536	18.2	14.1	7.7	28.3	27.3	9.4	-0.6	0	3	5	3
121	1850	6	3	61	143	536	18.2	14.1	7.7	28.3	27.3	9.4	-0.6	0	4	5	3
122	1850	6	3	61	144	536	18.2	14.1	7.7	28.3	27.3	9.4	-0.6	0	6	5	3
123	1850	6	3	61	145	536	18.2	14.1	7.7	28.3	27.3	9.4	-0.6	1	4	5	3
124	1850	6	3	61	146	536	18.2	14.1	7.7	28.3	27.3	9.4	-0.6	1	6	5	3
125	1850	6	3	61	147	536	18.2	14.1	7.7	28.3	27.3	9.4	-0.6	1	6	5	3
126	1850	6	3	61	148	536	18.2	14.1	7.7	28.3	27.3	9.4	-0.6	1	6	5	3
127	1850	6	3	61	149	536	18.2	14.1	7.7	28.3	27.3	9.4	-0.6	0	4	5	3
128	1850	6	3	61	150	536	18.2	14.1	7.7	28.3	27.3	9.4	-0.6	0	4	5	3
129	1850	6	3	61	151	536	18.2	14.1	7.7	28.3	27.3	9.4	-0.6	1	4	5	3
130	1850	6	3	61	152	536	18.2	14.1	7.7	28.3	27.3	9.4	-0.6	0	3	6	3
131	1850	6	3	61	153	536	18.2	14.1	7.7	28.3	27.3	9.4	-0.6	0	3	6	3
132	1850	6	3	61	154	536	18.2	14.1	7.7	28.3	27.3	9.4	-0.6	0	3	6	3
133	1850	7	3	43	155	536	18.2	18.2	7.7	27.9	28.3	10.3	9.4	1	1	1	2
134	1850	7	3	43	156	536	18.2	18.2	7.7	27.9	28.3	10.3	9.4	1	3	1	2
135	1850	7	3	43	157	536	18.2	18.2	7.7	27.9	28.3	10.3	9.4	1	3	1	2
136	1850	7	3	43	158	536	18.2	18.2	7.7	27.9	28.3	10.3	9.4	0	6	2	2
137	1850	7	3	43	159	536	18.2	18.2	7.7	27.9	28.3	10.3	9.4	1	3	3	3
138	1850	7	3	43	160	536	18.2	18.2	7.7	27.9	28.3	10.3	9.4	1	6	3	3
139	1850	7	3	43	161	536	18.2	18.2	7.7	27.9	28.3	10.3	9.4	0	4	3	3
140	1850	7	3	43	162	536	18.2	18.2	7.7	27.9	28.3	10.3	9.4	0	3	3	3
141	1850	7	3	43	163	536	18.2	18.2	7.7	27.9	28.3	10.3	9.4	0	6	3	3
142	1850	7	3	43	164	536	18.2	18.2	7.7	27.9	28.3	10.3	9.4	1	3	4	3
143	1850	7	3	43	165	536	18.2	18.2	7.7	27.9	28.3	10.3	9.4	0	3	4	3
144	1850	7	3	43	166	536	18.2	18.2	7.7	27.9	28.3	10.3	9.4	0	6	4	3
145	1850	7	3	43	167	536	18.2	18.2	7.7	27.9	28.3	10.3	9.4	1	4	5	3
146	1850	7	3	43	168	536	18.2	18.2	7.7	27.9	28.3	10.3	9.4	1	4	5	3
147	1850	7	3	43	169	536	18.2	18.2	7.7	27.9	28.3	10.3	9.4	0	4	5	3
148	1850	7	3	43	170	536	18.2	18.2	7.7	27.9	28.3	10.3	9.4	1	4	5	3
149	1850	7	3	43	171	536	18.2	18.2	7.7	27.9	28.3	10.3	9.4	1	6	5	3
150	1850	7	3	43	172	536	18.2	18.2	7.7	27.9	28.3	10.3	9.4	1	3	5	3
151	1850	7	3	43	173	536	18.2	18.2	7.7	27.9	28.3	10.3	9.4	0	3	5	3
152	1850	7	3	43	174	536	18.2	18.2	7.7	27.9	28.3	10.3	9.4	0	4	5	3
153	1850	7	3	43	175	536	18.2	18.2	7.7	27.9	28.3	10.3	9.4	0	4	5	3
154	1850	7	3	43	176	536	18.2	18.2	7.7	27.9	28.3	10.3	9.4	1	3	6	3
155	1850	7	3	43	177	536	18.2	18.2	7.7	27.9	28.3	10.3	9.4	0	3	6	3
156	1850	7	3	43	178	536	18.2	18.2	7.7	27.9	28.3	10.3	9.4	0	4	6	3
157	1850	8	3	31	179	536	18.1	18.2	7.7	32	27.9	8.1	10.3	0	3	1	1
158	1850	8	3	31	180	536	18.1	18.2	7.7	32	27.9	8.1	10.3	0	3	1	1
159	1850	8	3	31	181	536	18.1	18.2	7.7	32	27.9	8.1	10.3	1	3	1	1
160	1850	8	3	31	182	536	18.1	18.2	7.7	32	27.9	8.1	10.3	1	3	1	1
161	1850	8	3	31	183	536	18.1	18.2	7.7	32	27.9	8.1	10.3	0	1	1	1
162	1850	8	3	31	184	536	18.1	18.2	7.7	32	27.9	8.1	10.3	1	4	1	1
163	1850	8	3	31	185	536	18.1	18.2	7.7	32	27.9	8.1	10.3	1	3	2	2
164	1850	8	3	31	186	536	18.1	18.2	7.7	32	27.9	8.1	10.3	1	6	2	2
165	1850	8	3	31	187	536	18.1	18.2	7.7	32	27.9	8.1	10.3	1	6	2	2
166	1850	8	3	31	188	536	18.1	18.2	7.7	32	27.9	8.1	10.3	1	4	2	2
167	1850	8	3	31	189	536	18.1	18.2	7.7	32	27.9	8.1	10.3	0	6	3	3
168	1850	8	3	31	190	536	18.1	18.2	7.7	32	27.9	8.1	10.3	1	5	3	3
169	1850	8	3	31	191	536	18.1	18.2	7.7	32	27.9	8.1	10.3	0	3	3	3
170	1850	8	3	31	192	536	18.1	18.2	7.7	32	27.9	8.1	10.3	1	4	3	3
171	1850	8	3	31	193	536	18.1	18.2	7.7	32	27.9	8.1	10.3	1	6	3	3
172	1850	8	3	31	194	536	18.1	18.2	7.7	32	27.9	8.1	10.3	0	3	5	3
173	1850	8	3	31	195	536	18.1	18.2	7.7	32	27.9	8.1	10.3	0	3	5	3
174	1850	8	3	31	196	536	18.1	18.2	7.7	32	27.9	8.1	10.3	0	3	5	3
175	1850	8	3	31	197	536	18.1	18.2	7.7	32	27.9	8.1	10.3	1	3	5	3
176	1850	8	3	31	198	536	18.1	18.2	7.7	32	27.9	8.1	10.3	1	4	5	3
177	1850	8	3	31	199	536	18.1	18.2	7.7	32	27.9	8.1	10.3	1	4	5	3
178	1850	8	3	31	200	536	18.1	18.2	7.7	32	27.9	8.1	10.3	0	6	5	3
179	1850	8	3	31	201	536	18.1	18.2	7.7	32	27.9	8.1	10.3	1	3	5	3
180	1850	8	3	31	202	536	18.1	18.2	7.7	32	27.9	8.1	10.3	1	4	5	3
181	1850	8	3	31	203	536	18.1	18.2	7.7	32	27.9	8.1	10.3	0	3	5	3
182	1850	8	3	31	204	536	18.1	18.2	7.7	32	27.9	8.1	10.3	1	6	5	3
183	1850	8	3	31	205	536	18.1	18.2	7.7	32	27.9	8.1	10.3	1	4	5	3
184	1850	8	3	31	206	536	18.1	18.2	7.7	32	27.9	8.1	10.3	1	3	5	3
185	1850	8	3	31	207	536	18.1	18.2	7.7	32	27.9	8.1	10.3	0	3	5	3
186	1850	8	3	31	208	536	18.1	18.2	7.7	32	27.9	8.1	10.3	1	4	5	3
187	1850	8	3	31	209	536	18.1	18.2	7.7	32	27.9	8.1	10.3	0	4	6	3
188	1850	8	3	31	210	536	18.1	18.2	7.7	32	27.9	8.1	10.3	1	3	3	3
189	1850	8	3	31	211	536	18.1	18.2	7.7	32	27.9	8.1	10.3	1	3	6	3
190	1850	8	3	31	212	536	18.1	18.2	7.7	32	27.9	8.1	10.3	0	3	6	3
191	1850	8	3	31	213	536	18.1	18.2	7.7	32	27.9	8.1	10.3	0	3	6	3
192	1850	8	3	31	214	536	18.1	18.2	7.7	32	27.9	8.1	10.3	0	3	6	3
193	1850	9	4	29	215	536	11.9	18.1	7.7	20.8	32	4.5	8.1	0	3	1	1
194	1850	9	4	29	216	536	11.9	18.1	7.7	20.8	32	4.5	8.1	1	3	1	1
195	1850	9	4	29	217	536	11.9	18.1	7.7	20.8	32	4.5	8.1	0	3	1	1
196	1850	9	4	29	218	536	11.9	18.1	7.7	20.8	32	4.5	8.1	0	3	1	1
197	1850	9	4	29	219	536	11.9	18.1	7.7	20.8	32	4.5	8.1	1	3	2	2
198	1850	9	4	29	220	536	11.9	18.1	7.7	20.8	32	4.5	8.1	0	3	2	2
199	1850	9	4	29	221	536	11.9	18.1	7.7	20.8	32	4.5	8.1	0	6	2	2
200	1850	9	4	29	222	536	11.9	18.1	7.7	20.8	32	4.5	8.1	1	6	2	2
201	1850	9	4	29	223	536	11.9	18.1	7.7	20.8	32	4.5	8.1	1	4	2	2
202	1850	9	4	29	224	536	11.9	18.1	7.7	20.8	32	4.5	8.1	0	4	3	3
203	1850	9	4	29	225	536	11.9	18.1	7.7	20.8	32	4.5	8.1	1	6	3	3
204	1850	9	4	29	226	536	11.9	18.1	7.7	20.8	32	4.5	8.1	0	3	3	3
205	1850	9	4	29	227	536	11.9	18.1	7.7	20.8	32	4.5	8.1	0	5	4	3
206	1850	9	4	29	228	536	11.9	18.1	7.7	20.8	32	4.5	8.1	1	3	4	3
207	1850	9	4	29	229	536	11.9	18.1	7.7	20.8	32	4.5	8.1	1	5	5	3
208	1850	9	4	29	230	536	11.9	18.1	7.7	20.8	32	4.5	8.1	0	4	5	3
209	1850	9	4	29	231	536	11.9	18.1	7.7	20.8	32	4.5	8.1	0	1	5	3
210	1850	9	4	29	232	536	11.9	18.1	7.7	20.8	32	4.5	8.1	0	3	5	3
211	1850	9	4	29	233	536	11.9	18.1	7.7	20.8	32	4.5	8.1	0	4	5	3
212	1850	9	4	29	234	536	11.9	18.1	7.7	20.8	32	4.5	8.1	1	4	5	3
213	1850	9	4	29	235	536	11.9	18.1	7.7	20.8	32	4.5	8.1	1	3	6	3
214	1850	9	4	29	236	536	11.9	18.1	7.7	20.8	32	4.5	8.1	0	3	6	3
215	1850	9	4	29	237	536	11.9	18.1	7.7	20.8	32	4.5	8.1	0	6	6	3
216	1850	10	4	79	238	536	7.6	11.9	7.7	17	20.8	-0.2	4.5	1	1	1	1
217	1850	10	4	79	239	536	7.6	11.9	7.7	17	20.8	-0.2	4.5	1	1	2	2
218	1850	10	4	79	240	536	7.6	11.9	7.7	17	20.8	-0.2	4.5	0	3	2	2
219	1850	10	4	79	241	536	7.6	11.9	7.7	17	20.8	-0.2	4.5	0	3	2	2
220	1850	10	4	79	242	536	7.6	11.9	7.7	17	20.8	-0.2	4.5	0	3	2	2
221	1850	10	4	79	243	536	7.6	11.9	7.7	17	20.8	-0.2	4.5	0	4	2	2
222	1850	10	4	79	244	536	7.6	11.9	7.7	17	20.8	-0.2	4.5	1	4	2	2
223	1850	10	4	79	245	536	7.6	11.9	7.7	17	20.8	-0.2	4.5	1	4	2	2
224	1850	10	4	79	246	536	7.6	11.9	7.7	17	20.8	-0.2	4.5	0	4	3	3
225	1850	10	4	79	247	536	7.6	11.9	7.7	17	20.8	-0.2	4.5	0	5	3	3
226	1850	10	4	79	248	536	7.6	11.9	7.7	17	20.8	-0.2	4.5	0	3	4	3
227	1850	10	4	79	249	536	7.6	11.9	7.7	17	20.8	-0.2	4.5	1	3	4	3
228	1850	10	4	79	250	536	7.6	11.9	7.7	17	20.8	-0.2	4.5	1	4	4	3
229	1850	10	4	79	251	536	7.6	11.9	7.7	17	20.8	-0.2	4.5	0	3	4	3
230	1850	10	4	79	252	536	7.6	11.9	7.7	17	20.8	-0.2	4.5	0	3	5	3
231	1850	10	4	79	253	536	7.6	11.9	7.7	17	20.8	-0.2	4.5	0	6	5	3
232	1850	10	4	79	254	536	7.6	11.9	7.7	17	20.8	-0.2	4.5	0	4	5	3
233	1850	10	4	79	255	536	7.6	11.9	7.7	17	20.8	-0.2	4.5	1	3	6	3
234	1850	11	4	55	256	536	3.8	7.6	7.7	12.5	17	-3.5	-0.2	0	3	2	2
235	1850	11	4	55	257	536	3.8	7.6	7.7	12.5	17	-3.5	-0.2	0	3	2	2
236	1850	11	4	55	258	536	3.8	7.6	7.7	12.5	17	-3.5	-0.2	1	3	2	2
237	1850	11	4	55	259	536	3.8	7.6	7.7	12.5	17	-3.5	-0.2	0	3	2	2
238	1850	11	4	55	260	536	3.8	7.6	7.7	12.5	17	-3.5	-0.2	1	6	2	2
239	1850	11	4	55	261	536	3.8	7.6	7.7	12.5	17	-3.5	-0.2	1	4	2	2
240	1850	11	4	55	262	536	3.8	7.6	7.7	12.5	17	-3.5	-0.2	1	3	3	3
241	1850	11	4	55	263	536	3.8	7.6	7.7	12.5	17	-3.5	-0.2	0	3	3	3
242	1850	11	4	55	264	536	3.8	7.6	7.7	12.5	17	-3.5	-0.2	1	6	3	3
243	1850	11	4	55	265	536	3.8	7.6	7.7	12.5	17	-3.5	-0.2	0	6	3	3
244	1850	11	4	55	266	536	3.8	7.6	7.7	12.5	17	-3.5	-0.2	1	6	3	3
245	1850	11	4	55	267	536	3.8	7.6	7.7	12.5	17	-3.5	-0.2	0	3	4	3
246	1850	11	4	55	268	536	3.8	7.6	7.7	12.5	17	-3.5	-0.2	0	3	4	3
247	1850	11	4	55	269	536	3.8	7.6	7.7	12.5	17	-3.5	-0.2	1	5	4	3
248	1850	11	4	55	270	536	3.8	7.6	7.7	12.5	17	-3.5	-0.2	1	4	4	3
249	1850	11	4	55	271	536	3.8	7.6	7.7	12.5	17	-3.5	-0.2	0	6	5	3
250	1850	11	4	55	272	536	3.8	7.6	7.7	12.5	17	-3.5	-0.2	1	3	5	3
251	1850	11	4	55	273	536	3.8	7.6	7.7	12.5	17	-3.5	-0.2	1	3	5	3
252	1850	11	4	55	274	536	3.8	7.6	7.7	12.5	17	-3.5	-0.2	1	3	6	3
253	1850	11	4	55	275	536	3.8	7.6	7.7	12.5	17	-3.5	-0.2	1	6	6	3
254	1850	12	1	43	276	536	0.8	3.8	7.7	9	12.5	-5.3	-3.5	0	6	1	1
255	1850	12	1	43	277	536	0.8	3.8	7.7	9	12.5	-5.3	-3.5	0	3	2	2
256	1850	12	1	43	278	536	0.8	3.8	7.7	9	12.5	-5.3	-3.5	0	6	2	2
257	1850	12	1	43	279	536	0.8	3.8	7.7	9	12.5	-5.3	-3.5	1	6	2	2
258	1850	12	1	43	280	536	0.8	3.8	7.7	9	12.5	-5.3	-3.5	0	6	2	2
259	1850	12	1	43	281	536	0.8	3.8	7.7	9	12.5	-5.3	-3.5	1	3	2	2
260	1850	12	1	43	282	536	0.8	3.8	7.7	9	12.5	-5.3	-3.5	1	4	2	2
261	1850	12	1	43	283	536	0.8	3.8	7.7	9	12.5	-5.3	-3.5	1	4	3	3
262	1850	12	1	43	284	536	0.8	3.8	7.7	9	12.5	-5.3	-3.5	0	6	3	3
263	1850	12	1	43	285	536	0.8	3.8	7.7	9	12.5	-5.3	-3.5	1	3	3	3
264	1850	12	1	43	286	536	0.8	3.8	7.7	9	12.5	-5.3	-3.5	1	3	4	3
265	1850	12	1	43	287	536	0.8	3.8	7.7	9	12.5	-5.3	-3.5	1	3	4	3
266	1850	12	1	43	288	536	0.8	3.8	7.7	9	12.5	-5.3	-3.5	1	5	4	3
267	1850	12	1	43	289	536	0.8	3.8	7.7	9	12.5	-5.3	-3.5	1	3	5	3
268	1850	12	1	43	290	536	0.8	3.8	7.7	9	12.5	-5.3	-3.5	1	6	5	3
269	1850	12	1	43	291	536	0.8	3.8	7.7	9	12.5	-5.3	-3.5	1	3	5	3
270	1850	12	1	43	292	536	0.8	3.8	7.7	9	12.5	-5.3	-3.5	1	3	5	3
271	1850	12	1	43	293	536	0.8	3.8	7.7	9	12.5	-5.3	-3.5	1	3	5	3
272	1850	12	1	43	294	536	0.8	3.8	7.7	9	12.5	-5.3	-3.5	1	3	5	3
273	1850	12	1	43	295	536	0.8	3.8	7.7	9	12.5	-5.3	-3.5	0	3	5	3
274	1850	12	1	43	296	536	0.8	3.8	7.7	9	12.5	-5.3	-3.5	0	4	5	3
275	1850	12	1	43	297	536	0.8	3.8	7.7	9	12.5	-5.3	-3.5	0	6	5	3
276	1850	12	1	43	298	536	0.8	3.8	7.7	9	12.5	-5.3	-3.5	0	4	5	3
277	1850	12	1	43	299	536	0.8	3.8	7.7	9	12.5	-5.3	-3.5	1	4	5	3
278	1850	12	1	43	300	536	0.8	3.8	7.7	9	12.5	-5.3	-3.5	1	4	5	3
279	1850	12	1	43	301	536	0.8	3.8	7.7	9	12.5	-5.3	-3.5	0	3	5	3
280	1850	12	1	43	302	536	0.8	3.8	7.7	9	12.5	-5.3	-3.5	1	3	5	3
281	1850	12	1	43	303	536	0.8	3.8	7.7	9	12.5	-5.3	-3.5	1	3	5	3
282	1850	12	1	43	304	536	0.8	3.8	7.7	9	12.5	-5.3	-3.5	1	6	5	3
283	1850	12	1	43	305	536	0.8	3.8	7.7	9	12.5	-5.3	-3.5	1	6	5	3
284	1850	12	1	43	306	536	0.8	3.8	7.7	9	12.5	-5.3	-3.5	1	4	5	3
285	1850	12	1	43	307	536	0.8	3.8	7.7	9	12.5	-5.3	-3.5	0	4	5	3
286	1850	12	1	43	308	536	0.8	3.8	7.7	9	12.5	-5.3	-3.5	0	4	5	3
287	1850	12	1	43	309	536	0.8	3.8	7.7	9	12.5	-5.3	-3.5	0	1	6	3
288	1850	12	1	43	310	536	0.8	3.8	7.7	9	12.5	-5.3	-3.5	1	3	6	3
289	1851	1	1	29	311	475	-1,4	0,8	8,1	8	9	-12,0	-5,3	1	4	1	1
290	1851	1	1	29	312	475	-1,4	0,8	8,1	8	9	-12,0	-5,3	0	5	1	1
291	1851	1	1	29	313	475	-1,4	0,8	8,1	8	9	-12,0	-5,3	0	4	3	3
292	1851	1	1	29	314	475	-1,4	0,8	8,1	8	9	-12,0	-5,3	0	4	4	3
293	1851	1	1	29	315	475	-1,4	0,8	8,1	8	9	-12,0	-5,3	0	5	5	3
294	1851	1	1	29	316	475	-1,4	0,8	8,1	8	9	-12,0	-5,3	0	4	5	3
295	1851	1	1	29	317	475	-1,4	0,8	8,1	8	9	-12,0	-5,3	0	5	6	3
296	1851	2	1	10	318	475	-0,7	-1,4	8,1	5,8	8	-11,0	-12.0	0	4	3	3
297	1851	2	1	10	319	475	-0,7	-1,4	8,1	5,8	8	-11,0	-12.0	1	5	5	3
298	1851	2	1	10	320	475	-0,7	-1,4	8,1	5,8	8	-11,0	-12.0	0	4	5	3
299	1851	2	1	10	321	475	-0,7	-1,4	8,1	5,8	8	-11,0	-12.0	0	4	5	3
300	1851	2	1	10	322	475	-0,7	-1,4	8,1	5,8	8	-11,0	-12.0	0	4	5	3
301	1851	2	1	10	323	475	-0,7	-1,4	8,1	5,8	8	-11,0	-12.0	0	4	5	3
302	1851	2	1	10	324	475	-0,7	-1,4	8,1	5,8	8	-11,0	-12.0	1	5	6	3
303	1851	2	1	10	325	475	-0,7	-1,4	8,1	5,8	8	-11,0	-12.0	0	4	6	3
304	1851	2	1	10	326	475	-0,7	-1,4	8,1	5,8	8	-11,0	-12.0	1	4	6	3
305	1851	2	1	10	327	475	-0,7	-1,4	8,1	5,8	8	-11,0	-12.0	1	4	6	3
306	1851	3	2	36	328	475	2.1	-0,1	8.1	15.5	5,8	-15.3	-11,0	1	4	1	2
307	1851	3	2	36	329	475	2.1	-0,1	8.1	15.5	5,8	-15.3	-11,0	0	4	3	3
308	1851	3	2	36	330	475	2.1	-0,1	8.1	15.5	5,8	-15.3	-11,0	1	4	3	3
309	1851	3	2	36	331	475	2.1	-0,1	8.1	15.5	5,8	-15.3	-11,0	1	5	4	3
310	1851	3	2	36	332	475	2.1	-0,1	8.1	15.5	5,8	-15.3	-11,0	1	5	5	3
311	1851	3	2	36	333	475	2.1	-0,1	8.1	15.5	5,8	-15.3	-11,0	0	5	5	3
312	1851	3	2	36	334	475	2.1	-0,1	8.1	15.5	5,8	-15.3	-11,0	0	4	5	3
313	1851	3	2	36	335	475	2.1	-0,1	8.1	15.5	5,8	-15.3	-11,0	0	4	5	3
314	1851	3	2	36	336	475	2.1	-0,1	8.1	15.5	5,8	-15.3	-11,0	1	4	5	3
315	1851	4	2	37	337	475	10.2	2.1	8.1	24.4	15.5	1.8	-15.3	1	4	2	2
316	1851	4	2	37	338	475	10.2	2.1	8.1	24.4	15.5	1.8	-15.3	0	5	4	3
317	1851	4	2	37	339	475	10.2	2.1	8.1	24.4	15.5	1.8	-15.3	1	4	5	3
318	1851	4	2	37	340	475	10.2	2.1	8.1	24.4	15.5	1.8	-15.3	1	4	5	3
319	1851	5	2	51	341	475	9.9	10.2	8.1	18.8	24.4	4.6	1.8	1	4	2	2
320	1851	5	2	51	342	475	9.9	10.2	8.1	18.8	24.4	4.6	1.8	0	4	3	3
321	1851	5	2	51	343	475	9.9	10.2	8.1	18.8	24.4	4.6	1.8	0	4	3	3
322	1851	5	2	51	344	475	9.9	10.2	8.1	18.8	24.4	4.6	1.8	1	5	4	3
323	1851	6	3	44	345	475	15.3	9.9	8.1	26.8	18.8	8.5	4.6	1	5	2	2
324	1851	6	3	44	346	475	15.3	9.9	8.1	26.8	18.8	8.5	4.6	0	4	2	2
325	1851	6	3	44	347	475	15.3	9.9	8.1	26.8	18.8	8.5	4.6	1	4	3	3
326	1851	6	3	44	348	475	15.3	9.9	8.1	26.8	18.8	8.5	4.6	0	4	3	3
327	1851	6	3	44	349	475	15.3	9.9	8.1	26.8	18.8	8.5	4.6	0	5	5	3
328	1851	6	3	44	350	475	15.3	9.9	8.1	26.8	18.8	8.5	4.6	0	4	5	3
329	1851	7	3	31	351	475	17,4	15.3	8.1	26,0	26,8	10,8	8,5	1	4	1	2
330	1851	7	3	31	352	475	17,4	15.3	8.1	26,0	26,8	10,8	8,5	0	4	2	2
331	1851	7	3	31	353	475	17,4	15.3	8.1	26,0	26,8	10,8	8,5	1	4	2	2
332	1851	7	3	31	354	475	17,4	15.3	8.1	26,0	26,8	10,8	8,5	0	4	3	3
333	1851	7	3	31	355	475	17,4	15.3	8.1	26,0	26,8	10,8	8,5	1	4	3	3
334	1851	7	3	31	356	475	17,4	15.3	8.1	26,0	26,8	10,8	8,5	0	4	5	3
335	1851	7	3	31	357	475	17,4	15.3	8.1	26,0	26,8	10,8	8,5	1	4	5	3
336	1851	7	3	31	358	475	17,4	15.3	8.1	26,0	26,8	10,8	8,5	1	4	5	3
337	1851	7	3	31	359	475	17,4	15.3	8.1	26,0	26,8	10,8	8,5	0	4	6	3
338	1851	8	3	39	360	475	17.6	17,4	8.1	31.1	26,0	7.9	10,8	0	4	1	2
339	1851	8	3	39	361	475	17.6	17,4	8.1	31.1	26,0	7.9	10,8	0	5	5	3
340	1851	8	3	39	362	475	17.6	17,4	8.1	31.1	26,0	7.9	10,8	0	4	5	3
341	1851	8	3	39	363	475	17.6	17,4	8.1	31.1	26,0	7.9	10,8	0	4	5	3
342	1851	8	3	39	364	475	17.6	17,4	8.1	31.1	26,0	7.9	10,8	0	4	5	3
343	1851	8	3	39	365	475	17.6	17,4	8.1	31.1	26,0	7.9	10,8	0	4	6	3
344	1851	9	4	43	366	475	12,8	17.6	8.1	21,5	31.1	4,3	7,9	0	4	1	2
345	1851	9	4	43	367	475	12,8	17.6	8.1	21,5	31.1	4,3	7,9	0	4	1	2
346	1851	9	4	43	368	475	12,8	17.6	8.1	21,5	31.1	4,3	7,9	1	4	1	2
347	1851	9	4	43	369	475	12,8	17.6	8.1	21,5	31.1	4,3	7,9	0	4	3	3
348	1851	9	4	43	370	475	12,8	17.6	8.1	21,5	31.1	4,3	7,9	1	4	3	3
349	1851	9	4	43	371	475	12,8	17.6	8.1	21,5	31.1	4,3	7,9	0	4	3	3
350	1851	9	4	43	372	475	12,8	17.6	8.1	21,5	31.1	4,3	7,9	1	4	5	3
351	1851	9	4	43	373	475	12,8	17.6	8.1	21,5	31.1	4,3	7,9	1	4	5	3
352	1851	9	4	43	374	475	12,8	17.6	8.1	21,5	31.1	4,3	7,9	0	4	6	3
353	1851	10	4	24	375	475	11,2	12,8	8.1	21,1	21,5	1	4,3	0	4	1	2
354	1851	10	4	24	376	475	11,2	12,8	8.1	21,1	21,5	1	4,3	0	4	1	2
355	1851	10	4	24	377	475	11,2	12,8	8.1	21,1	21,5	1	4,3	0	4	1	2
356	1851	10	4	24	378	475	11,2	12,8	8.1	21,1	21,5	1	4,3	1	4	1	2
357	1851	10	4	24	379	475	11,2	12,8	8.1	21,1	21,5	1	4,3	1	4	1	2
358	1851	10	4	24	380	475	11,2	12,8	8.1	21,1	21,5	1	4,3	1	4	1	2
359	1851	10	4	24	381	475	11,2	12,8	8.1	21,1	21,5	1	4,3	1	4	1	2
360	1851	10	4	24	382	475	11,2	12,8	8.1	21,1	21,5	1	4,3	1	4	1	2
361	1851	10	4	24	383	475	11,2	12,8	8.1	21,1	21,5	1	4,3	0	4	2	2
362	1851	10	4	24	384	475	11,2	12,8	8.1	21,1	21,5	1	4,3	0	6	2	2
363	1851	10	4	24	385	475	11,2	12,8	8.1	21,1	21,5	1	4,3	1	4	3	3
364	1851	10	4	24	386	475	11,2	12,8	8.1	21,1	21,5	1	4,3	0	4	5	3
365	1851	10	4	24	387	475	11,2	12,8	8.1	21,1	21,5	1	4,3	1	4	5	3
366	1851	10	4	24	388	475	11,2	12,8	8.1	21,1	21,5	1	4,3	0	4	5	3
367	1851	10	4	24	389	475	11,2	12,8	8.1	21,1	21,5	1	4,3	1	4	5	3
368	1851	10	4	24	390	475	11.2	12.8	8.1	21.1	21.5	1	4.3	0	4	6	3
369	1851	11	4	112	391	475	1.8	11,2	8.1	9.8	21,1	-5.4	1	0	4	1	2
370	1851	11	4	112	392	475	1.8	11,2	8.1	9.8	21,1	-5.4	1	0	4	1	2
371	1851	11	4	112	393	475	1.8	11,2	8.1	9.8	21,1	-5.4	1	1	4	1	2
372	1851	11	4	112	394	475	1.8	11,2	8.1	9.8	21,1	-5.4	1	1	4	1	2
373	1851	11	4	112	395	475	1.8	11,2	8.1	9.8	21,1	-5.4	1	1	4	1	2
374	1851	11	4	112	396	475	1.8	11,2	8.1	9.8	21,1	-5.4	1	1	4	2	2
375	1851	11	4	112	397	475	1.8	11,2	8.1	9.8	21,1	-5.4	1	1	4	5	3
376	1851	12	1	19	398	475	0,6	1.8	8.1	8,9	9.8	-11,0	-5.4	0	4	1	2
377	1851	12	1	19	399	475	0,6	1.8	8.1	8,9	9.8	-11,0	-5.4	0	4	1	2
378	1851	12	1	19	400	475	0,6	1.8	8.1	8,9	9.8	-11,0	-5.4	0	4	3	3
379	1851	12	1	19	401	475	0,6	1.8	8.1	8,9	9.8	-11,0	-5.4	0	4	3	3
380	1851	12	1	19	402	475	0.6	1.8	8.1	8.9	9.8	-11	-5.4	0	4	6	3
381	1851	12	1	19	403	475	0.6	1.8	8.1	8.9	9.8	-11	-5.4	0	4	6	3
382	1851	12	1	19	404	475	0,6	1.8	8.1	8,9	9.8	-11,0	-5.4	1	4	6	3
383	1852	1	1	33	405	534	2	0,6	8.7	7.3	8,9	-4.3	-11,0	1	6	1	1
384	1852	1	1	33	406	534	2	0,6	8.7	7.3	8,9	-4.3	-11,0	0	3	1	2
385	1852	1	1	33	407	534	2	0,6	8.7	7.3	8,9	-4.3	-11,0	0	1	2	2
386	1852	1	1	33	408	534	2	0,6	8.7	7.3	8,9	-4.3	-11,0	0	3	2	2
387	1852	1	1	33	409	534	2	0,6	8.7	7.3	8,9	-4.3	-11,0	0	3	2	2
388	1852	1	1	33	410	534	2	0,6	8.7	7.3	8,9	-4.3	-11,0	0	6	2	2
389	1852	1	1	33	411	534	2	0,6	8.7	7.3	8,9	-4.3	-11,0	0	4	2	2
390	1852	1	1	33	412	534	2	0,6	8.7	7.3	8,9	-4.3	-11,0	1	4	2	2
391	1852	1	1	33	413	534	2	0,6	8.7	7.3	8,9	-4.3	-11,0	1	1	3	3
392	1852	1	1	33	414	534	2	0,6	8.7	7.3	8,9	-4.3	-11,0	1	3	3	3
393	1852	1	1	33	415	534	2	0,6	8.7	7.3	8,9	-4.3	-11,0	0	4	3	3
394	1852	1	1	33	416	534	2	0,6	8.7	7.3	8,9	-4.3	-11,0	0	3	3	3
395	1852	1	1	33	417	534	2	0,6	8.7	7.3	8,9	-4.3	-11,0	1	3	3	3
396	1852	1	1	33	418	534	2	0,6	8.7	7.3	8,9	-4.3	-11,0	0	4	4	3
397	1852	1	1	33	419	534	2	0,6	8.7	7.3	8,9	-4.3	-11,0	0	5	4	3
398	1852	1	1	33	420	534	2	0,6	8.7	7.3	8,9	-4.3	-11,0	0	6	4	3
399	1852	1	1	33	421	534	2	0,6	8.7	7.3	8,9	-4.3	-11,0	1	3	4	3
400	1852	1	1	33	422	534	2	0,6	8.7	7.3	8,9	-4.3	-11,0	0	3	4	3
401	1852	1	1	33	423	534	2	0,6	8.7	7.3	8,9	-4.3	-11,0	0	3	4	3
402	1852	1	1	33	424	534	2	0,6	8.7	7.3	8,9	-4.3	-11,0	0	6	4	3
403	1852	1	1	33	425	534	2	0,6	8.7	7.3	8,9	-4.3	-11,0	0	5	5	3
404	1852	1	1	33	426	534	2	0,6	8.7	7.3	8,9	-4.3	-11,0	1	4	5	3
405	1852	1	1	33	427	534	2	0,6	8.7	7.3	8,9	-4.3	-11,0	1	3	5	3
406	1852	1	1	33	428	534	2	0,6	8.7	7.3	8,9	-4.3	-11,0	0	6	5	3
407	1852	1	1	33	429	534	2	0,6	8.7	7.3	8,9	-4.3	-11,0	1	4	5	3
408	1852	1	1	33	430	534	2	0,6	8.7	7.3	8,9	-4.3	-11,0	0	1	5	3
409	1852	1	1	33	431	534	2	0,6	8.7	7.3	8,9	-4.3	-11,0	0	4	5	3
410	1852	1	1	33	432	534	2	0,6	8.7	7.3	8,9	-4.3	-11,0	1	3	5	3
411	1852	1	1	33	433	534	2	0,6	8.7	7.3	8,9	-4.3	-11,0	0	3	5	3
412	1852	1	1	33	434	534	2	0,6	8.7	7.3	8,9	-4.3	-11,0	0	4	5	3
413	1852	1	1	33	435	534	2	0,6	8.7	7.3	8,9	-4.3	-11,0	0	3	3	3
414	1852	1	1	33	436	534	2	0,6	8.7	7.3	8,9	-4.3	-11,0	1	3	6	3
415	1852	1	1	33	437	534	2	0,6	8.7	7.3	8,9	-4.3	-11,0	1	3	6	3
416	1852	1	1	33	438	534	2	0,6	8.7	7.3	8,9	-4.3	-11,0	0	6	6	3
417	1852	2	1	49	439	534	0	2	8.7	8.5	7.3	-9	-4.3	0	4	1	2
418	1852	2	1	49	440	534	0	2	8.7	8.5	7.3	-9	-4.3	1	4	1	2
419	1852	2	1	49	441	534	0	2	8.7	8.5	7.3	-9	-4.3	1	3	1	1
420	1852	2	1	49	442	534	0	2	8.7	8.5	7.3	-9	-4.3	0	3	1	1
421	1852	2	1	49	443	534	0	2	8.7	8.5	7.3	-9	-4.3	1	3	1	1
422	1852	2	1	49	444	534	0	2	8.7	8.5	7.3	-9	-4.3	1	4	1	1
423	1852	2	1	49	445	534	0	2	8.7	8.5	7.3	-9	-4.3	1	3	1	2
424	1852	2	1	49	446	534	0	2	8.7	8.5	7.3	-9	-4.3	1	6	1	2
425	1852	2	1	49	447	534	0	2	8.7	8.5	7.3	-9	-4.3	1	1	2	2
426	1852	2	1	49	448	534	0	2	8.7	8.5	7.3	-9	-4.3	1	3	2	2
427	1852	2	1	49	449	534	0	2	8.7	8.5	7.3	-9	-4.3	0	3	2	2
428	1852	2	1	49	450	534	0	2	8.7	8.5	7.3	-9	-4.3	0	4	2	2
429	1852	2	1	49	451	534	0	2	8.7	8.5	7.3	-9	-4.3	0	3	3	3
430	1852	2	1	49	452	534	0	2	8.7	8.5	7.3	-9	-4.3	1	4	3	3
431	1852	2	1	49	453	534	0	2	8.7	8.5	7.3	-9	-4.3	1	3	5	3
432	1852	2	1	49	454	534	0	2	8.7	8.5	7.3	-9	-4.3	1	6	5	3
433	1852	2	1	49	455	534	0	2	8.7	8.5	7.3	-9	-4.3	0	1	5	3
434	1852	2	1	49	456	534	0	2	8.7	8.5	7.3	-9	-4.3	0	4	5	3
435	1852	2	1	49	457	534	0	2	8.7	8.5	7.3	-9	-4.3	1	3	5	3
436	1852	2	1	49	458	534	0	2	8.7	8.5	7.3	-9	-4.3	1	4	6	3
437	1852	2	1	49	459	534	0	2	8.7	8.5	7.3	-9	-4.3	0	3	6	3
438	1852	2	1	49	460	534	0	2	8.7	8.5	7.3	-9	-4.3	1	3	6	3
439	1852	2	1	49	461	534	0	2	8.7	8.5	7.3	-9	-4.3	1	4	6	3
440	1852	2	1	49	462	534	0	2	8.7	8.5	7.3	-9	-4.3	1	6	6	3
441	1852	2	1	49	463	534	0	2	8.7	8.5	7.3	-9	-4.3	1	6	6	3
442	1852	3	2	9	464	534	-0.4	0	8.7	17.6	8.5	-12.3	-9	1	6	1	2
443	1852	3	2	9	465	534	-0.4	0	8.7	17.6	8.5	-12.3	-9	0	3	1	2
444	1852	3	2	9	466	534	-0.4	0	8.7	17.6	8.5	-12.3	-9	0	6	1	2
445	1852	3	2	9	467	534	-0.4	0	8.7	17.6	8.5	-12.3	-9	0	1	2	2
446	1852	3	2	9	468	534	-0.4	0	8.7	17.6	8.5	-12.3	-9	0	3	2	2
447	1852	3	2	9	469	534	-0.4	0	8.7	17.6	8.5	-12.3	-9	0	6	2	2
448	1852	3	2	9	470	534	-0.4	0	8.7	17.6	8.5	-12.3	-9	0	3	2	2
449	1852	3	2	9	471	534	-0.4	0	8.7	17.6	8.5	-12.3	-9	1	1	2	2
450	1852	3	2	9	472	534	-0.4	0	8.7	17.6	8.5	-12.3	-9	1	6	2	2
451	1852	3	2	9	473	534	-0.4	0	8.7	17.6	8.5	-12.3	-9	0	6	2	2
452	1852	3	2	9	474	534	-0.4	0	8.7	17.6	8.5	-12.3	-9	0	6	2	2
453	1852	3	2	9	475	534	-0.4	0	8.7	17.6	8.5	-12.3	-9	1	6	2	2
454	1852	3	2	9	476	534	-0.4	0	8.7	17.6	8.5	-12.3	-9	1	4	2	2
455	1852	3	2	9	477	534	-0.4	0	8.7	17.6	8.5	-12.3	-9	0	6	2	2
456	1852	3	2	9	478	534	-0.4	0	8.7	17.6	8.5	-12.3	-9	1	3	3	3
457	1852	3	2	9	479	534	-0.4	0	8.7	17.6	8.5	-12.3	-9	1	3	3	3
458	1852	3	2	9	480	534	-0.4	0	8.7	17.6	8.5	-12.3	-9	0	6	3	3
459	1852	3	2	9	481	534	-0.4	0	8.7	17.6	8.5	-12.3	-9	0	4	3	3
460	1852	3	2	9	482	534	-0.4	0	8.7	17.6	8.5	-12.3	-9	1	4	3	3
461	1852	3	2	9	483	534	-0.4	0	8.7	17.6	8.5	-12.3	-9	0	3	3	3
462	1852	3	2	9	484	534	-0.4	0	8.7	17.6	8.5	-12.3	-9	0	3	3	3
463	1852	3	2	9	485	534	-0.4	0	8.7	17.6	8.5	-12.3	-9	0	1	3	3
464	1852	3	2	9	486	534	-0.4	0	8.7	17.6	8.5	-12.3	-9	1	5	4	3
465	1852	3	2	9	487	534	-0.4	0	8.7	17.6	8.5	-12.3	-9	0	3	4	3
466	1852	3	2	9	488	534	-0.4	0	8.7	17.6	8.5	-12.3	-9	0	3	4	3
467	1852	3	2	9	489	534	-0.4	0	8.7	17.6	8.5	-12.3	-9	0	4	4	3
468	1852	3	2	9	490	534	-0.4	0	8.7	17.6	8.5	-12.3	-9	0	5	5	3
469	1852	3	2	9	491	534	-0.4	0	8.7	17.6	8.5	-12.3	-9	0	1	5	3
470	1852	3	2	9	492	534	-0.4	0	8.7	17.6	8.5	-12.3	-9	0	1	5	3
471	1852	3	2	9	493	534	-0.4	0	8.7	17.6	8.5	-12.3	-9	1	6	5	3
472	1852	3	2	9	494	534	-0.4	0	8.7	17.6	8.5	-12.3	-9	1	3	5	3
473	1852	3	2	9	495	534	-0.4	0	8.7	17.6	8.5	-12.3	-9	0	3	5	3
474	1852	3	2	9	496	534	-0.4	0	8.7	17.6	8.5	-12.3	-9	1	3	5	3
475	1852	3	2	9	497	534	-0.4	0	8.7	17.6	8.5	-12.3	-9	0	4	5	3
476	1852	3	2	9	498	534	-0.4	0	8.7	17.6	8.5	-12.3	-9	1	4	5	3
477	1852	3	2	9	499	534	-0.4	0	8.7	17.6	8.5	-12.3	-9	1	1	6	3
478	1852	3	2	9	500	534	-0.4	0	8.7	17.6	8.5	-12.3	-9	0	6	6	3
479	1852	4	2	16	501	534	3.5	-0.4	8.7	18.8	17.6	-6.5	-12.3	1	4	1	1
480	1852	4	2	16	502	534	3.5	-0.4	8.7	18.8	17.6	-6.5	-12.3	1	3	1	2
481	1852	4	2	16	503	534	3.5	-0.4	8.7	18.8	17.6	-6.5	-12.3	0	3	1	2
482	1852	4	2	16	504	534	3.5	-0.4	8.7	18.8	17.6	-6.5	-12.3	1	6	1	2
483	1852	4	2	16	505	534	3.5	-0.4	8.7	18.8	17.6	-6.5	-12.3	1	6	1	2
484	1852	4	2	16	506	534	3.5	-0.4	8.7	18.8	17.6	-6.5	-12.3	0	3	2	2
485	1852	4	2	16	507	534	3.5	-0.4	8.7	18.8	17.6	-6.5	-12.3	1	3	2	2
486	1852	4	2	16	508	534	3.5	-0.4	8.7	18.8	17.6	-6.5	-12.3	1	6	2	2
487	1852	4	2	16	509	534	3.5	-0.4	8.7	18.8	17.6	-6.5	-12.3	1	6	2	2
488	1852	4	2	16	510	534	3.5	-0.4	8.7	18.8	17.6	-6.5	-12.3	1	4	2	2
489	1852	4	2	16	511	534	3.5	-0.4	8.7	18.8	17.6	-6.5	-12.3	1	4	2	2
490	1852	4	2	16	512	534	3.5	-0.4	8.7	18.8	17.6	-6.5	-12.3	1	6	2	2
491	1852	4	2	16	513	534	3.5	-0.4	8.7	18.8	17.6	-6.5	-12.3	0	6	3	3
492	1852	4	2	16	514	534	3.5	-0.4	8.7	18.8	17.6	-6.5	-12.3	0	1	3	3
493	1852	4	2	16	515	534	3.5	-0.4	8.7	18.8	17.6	-6.5	-12.3	0	6	3	3
494	1852	4	2	16	516	534	3.5	-0.4	8.7	18.8	17.6	-6.5	-12.3	0	3	4	3
495	1852	4	2	16	517	534	3.5	-0.4	8.7	18.8	17.6	-6.5	-12.3	1	6	4	3
496	1852	4	2	16	518	534	3.5	-0.4	8.7	18.8	17.6	-6.5	-12.3	1	3	5	3
497	1852	4	2	16	519	534	3.5	-0.4	8.7	18.8	17.6	-6.5	-12.3	0	3	5	3
498	1852	4	2	16	520	534	3.5	-0.4	8.7	18.8	17.6	-6.5	-12.3	0	4	5	3
499	1852	4	2	16	521	534	3.5	-0.4	8.7	18.8	17.6	-6.5	-12.3	1	4	5	3
500	1852	4	2	16	522	534	3.5	-0.4	8.7	18.8	17.6	-6.5	-12.3	1	3	5	3
501	1852	4	2	16	523	534	3.5	-0.4	8.7	18.8	17.6	-6.5	-12.3	1	6	5	3
502	1852	4	2	16	524	534	3.5	-0.4	8.7	18.8	17.6	-6.5	-12.3	0	3	5	3
503	1852	4	2	16	525	534	3.5	-0.4	8.7	18.8	17.6	-6.5	-12.3	0	4	5	3
504	1852	4	2	16	526	534	3.5	-0.4	8.7	18.8	17.6	-6.5	-12.3	1	3	5	3
505	1852	4	2	16	527	534	3.5	-0.4	8.7	18.8	17.6	-6.5	-12.3	0	1	5	3
506	1852	4	2	16	528	534	3.5	-0.4	8.7	18.8	17.6	-6.5	-12.3	0	4	5	3
507	1852	4	2	16	529	534	3.5	-0.4	8.7	18.8	17.6	-6.5	-12.3	1	5	6	3
508	1852	4	2	16	530	534	3.5	-0.4	8.7	18.8	17.6	-6.5	-12.3	1	6	6	3
509	1852	4	2	16	531	534	3.5	-0.4	8.7	18.8	17.6	-6.5	-12.3	0	6	6	3
510	1852	5	2	36	532	534	13.6	3.5	8.7	28.5	18.8	1.5	-6.5	1	3	1	2
511	1852	5	2	36	533	534	13.6	3.5	8.7	28.5	18.8	1.5	-6.5	1	3	1	2
512	1852	5	2	36	534	534	13.6	3.5	8.7	28.5	18.8	1.5	-6.5	1	3	1	2
513	1852	5	2	36	535	534	13.6	3.5	8.7	28.5	18.8	1.5	-6.5	1	4	1	2
514	1852	5	2	36	536	534	13.6	3.5	8.7	28.5	18.8	1.5	-6.5	0	6	1	2
515	1852	5	2	36	537	534	13.6	3.5	8.7	28.5	18.8	1.5	-6.5	1	3	2	2
516	1852	5	2	36	538	534	13.6	3.5	8.7	28.5	18.8	1.5	-6.5	1	6	2	2
517	1852	5	2	36	539	534	13.6	3.5	8.7	28.5	18.8	1.5	-6.5	1	4	3	3
518	1852	5	2	36	540	534	13.6	3.5	8.7	28.5	18.8	1.5	-6.5	0	3	3	3
519	1852	5	2	36	541	534	13.6	3.5	8.7	28.5	18.8	1.5	-6.5	1	1	3	3
520	1852	5	2	36	542	534	13.6	3.5	8.7	28.5	18.8	1.5	-6.5	0	3	4	3
521	1852	5	2	36	543	534	13.6	3.5	8.7	28.5	18.8	1.5	-6.5	1	3	4	3
522	1852	5	2	36	544	534	13.6	3.5	8.7	28.5	18.8	1.5	-6.5	1	1	4	3
523	1852	5	2	36	545	534	13.6	3.5	8.7	28.5	18.8	1.5	-6.5	1	6	4	3
524	1852	5	2	36	546	534	13.6	3.5	8.7	28.5	18.8	1.5	-6.5	1	4	4	3
525	1852	5	2	36	547	534	13.6	3.5	8.7	28.5	18.8	1.5	-6.5	0	6	5	3
526	1852	5	2	36	548	534	13.6	3.5	8.7	28.5	18.8	1.5	-6.5	1	3	5	3
527	1852	5	2	36	549	534	13.6	3.5	8.7	28.5	18.8	1.5	-6.5	0	6	5	3
528	1852	5	2	36	550	534	13.6	3.5	8.7	28.5	18.8	1.5	-6.5	1	4	5	3
529	1852	5	2	36	551	534	13.6	3.5	8.7	28.5	18.8	1.5	-6.5	1	4	5	3
530	1852	5	2	36	552	534	13.6	3.5	8.7	28.5	18.8	1.5	-6.5	0	4	5	3
531	1852	5	2	36	553	534	13.6	3.5	8.7	28.5	18.8	1.5	-6.5	1	4	5	3
532	1852	5	2	36	554	534	13.6	3.5	8.7	28.5	18.8	1.5	-6.5	1	6	5	3
533	1852	5	2	36	555	534	13.6	3.5	8.7	28.5	18.8	1.5	-6.5	1	6	6	3
534	1852	5	2	36	556	534	13.6	3.5	8.7	28.5	18.8	1.5	-6.5	0	1	6	3
535	1852	5	2	36	557	534	13.6	3.5	8.7	28.5	18.8	1.5	-6.5	1	4	6	3
536	1852	6	3	81	558	534	18	13.6	8.7	29.5	28.5	10.3	1.5	1	6	1	2
537	1852	6	3	81	559	534	18	13.6	8.7	29.5	28.5	10.3	1.5	0	6	1	2
538	1852	6	3	81	560	534	18	13.6	8.7	29.5	28.5	10.3	1.5	1	6	1	2
539	1852	6	3	81	561	534	18	13.6	8.7	29.5	28.5	10.3	1.5	1	3	1	2
540	1852	6	3	81	562	534	18	13.6	8.7	29.5	28.5	10.3	1.5	1	3	1	2
541	1852	6	3	81	563	534	18	13.6	8.7	29.5	28.5	10.3	1.5	0	3	1	2
542	1852	6	3	81	564	534	18	13.6	8.7	29.5	28.5	10.3	1.5	1	3	1	2
543	1852	6	3	81	565	534	18	13.6	8.7	29.5	28.5	10.3	1.5	1	3	1	2
544	1852	6	3	81	566	534	18	13.6	8.7	29.5	28.5	10.3	1.5	0	6	1	2
545	1852	6	3	81	567	534	18	13.6	8.7	29.5	28.5	10.3	1.5	1	6	1	2
546	1852	6	3	81	568	534	18	13.6	8.7	29.5	28.5	10.3	1.5	0	3	2	2
547	1852	6	3	81	569	534	18	13.6	8.7	29.5	28.5	10.3	1.5	1	3	2	2
548	1852	6	3	81	570	534	18	13.6	8.7	29.5	28.5	10.3	1.5	0	3	2	2
549	1852	6	3	81	571	534	18	13.6	8.7	29.5	28.5	10.3	1.5	1	3	2	2
550	1852	6	3	81	572	534	18	13.6	8.7	29.5	28.5	10.3	1.5	0	6	2	2
551	1852	6	3	81	573	534	18	13.6	8.7	29.5	28.5	10.3	1.5	0	6	2	2
552	1852	6	3	81	574	534	18	13.6	8.7	29.5	28.5	10.3	1.5	0	6	2	2
553	1852	6	3	81	575	534	18	13.6	8.7	29.5	28.5	10.3	1.5	1	4	2	2
554	1852	6	3	81	576	534	18	13.6	8.7	29.5	28.5	10.3	1.5	1	1	3	3
555	1852	6	3	81	577	534	18	13.6	8.7	29.5	28.5	10.3	1.5	0	3	3	3
556	1852	6	3	81	578	534	18	13.6	8.7	29.5	28.5	10.3	1.5	0	3	3	3
557	1852	6	3	81	579	534	18	13.6	8.7	29.5	28.5	10.3	1.5	1	5	4	3
558	1852	6	3	81	580	534	18	13.6	8.7	29.5	28.5	10.3	1.5	0	1	4	3
559	1852	6	3	81	581	534	18	13.6	8.7	29.5	28.5	10.3	1.5	1	3	4	3
560	1852	6	3	81	582	534	18	13.6	8.7	29.5	28.5	10.3	1.5	0	6	4	3
561	1852	6	3	81	583	534	18	13.6	8.7	29.5	28.5	10.3	1.5	1	6	5	3
562	1852	6	3	81	584	534	18	13.6	8.7	29.5	28.5	10.3	1.5	0	3	5	3
563	1852	6	3	81	585	534	18	13.6	8.7	29.5	28.5	10.3	1.5	0	3	5	3
564	1852	6	3	81	586	534	18	13.6	8.7	29.5	28.5	10.3	1.5	0	6	5	3
565	1852	6	3	81	587	534	18	13.6	8.7	29.5	28.5	10.3	1.5	0	6	5	3
566	1852	6	3	81	588	534	18	13.6	8.7	29.5	28.5	10.3	1.5	0	1	5	3
567	1852	6	3	81	589	534	18	13.6	8.7	29.5	28.5	10.3	1.5	0	6	5	3
568	1852	6	3	81	590	534	18	13.6	8.7	29.5	28.5	10.3	1.5	1	6	5	3
569	1852	6	3	81	591	534	18	13.6	8.7	29.5	28.5	10.3	1.5	0	4	5	3
570	1852	6	3	81	592	534	18	13.6	8.7	29.5	28.5	10.3	1.5	1	3	5	3
571	1852	6	3	81	593	534	18	13.6	8.7	29.5	28.5	10.3	1.5	1	6	6	3
572	1852	6	3	81	594	534	18	13.6	8.7	29.5	28.5	10.3	1.5	1	3	6	3
573	1852	7	3	26	595	534	20	18	8.7	30	29.5	13	10.3	0	3	1	1
574	1852	7	3	26	596	534	20	18	8.7	30	29.5	13	10.3	0	3	1	1
575	1852	7	3	26	597	534	20	18	8.7	30	29.5	13	10.3	0	3	1	1
576	1852	7	3	26	598	534	20	18	8.7	30	29.5	13	10.3	1	3	1	1
577	1852	7	3	26	599	534	20	18	8.7	30	29.5	13	10.3	1	3	1	1
578	1852	7	3	26	600	534	20	18	8.7	30	29.5	13	10.3	1	6	1	2
579	1852	7	3	26	601	534	20	18	8.7	30	29.5	13	10.3	1	3	1	2
580	1852	7	3	26	602	534	20	18	8.7	30	29.5	13	10.3	0	6	1	2
581	1852	7	3	26	603	534	20	18	8.7	30	29.5	13	10.3	1	6	1	2
582	1852	7	3	26	604	534	20	18	8.7	30	29.5	13	10.3	1	6	1	2
583	1852	7	3	26	605	534	20	18	8.7	30	29.5	13	10.3	1	6	1	2
584	1852	7	3	26	606	534	20	18	8.7	30	29.5	13	10.3	1	6	1	2
585	1852	7	3	26	607	534	20	18	8.7	30	29.5	13	10.3	1	6	1	2
586	1852	7	3	26	608	534	20	18	8.7	30	29.5	13	10.3	0	1	2	2
587	1852	7	3	26	609	534	20	18	8.7	30	29.5	13	10.3	1	1	2	2
588	1852	7	3	26	610	534	20	18	8.7	30	29.5	13	10.3	0	3	2	2
589	1852	7	3	26	611	534	20	18	8.7	30	29.5	13	10.3	0	4	2	2
590	1852	7	3	26	612	534	20	18	8.7	30	29.5	13	10.3	0	4	2	2
591	1852	7	3	26	613	534	20	18	8.7	30	29.5	13	10.3	1	4	2	2
592	1852	7	3	26	614	534	20	18	8.7	30	29.5	13	10.3	1	4	3	3
593	1852	7	3	26	615	534	20	18	8.7	30	29.5	13	10.3	1	4	3	3
594	1852	7	3	26	616	534	20	18	8.7	30	29.5	13	10.3	0	5	3	3
595	1852	7	3	26	617	534	20	18	8.7	30	29.5	13	10.3	0	6	3	3
596	1852	7	3	26	618	534	20	18	8.7	30	29.5	13	10.3	0	3	3	3
597	1852	7	3	26	619	534	20	18	8.7	30	29.5	13	10.3	1	3	4	3
598	1852	7	3	26	620	534	20	18	8.7	30	29.5	13	10.3	0	4	4	3
599	1852	7	3	26	621	534	20	18	8.7	30	29.5	13	10.3	1	4	5	3
600	1852	7	3	26	622	534	20	18	8.7	30	29.5	13	10.3	1	3	5	3
601	1852	7	3	26	623	534	20	18	8.7	30	29.5	13	10.3	1	3	5	3
602	1852	7	3	26	624	534	20	18	8.7	30	29.5	13	10.3	1	3	5	3
603	1852	7	3	26	625	534	20	18	8.7	30	29.5	13	10.3	1	4	5	3
604	1852	7	3	26	626	534	20	18	8.7	30	29.5	13	10.3	1	3	5	3
605	1852	7	3	26	627	534	20	18	8.7	30	29.5	13	10.3	1	3	5	3
606	1852	7	3	26	628	534	20	18	8.7	30	29.5	13	10.3	0	4	6	3
607	1852	7	3	26	629	534	20	18	8.7	30	29.5	13	10.3	0	3	6	3
608	1852	7	3	26	630	534	20	18	8.7	30	29.5	13	10.3	0	3	6	3
609	1852	8	3	112	631	534	18.4	20	8.7	28.5	30	10.1	13	1	1	1	1
610	1852	8	3	112	632	534	18.4	20	8.7	28.5	30	10.1	13	0	1	1	1
611	1852	8	3	112	633	534	18.4	20	8.7	28.5	30	10.1	13	0	1	1	1
612	1852	8	3	112	634	534	18.4	20	8.7	28.5	30	10.1	13	0	1	1	1
613	1852	8	3	112	635	534	18.4	20	8.7	28.5	30	10.1	13	1	1	1	1
614	1852	8	3	112	636	534	18.4	20	8.7	28.5	30	10.1	13	0	1	1	1
615	1852	8	3	112	637	534	18.4	20	8.7	28.5	30	10.1	13	0	1	1	1
616	1852	8	3	112	638	534	18.4	20	8.7	28.5	30	10.1	13	1	3	1	1
617	1852	8	3	112	639	534	18.4	20	8.7	28.5	30	10.1	13	1	3	1	1
618	1852	8	3	112	640	534	18.4	20	8.7	28.5	30	10.1	13	1	3	1	1
619	1852	8	3	112	641	534	18.4	20	8.7	28.5	30	10.1	13	1	3	1	1
620	1852	8	3	112	642	534	18.4	20	8.7	28.5	30	10.1	13	0	3	1	1
621	1852	8	3	112	643	534	18.4	20	8.7	28.5	30	10.1	13	0	3	1	1
622	1852	8	3	112	644	534	18.4	20	8.7	28.5	30	10.1	13	1	3	1	1
623	1852	8	3	112	645	534	18.4	20	8.7	28.5	30	10.1	13	1	3	1	1
624	1852	8	3	112	646	534	18.4	20	8.7	28.5	30	10.1	13	1	3	1	1
625	1852	8	3	112	647	534	18.4	20	8.7	28.5	30	10.1	13	1	3	1	1
626	1852	8	3	112	648	534	18.4	20	8.7	28.5	30	10.1	13	1	3	1	1
627	1852	8	3	112	649	534	18.4	20	8.7	28.5	30	10.1	13	1	3	1	1
628	1852	8	3	112	650	534	18.4	20	8.7	28.5	30	10.1	13	0	3	1	1
629	1852	8	3	112	651	534	18.4	20	8.7	28.5	30	10.1	13	1	3	1	1
630	1852	8	3	112	652	534	18.4	20	8.7	28.5	30	10.1	13	1	3	1	1
631	1852	8	3	112	653	534	18.4	20	8.7	28.5	30	10.1	13	1	3	1	1
632	1852	8	3	112	654	534	18.4	20	8.7	28.5	30	10.1	13	0	3	1	1
633	1852	8	3	112	655	534	18.4	20	8.7	28.5	30	10.1	13	1	3	1	1
634	1852	8	3	112	656	534	18.4	20	8.7	28.5	30	10.1	13	1	3	1	1
635	1852	8	3	112	657	534	18.4	20	8.7	28.5	30	10.1	13	1	3	1	1
636	1852	8	3	112	658	534	18.4	20	8.7	28.5	30	10.1	13	0	3	1	1
637	1852	8	3	112	659	534	18.4	20	8.7	28.5	30	10.1	13	0	3	1	1
638	1852	8	3	112	660	534	18.4	20	8.7	28.5	30	10.1	13	1	3	1	1
639	1852	8	3	112	661	534	18.4	20	8.7	28.5	30	10.1	13	0	3	1	1
640	1852	8	3	112	662	534	18.4	20	8.7	28.5	30	10.1	13	0	3	1	1
641	1852	8	3	112	663	534	18.4	20	8.7	28.5	30	10.1	13	0	3	1	1
642	1852	8	3	112	664	534	18.4	20	8.7	28.5	30	10.1	13	0	3	1	1
643	1852	8	3	112	665	534	18.4	20	8.7	28.5	30	10.1	13	1	3	1	1
644	1852	8	3	112	666	534	18.4	20	8.7	28.5	30	10.1	13	1	3	1	1
645	1852	8	3	112	667	534	18.4	20	8.7	28.5	30	10.1	13	0	3	1	1
646	1852	8	3	112	668	534	18.4	20	8.7	28.5	30	10.1	13	0	3	1	1
647	1852	8	3	112	669	534	18.4	20	8.7	28.5	30	10.1	13	1	3	1	1
648	1852	8	3	112	670	534	18.4	20	8.7	28.5	30	10.1	13	1	3	1	1
649	1852	8	3	112	671	534	18.4	20	8.7	28.5	30	10.1	13	1	3	1	1
650	1852	8	3	112	672	534	18.4	20	8.7	28.5	30	10.1	13	1	3	1	1
651	1852	8	3	112	673	534	18.4	20	8.7	28.5	30	10.1	13	0	3	1	1
652	1852	8	3	112	674	534	18.4	20	8.7	28.5	30	10.1	13	0	3	1	1
653	1852	8	3	112	675	534	18.4	20	8.7	28.5	30	10.1	13	0	3	1	1
654	1852	8	3	112	676	534	18.4	20	8.7	28.5	30	10.1	13	1	3	1	1
655	1852	8	3	112	677	534	18.4	20	8.7	28.5	30	10.1	13	0	3	1	1
656	1852	8	3	112	678	534	18.4	20	8.7	28.5	30	10.1	13	0	3	1	1
657	1852	8	3	112	679	534	18.4	20	8.7	28.5	30	10.1	13	0	3	1	1
658	1852	8	3	112	680	534	18.4	20	8.7	28.5	30	10.1	13	0	3	1	1
659	1852	8	3	112	681	534	18.4	20	8.7	28.5	30	10.1	13	1	3	1	1
660	1852	8	3	112	682	534	18.4	20	8.7	28.5	30	10.1	13	1	3	1	1
661	1852	8	3	112	683	534	18.4	20	8.7	28.5	30	10.1	13	1	3	1	1
662	1852	8	3	112	684	534	18.4	20	8.7	28.5	30	10.1	13	0	3	1	1
663	1852	8	3	112	685	534	18.4	20	8.7	28.5	30	10.1	13	0	3	1	1
664	1852	8	3	112	686	534	18.4	20	8.7	28.5	30	10.1	13	0	3	1	1
665	1852	8	3	112	687	534	18.4	20	8.7	28.5	30	10.1	13	0	3	1	1
666	1852	8	3	112	688	534	18.4	20	8.7	28.5	30	10.1	13	0	3	1	1
667	1852	8	3	112	689	534	18.4	20	8.7	28.5	30	10.1	13	0	3	1	1
668	1852	8	3	112	690	534	18.4	20	8.7	28.5	30	10.1	13	1	3	1	1
669	1852	8	3	112	691	534	18.4	20	8.7	28.5	30	10.1	13	0	3	1	1
670	1852	8	3	112	692	534	18.4	20	8.7	28.5	30	10.1	13	1	3	1	1
671	1852	8	3	112	693	534	18.4	20	8.7	28.5	30	10.1	13	0	3	1	1
672	1852	8	3	112	694	534	18.4	20	8.7	28.5	30	10.1	13	0	3	1	1
673	1852	8	3	112	695	534	18.4	20	8.7	28.5	30	10.1	13	1	3	1	1
674	1852	8	3	112	696	534	18.4	20	8.7	28.5	30	10.1	13	1	3	1	1
675	1852	8	3	112	697	534	18.4	20	8.7	28.5	30	10.1	13	0	3	1	1
676	1852	8	3	112	698	534	18.4	20	8.7	28.5	30	10.1	13	0	3	1	1
677	1852	8	3	112	699	534	18.4	20	8.7	28.5	30	10.1	13	1	3	1	1
678	1852	8	3	112	700	534	18.4	20	8.7	28.5	30	10.1	13	0	3	1	1
679	1852	8	3	112	701	534	18.4	20	8.7	28.5	30	10.1	13	0	3	1	1
680	1852	8	3	112	702	534	18.4	20	8.7	28.5	30	10.1	13	0	3	1	1
681	1852	8	3	112	703	534	18.4	20	8.7	28.5	30	10.1	13	1	3	1	1
682	1852	8	3	112	704	534	18.4	20	8.7	28.5	30	10.1	13	0	3	1	1
683	1852	8	3	112	705	534	18.4	20	8.7	28.5	30	10.1	13	0	3	1	1
684	1852	8	3	112	706	534	18.4	20	8.7	28.5	30	10.1	13	0	3	1	1
685	1852	8	3	112	707	534	18.4	20	8.7	28.5	30	10.1	13	1	3	1	1
686	1852	8	3	112	708	534	18.4	20	8.7	28.5	30	10.1	13	0	3	1	1
687	1852	8	3	112	709	534	18.4	20	8.7	28.5	30	10.1	13	1	3	1	1
688	1852	8	3	112	710	534	18.4	20	8.7	28.5	30	10.1	13	1	3	1	1
689	1852	8	3	112	711	534	18.4	20	8.7	28.5	30	10.1	13	1	3	1	1
690	1852	8	3	112	712	534	18.4	20	8.7	28.5	30	10.1	13	1	3	1	1
691	1852	8	3	112	713	534	18.4	20	8.7	28.5	30	10.1	13	1	3	1	1
692	1852	8	3	112	714	534	18.4	20	8.7	28.5	30	10.1	13	0	3	1	1
693	1852	8	3	112	715	534	18.4	20	8.7	28.5	30	10.1	13	0	3	1	1
694	1852	8	3	112	716	534	18.4	20	8.7	28.5	30	10.1	13	1	3	1	1
695	1852	8	3	112	717	534	18.4	20	8.7	28.5	30	10.1	13	1	3	1	1
696	1852	8	3	112	718	534	18.4	20	8.7	28.5	30	10.1	13	0	3	1	1
697	1852	8	3	112	719	534	18.4	20	8.7	28.5	30	10.1	13	1	3	1	1
698	1852	8	3	112	720	534	18.4	20	8.7	28.5	30	10.1	13	0	3	1	1
699	1852	8	3	112	721	534	18.4	20	8.7	28.5	30	10.1	13	1	3	1	1
700	1852	8	3	112	722	534	18.4	20	8.7	28.5	30	10.1	13	0	3	1	1
701	1852	8	3	112	723	534	18.4	20	8.7	28.5	30	10.1	13	0	3	1	1
702	1852	8	3	112	724	534	18.4	20	8.7	28.5	30	10.1	13	0	3	1	1
703	1852	8	3	112	725	534	18.4	20	8.7	28.5	30	10.1	13	0	3	1	1
704	1852	8	3	112	726	534	18.4	20	8.7	28.5	30	10.1	13	0	3	1	1
705	1852	8	3	112	727	534	18.4	20	8.7	28.5	30	10.1	13	1	3	1	1
706	1852	8	3	112	728	534	18.4	20	8.7	28.5	30	10.1	13	1	3	1	1
707	1852	8	3	112	729	534	18.4	20	8.7	28.5	30	10.1	13	0	3	1	1
708	1852	8	3	112	730	534	18.4	20	8.7	28.5	30	10.1	13	0	3	1	1
709	1852	8	3	112	731	534	18.4	20	8.7	28.5	30	10.1	13	1	3	1	1
710	1852	8	3	112	732	534	18.4	20	8.7	28.5	30	10.1	13	1	3	1	1
711	1852	8	3	112	733	534	18.4	20	8.7	28.5	30	10.1	13	1	3	1	1
712	1852	8	3	112	734	534	18.4	20	8.7	28.5	30	10.1	13	0	3	1	1
713	1852	8	3	112	735	534	18.4	20	8.7	28.5	30	10.1	13	0	3	1	1
714	1852	8	3	112	736	534	18.4	20	8.7	28.5	30	10.1	13	1	3	1	1
715	1852	8	3	112	737	534	18.4	20	8.7	28.5	30	10.1	13	1	3	1	1
716	1852	8	3	112	738	534	18.4	20	8.7	28.5	30	10.1	13	0	3	1	1
717	1852	8	3	112	739	534	18.4	20	8.7	28.5	30	10.1	13	1	3	1	1
718	1852	8	3	112	740	534	18.4	20	8.7	28.5	30	10.1	13	0	3	1	1
719	1852	8	3	112	741	534	18.4	20	8.7	28.5	30	10.1	13	1	3	1	1
720	1852	8	3	112	742	534	18.4	20	8.7	28.5	30	10.1	13	0	3	1	1
721	1852	8	3	112	743	534	18.4	20	8.7	28.5	30	10.1	13	1	3	1	1
722	1852	8	3	112	744	534	18.4	20	8.7	28.5	30	10.1	13	1	3	1	1
723	1852	8	3	112	745	534	18.4	20	8.7	28.5	30	10.1	13	0	3	1	1
724	1852	8	3	112	746	534	18.4	20	8.7	28.5	30	10.1	13	0	3	1	1
725	1852	8	3	112	747	534	18.4	20	8.7	28.5	30	10.1	13	1	3	1	1
726	1852	8	3	112	748	534	18.4	20	8.7	28.5	30	10.1	13	0	3	1	1
727	1852	8	3	112	749	534	18.4	20	8.7	28.5	30	10.1	13	0	3	1	1
728	1852	8	3	112	750	534	18.4	20	8.7	28.5	30	10.1	13	1	3	1	1
729	1852	8	3	112	751	534	18.4	20	8.7	28.5	30	10.1	13	1	3	1	1
730	1852	8	3	112	752	534	18.4	20	8.7	28.5	30	10.1	13	1	3	1	1
731	1852	8	3	112	753	534	18.4	20	8.7	28.5	30	10.1	13	1	3	1	1
732	1852	8	3	112	754	534	18.4	20	8.7	28.5	30	10.1	13	1	3	1	1
733	1852	8	3	112	755	534	18.4	20	8.7	28.5	30	10.1	13	1	3	1	1
734	1852	8	3	112	756	534	18.4	20	8.7	28.5	30	10.1	13	0	3	1	1
735	1852	8	3	112	757	534	18.4	20	8.7	28.5	30	10.1	13	0	3	1	1
736	1852	8	3	112	758	534	18.4	20	8.7	28.5	30	10.1	13	1	3	1	1
737	1852	8	3	112	759	534	18.4	20	8.7	28.5	30	10.1	13	0	3	1	1
738	1852	8	3	112	760	534	18.4	20	8.7	28.5	30	10.1	13	0	3	1	1
739	1852	8	3	112	761	534	18.4	20	8.7	28.5	30	10.1	13	0	3	1	1
740	1852	8	3	112	762	534	18.4	20	8.7	28.5	30	10.1	13	1	3	1	1
741	1852	8	3	112	763	534	18.4	20	8.7	28.5	30	10.1	13	1	3	1	1
742	1852	8	3	112	764	534	18.4	20	8.7	28.5	30	10.1	13	1	3	1	1
743	1852	8	3	112	765	534	18.4	20	8.7	28.5	30	10.1	13	1	3	1	1
744	1852	8	3	112	766	534	18.4	20	8.7	28.5	30	10.1	13	0	3	1	1
745	1852	8	3	112	767	534	18.4	20	8.7	28.5	30	10.1	13	0	3	1	1
746	1852	8	3	112	768	534	18.4	20	8.7	28.5	30	10.1	13	0	3	1	1
747	1852	8	3	112	769	534	18.4	20	8.7	28.5	30	10.1	13	1	3	1	1
748	1852	8	3	112	770	534	18.4	20	8.7	28.5	30	10.1	13	1	3	1	1
749	1852	8	3	112	771	534	18.4	20	8.7	28.5	30	10.1	13	0	3	1	1
750	1852	8	3	112	772	534	18.4	20	8.7	28.5	30	10.1	13	1	3	1	1
751	1852	8	3	112	773	534	18.4	20	8.7	28.5	30	10.1	13	1	3	1	1
752	1852	8	3	112	774	534	18.4	20	8.7	28.5	30	10.1	13	1	3	1	1
753	1852	8	3	112	775	534	18.4	20	8.7	28.5	30	10.1	13	1	3	1	1
754	1852	8	3	112	776	534	18.4	20	8.7	28.5	30	10.1	13	0	3	1	1
755	1852	8	3	112	777	534	18.4	20	8.7	28.5	30	10.1	13	1	3	1	1
756	1852	8	3	112	778	534	18.4	20	8.7	28.5	30	10.1	13	1	3	1	1
757	1852	8	3	112	779	534	18.4	20	8.7	28.5	30	10.1	13	0	3	1	1
758	1852	8	3	112	780	534	18.4	20	8.7	28.5	30	10.1	13	1	3	1	1
759	1852	8	3	112	781	534	18.4	20	8.7	28.5	30	10.1	13	1	3	1	1
760	1852	8	3	112	782	534	18.4	20	8.7	28.5	30	10.1	13	1	3	1	1
761	1852	8	3	112	783	534	18.4	20	8.7	28.5	30	10.1	13	1	3	1	1
762	1852	8	3	112	784	534	18.4	20	8.7	28.5	30	10.1	13	0	3	1	1
763	1852	8	3	112	785	534	18.4	20	8.7	28.5	30	10.1	13	1	3	1	1
764	1852	8	3	112	786	534	18.4	20	8.7	28.5	30	10.1	13	0	3	1	1
765	1852	8	3	112	787	534	18.4	20	8.7	28.5	30	10.1	13	0	3	1	1
766	1852	8	3	112	788	534	18.4	20	8.7	28.5	30	10.1	13	1	3	1	1
767	1852	8	3	112	789	534	18.4	20	8.7	28.5	30	10.1	13	0	3	1	1
768	1852	8	3	112	790	534	18.4	20	8.7	28.5	30	10.1	13	0	3	1	1
769	1852	8	3	112	791	534	18.4	20	8.7	28.5	30	10.1	13	0	3	1	1
770	1852	8	3	112	792	534	18.4	20	8.7	28.5	30	10.1	13	0	3	1	1
771	1852	8	3	112	793	534	18.4	20	8.7	28.5	30	10.1	13	1	3	1	1
772	1852	8	3	112	794	534	18.4	20	8.7	28.5	30	10.1	13	0	3	1	1
773	1852	8	3	112	795	534	18.4	20	8.7	28.5	30	10.1	13	0	3	1	1
774	1852	8	3	112	796	534	18.4	20	8.7	28.5	30	10.1	13	0	3	1	1
775	1852	8	3	112	797	534	18.4	20	8.7	28.5	30	10.1	13	1	3	1	1
776	1852	8	3	112	798	534	18.4	20	8.7	28.5	30	10.1	13	0	3	1	1
777	1852	8	3	112	799	534	18.4	20	8.7	28.5	30	10.1	13	0	3	1	1
778	1852	8	3	112	800	534	18.4	20	8.7	28.5	30	10.1	13	1	3	1	1
779	1852	8	3	112	801	534	18.4	20	8.7	28.5	30	10.1	13	0	3	1	1
780	1852	8	3	112	802	534	18.4	20	8.7	28.5	30	10.1	13	1	3	1	1
781	1852	8	3	112	803	534	18.4	20	8.7	28.5	30	10.1	13	1	3	1	1
782	1852	8	3	112	804	534	18.4	20	8.7	28.5	30	10.1	13	1	3	1	1
783	1852	8	3	112	805	534	18.4	20	8.7	28.5	30	10.1	13	0	3	1	1
784	1852	8	3	112	806	534	18.4	20	8.7	28.5	30	10.1	13	1	3	1	1
785	1852	8	3	112	807	534	18.4	20	8.7	28.5	30	10.1	13	1	3	1	1
786	1852	8	3	112	808	534	18.4	20	8.7	28.5	30	10.1	13	0	3	1	1
787	1852	8	3	112	809	534	18.4	20	8.7	28.5	30	10.1	13	1	3	1	1
788	1852	8	3	112	810	534	18.4	20	8.7	28.5	30	10.1	13	1	1	1	1
789	1852	8	3	112	811	534	18.4	20	8.7	28.5	30	10.1	13	1	1	1	1
790	1852	8	3	112	812	534	18.4	20	8.7	28.5	30	10.1	13	1	1	1	1
791	1852	8	3	112	813	534	18.4	20	8.7	28.5	30	10.1	13	0	3	1	1
792	1852	8	3	112	814	534	18.4	20	8.7	28.5	30	10.1	13	1	4	1	1
793	1852	8	3	112	815	534	18.4	20	8.7	28.5	30	10.1	13	1	4	1	1
794	1852	8	3	112	816	534	18.4	20	8.7	28.5	30	10.1	13	1	4	1	1
795	1852	8	3	112	817	534	18.4	20	8.7	28.5	30	10.1	13	0	4	1	1
796	1852	8	3	112	818	534	18.4	20	8.7	28.5	30	10.1	13	0	4	1	1
797	1852	8	3	112	819	534	18.4	20	8.7	28.5	30	10.1	13	0	4	1	1
798	1852	8	3	112	820	534	18.4	20	8.7	28.5	30	10.1	13	0	4	1	1
799	1852	8	3	112	821	534	18.4	20	8.7	28.5	30	10.1	13	0	4	1	1
800	1852	8	3	112	822	534	18.4	20	8.7	28.5	30	10.1	13	0	4	1	1
801	1852	8	3	112	823	534	18.4	20	8.7	28.5	30	10.1	13	0	4	1	1
802	1852	8	3	112	824	534	18.4	20	8.7	28.5	30	10.1	13	0	4	1	1
803	1852	8	3	112	825	534	18.4	20	8.7	28.5	30	10.1	13	0	4	1	1
804	1852	8	3	112	826	534	18.4	20	8.7	28.5	30	10.1	13	0	4	1	1
805	1852	8	3	112	827	534	18.4	20	8.7	28.5	30	10.1	13	0	4	1	1
806	1852	8	3	112	828	534	18.4	20	8.7	28.5	30	10.1	13	0	4	1	1
807	1852	8	3	112	829	534	18.4	20	8.7	28.5	30	10.1	13	0	4	1	1
808	1852	8	3	112	830	534	18.4	20	8.7	28.5	30	10.1	13	0	4	1	1
809	1852	8	3	112	831	534	18.4	20	8.7	28.5	30	10.1	13	0	4	1	1
810	1852	8	3	112	832	534	18.4	20	8.7	28.5	30	10.1	13	0	4	1	1
811	1852	8	3	112	833	534	18.4	20	8.7	28.5	30	10.1	13	0	4	1	1
812	1852	8	3	112	834	534	18.4	20	8.7	28.5	30	10.1	13	0	4	1	1
813	1852	8	3	112	835	534	18.4	20	8.7	28.5	30	10.1	13	1	4	1	1
814	1852	8	3	112	836	534	18.4	20	8.7	28.5	30	10.1	13	1	4	1	1
815	1852	8	3	112	837	534	18.4	20	8.7	28.5	30	10.1	13	1	4	1	1
816	1852	8	3	112	838	534	18.4	20	8.7	28.5	30	10.1	13	1	4	1	1
817	1852	8	3	112	839	534	18.4	20	8.7	28.5	30	10.1	13	1	4	1	1
818	1852	8	3	112	840	534	18.4	20	8.7	28.5	30	10.1	13	1	4	1	1
819	1852	8	3	112	841	534	18.4	20	8.7	28.5	30	10.1	13	1	4	1	1
820	1852	8	3	112	842	534	18.4	20	8.7	28.5	30	10.1	13	1	4	1	1
821	1852	8	3	112	843	534	18.4	20	8.7	28.5	30	10.1	13	1	4	1	1
822	1852	8	3	112	844	534	18.4	20	8.7	28.5	30	10.1	13	1	4	1	1
823	1852	8	3	112	845	534	18.4	20	8.7	28.5	30	10.1	13	1	4	1	1
824	1852	8	3	112	846	534	18.4	20	8.7	28.5	30	10.1	13	1	4	1	1
825	1852	8	3	112	847	534	18.4	20	8.7	28.5	30	10.1	13	1	4	1	1
826	1852	8	3	112	848	534	18.4	20	8.7	28.5	30	10.1	13	1	4	1	1
827	1852	8	3	112	849	534	18.4	20	8.7	28.5	30	10.1	13	1	4	1	1
828	1852	8	3	112	850	534	18.4	20	8.7	28.5	30	10.1	13	1	4	1	1
829	1852	8	3	112	851	534	18.4	20	8.7	28.5	30	10.1	13	1	4	1	1
830	1852	8	3	112	852	534	18.4	20	8.7	28.5	30	10.1	13	1	4	1	1
831	1852	8	3	112	853	534	18.4	20	8.7	28.5	30	10.1	13	1	4	1	1
832	1852	8	3	112	854	534	18.4	20	8.7	28.5	30	10.1	13	1	4	1	1
833	1852	8	3	112	855	534	18.4	20	8.7	28.5	30	10.1	13	1	4	1	1
834	1852	8	3	112	856	534	18.4	20	8.7	28.5	30	10.1	13	1	4	1	1
835	1852	8	3	112	857	534	18.4	20	8.7	28.5	30	10.1	13	0	6	1	1
836	1852	8	3	112	858	534	18.4	20	8.7	28.5	30	10.1	13	1	6	1	1
837	1852	8	3	112	859	534	18.4	20	8.7	28.5	30	10.1	13	1	6	1	1
838	1852	8	3	112	860	534	18.4	20	8.7	28.5	30	10.1	13	1	6	1	1
839	1852	8	3	112	861	534	18.4	20	8.7	28.5	30	10.1	13	0	6	1	1
840	1852	8	3	112	862	534	18.4	20	8.7	28.5	30	10.1	13	1	6	1	1
841	1852	8	3	112	863	534	18.4	20	8.7	28.5	30	10.1	13	0	6	1	1
842	1852	8	3	112	864	534	18.4	20	8.7	28.5	30	10.1	13	0	6	1	1
843	1852	8	3	112	865	534	18.4	20	8.7	28.5	30	10.1	13	1	6	1	1
844	1852	8	3	112	866	534	18.4	20	8.7	28.5	30	10.1	13	0	6	1	1
845	1852	8	3	112	867	534	18.4	20	8.7	28.5	30	10.1	13	0	6	1	1
846	1852	8	3	112	868	534	18.4	20	8.7	28.5	30	10.1	13	1	6	1	1
847	1852	8	3	112	869	534	18.4	20	8.7	28.5	30	10.1	13	0	6	1	1
848	1852	8	3	112	870	534	18.4	20	8.7	28.5	30	10.1	13	0	6	1	1
849	1852	8	3	112	871	534	18.4	20	8.7	28.5	30	10.1	13	1	6	1	1
850	1852	8	3	112	872	534	18.4	20	8.7	28.5	30	10.1	13	0	4	1	2
851	1852	8	3	112	873	534	18.4	20	8.7	28.5	30	10.1	13	1	4	1	2
852	1852	8	3	112	874	534	18.4	20	8.7	28.5	30	10.1	13	1	4	1	2
853	1852	8	3	112	875	534	18.4	20	8.7	28.5	30	10.1	13	1	3	1	2
854	1852	8	3	112	876	534	18.4	20	8.7	28.5	30	10.1	13	1	6	1	2
855	1852	8	3	112	877	534	18.4	20	8.7	28.5	30	10.1	13	1	3	2	2
856	1852	8	3	112	878	534	18.4	20	8.7	28.5	30	10.1	13	1	6	2	2
857	1852	8	3	112	879	534	18.4	20	8.7	28.5	30	10.1	13	1	6	2	2
858	1852	8	3	112	880	534	18.4	20	8.7	28.5	30	10.1	13	1	3	3	3
859	1852	8	3	112	881	534	18.4	20	8.7	28.5	30	10.1	13	0	4	3	3
860	1852	8	3	112	882	534	18.4	20	8.7	28.5	30	10.1	13	0	6	3	3
861	1852	8	3	112	883	534	18.4	20	8.7	28.5	30	10.1	13	1	6	3	3
862	1852	8	3	112	884	534	18.4	20	8.7	28.5	30	10.1	13	1	4	4	3
863	1852	8	3	112	885	534	18.4	20	8.7	28.5	30	10.1	13	0	3	5	3
864	1852	8	3	112	886	534	18.4	20	8.7	28.5	30	10.1	13	0	4	5	3
865	1852	8	3	112	887	534	18.4	20	8.7	28.5	30	10.1	13	0	4	5	3
866	1852	8	3	112	888	534	18.4	20	8.7	28.5	30	10.1	13	1	4	5	3
867	1852	8	3	112	889	534	18.4	20	8.7	28.5	30	10.1	13	0	6	5	3
868	1852	8	3	112	890	534	18.4	20	8.7	28.5	30	10.1	13	1	3	5	3
869	1852	8	3	112	891	534	18.4	20	8.7	28.5	30	10.1	13	0	3	5	3
870	1852	8	3	112	892	534	18.4	20	8.7	28.5	30	10.1	13	1	4	5	3
871	1852	8	3	112	893	534	18.4	20	8.7	28.5	30	10.1	13	1	4	5	3
872	1852	8	3	112	894	534	18.4	20	8.7	28.5	30	10.1	13	0	6	5	3
873	1852	8	3	112	895	534	18.4	20	8.7	28.5	30	10.1	13	0	4	5	3
874	1852	8	3	112	896	534	18.4	20	8.7	28.5	30	10.1	13	1	4	6	3
875	1852	8	3	112	897	534	18.4	20	8.7	28.5	30	10.1	13	0	6	6	3
876	1852	8	3	112	898	534	18.4	20	8.7	28.5	30	10.1	13	1	6	6	3
877	1852	8	3	112	899	534	18.4	20	8.7	28.5	30	10.1	13	0	3	6	3
878	1852	9	4	55	900	534	13.6	18.4	8.7	24	28.5	4.8	10.1	0	1	1	1
879	1852	9	4	55	901	534	13.6	18.4	8.7	24	28.5	4.8	10.1	1	1	1	1
880	1852	9	4	55	902	534	13.6	18.4	8.7	24	28.5	4.8	10.1	1	1	1	1
881	1852	9	4	55	903	534	13.6	18.4	8.7	24	28.5	4.8	10.1	0	1	1	1
882	1852	9	4	55	904	534	13.6	18.4	8.7	24	28.5	4.8	10.1	1	3	1	1
883	1852	9	4	55	905	534	13.6	18.4	8.7	24	28.5	4.8	10.1	1	3	1	1
884	1852	9	4	55	906	534	13.6	18.4	8.7	24	28.5	4.8	10.1	1	3	1	1
885	1852	9	4	55	907	534	13.6	18.4	8.7	24	28.5	4.8	10.1	1	3	1	1
886	1852	9	4	55	908	534	13.6	18.4	8.7	24	28.5	4.8	10.1	1	3	1	1
887	1852	9	4	55	909	534	13.6	18.4	8.7	24	28.5	4.8	10.1	1	3	1	1
888	1852	9	4	55	910	534	13.6	18.4	8.7	24	28.5	4.8	10.1	0	3	1	1
889	1852	9	4	55	911	534	13.6	18.4	8.7	24	28.5	4.8	10.1	0	3	1	1
890	1852	9	4	55	912	534	13.6	18.4	8.7	24	28.5	4.8	10.1	0	3	1	1
891	1852	9	4	55	913	534	13.6	18.4	8.7	24	28.5	4.8	10.1	0	3	1	1
892	1852	9	4	55	914	534	13.6	18.4	8.7	24	28.5	4.8	10.1	0	3	1	1
893	1852	9	4	55	915	534	13.6	18.4	8.7	24	28.5	4.8	10.1	0	3	1	1
894	1852	9	4	55	916	534	13.6	18.4	8.7	24	28.5	4.8	10.1	1	3	1	1
895	1852	9	4	55	917	534	13.6	18.4	8.7	24	28.5	4.8	10.1	1	3	1	1
896	1852	9	4	55	918	534	13.6	18.4	8.7	24	28.5	4.8	10.1	0	3	1	1
897	1852	9	4	55	919	534	13.6	18.4	8.7	24	28.5	4.8	10.1	0	3	1	1
898	1852	9	4	55	920	534	13.6	18.4	8.7	24	28.5	4.8	10.1	1	3	1	1
899	1852	9	4	55	921	534	13.6	18.4	8.7	24	28.5	4.8	10.1	0	3	1	1
900	1852	9	4	55	922	534	13.6	18.4	8.7	24	28.5	4.8	10.1	0	3	1	1
901	1852	9	4	55	923	534	13.6	18.4	8.7	24	28.5	4.8	10.1	0	3	1	1
902	1852	9	4	55	924	534	13.6	18.4	8.7	24	28.5	4.8	10.1	0	3	1	1
903	1852	9	4	55	925	534	13.6	18.4	8.7	24	28.5	4.8	10.1	1	3	1	1
904	1852	9	4	55	926	534	13.6	18.4	8.7	24	28.5	4.8	10.1	0	3	1	1
905	1852	9	4	55	927	534	13.6	18.4	8.7	24	28.5	4.8	10.1	1	3	1	1
906	1852	9	4	55	928	534	13.6	18.4	8.7	24	28.5	4.8	10.1	1	3	1	1
907	1852	9	4	55	929	534	13.6	18.4	8.7	24	28.5	4.8	10.1	0	3	1	1
908	1852	9	4	55	930	534	13.6	18.4	8.7	24	28.5	4.8	10.1	1	3	1	1
909	1852	9	4	55	931	534	13.6	18.4	8.7	24	28.5	4.8	10.1	1	3	1	1
910	1852	9	4	55	932	534	13.6	18.4	8.7	24	28.5	4.8	10.1	1	3	1	1
911	1852	9	4	55	933	534	13.6	18.4	8.7	24	28.5	4.8	10.1	1	3	1	1
912	1852	9	4	55	934	534	13.6	18.4	8.7	24	28.5	4.8	10.1	1	3	1	1
913	1852	9	4	55	935	534	13.6	18.4	8.7	24	28.5	4.8	10.1	0	3	1	1
914	1852	9	4	55	936	534	13.6	18.4	8.7	24	28.5	4.8	10.1	1	3	1	1
915	1852	9	4	55	937	534	13.6	18.4	8.7	24	28.5	4.8	10.1	0	3	1	1
916	1852	9	4	55	938	534	13.6	18.4	8.7	24	28.5	4.8	10.1	1	3	1	1
917	1852	9	4	55	939	534	13.6	18.4	8.7	24	28.5	4.8	10.1	1	3	1	1
918	1852	9	4	55	940	534	13.6	18.4	8.7	24	28.5	4.8	10.1	0	3	1	1
919	1852	9	4	55	941	534	13.6	18.4	8.7	24	28.5	4.8	10.1	0	3	1	1
920	1852	9	4	55	942	534	13.6	18.4	8.7	24	28.5	4.8	10.1	0	3	1	1
921	1852	9	4	55	943	534	13.6	18.4	8.7	24	28.5	4.8	10.1	1	3	1	1
922	1852	9	4	55	944	534	13.6	18.4	8.7	24	28.5	4.8	10.1	1	3	1	1
923	1852	9	4	55	945	534	13.6	18.4	8.7	24	28.5	4.8	10.1	1	3	1	1
924	1852	9	4	55	946	534	13.6	18.4	8.7	24	28.5	4.8	10.1	0	3	1	1
925	1852	9	4	55	947	534	13.6	18.4	8.7	24	28.5	4.8	10.1	1	3	1	1
926	1852	9	4	55	948	534	13.6	18.4	8.7	24	28.5	4.8	10.1	1	3	1	1
927	1852	9	4	55	949	534	13.6	18.4	8.7	24	28.5	4.8	10.1	0	3	1	1
928	1852	9	4	55	950	534	13.6	18.4	8.7	24	28.5	4.8	10.1	1	3	1	1
929	1852	9	4	55	951	534	13.6	18.4	8.7	24	28.5	4.8	10.1	1	3	1	1
930	1852	9	4	55	952	534	13.6	18.4	8.7	24	28.5	4.8	10.1	1	3	1	1
931	1852	9	4	55	953	534	13.6	18.4	8.7	24	28.5	4.8	10.1	0	3	1	1
932	1852	9	4	55	954	534	13.6	18.4	8.7	24	28.5	4.8	10.1	0	3	1	1
933	1852	9	4	55	955	534	13.6	18.4	8.7	24	28.5	4.8	10.1	0	3	1	1
934	1852	9	4	55	956	534	13.6	18.4	8.7	24	28.5	4.8	10.1	0	3	1	1
935	1852	9	4	55	957	534	13.6	18.4	8.7	24	28.5	4.8	10.1	1	3	1	1
936	1852	9	4	55	958	534	13.6	18.4	8.7	24	28.5	4.8	10.1	1	3	1	1
937	1852	9	4	55	959	534	13.6	18.4	8.7	24	28.5	4.8	10.1	0	3	1	1
938	1852	9	4	55	960	534	13.6	18.4	8.7	24	28.5	4.8	10.1	1	3	1	1
939	1852	9	4	55	961	534	13.6	18.4	8.7	24	28.5	4.8	10.1	0	3	1	1
940	1852	9	4	55	962	534	13.6	18.4	8.7	24	28.5	4.8	10.1	0	3	1	1
941	1852	9	4	55	963	534	13.6	18.4	8.7	24	28.5	4.8	10.1	1	3	1	1
942	1852	9	4	55	964	534	13.6	18.4	8.7	24	28.5	4.8	10.1	1	3	1	1
943	1852	9	4	55	965	534	13.6	18.4	8.7	24	28.5	4.8	10.1	1	3	1	1
944	1852	9	4	55	966	534	13.6	18.4	8.7	24	28.5	4.8	10.1	1	3	1	1
945	1852	9	4	55	967	534	13.6	18.4	8.7	24	28.5	4.8	10.1	0	3	1	1
946	1852	9	4	55	968	534	13.6	18.4	8.7	24	28.5	4.8	10.1	1	3	1	1
947	1852	9	4	55	969	534	13.6	18.4	8.7	24	28.5	4.8	10.1	0	3	1	1
948	1852	9	4	55	970	534	13.6	18.4	8.7	24	28.5	4.8	10.1	0	3	1	1
949	1852	9	4	55	971	534	13.6	18.4	8.7	24	28.5	4.8	10.1	0	3	1	1
950	1852	9	4	55	972	534	13.6	18.4	8.7	24	28.5	4.8	10.1	1	3	1	1
951	1852	9	4	55	973	534	13.6	18.4	8.7	24	28.5	4.8	10.1	1	1	1	1
952	1852	9	4	55	974	534	13.6	18.4	8.7	24	28.5	4.8	10.1	1	1	1	1
953	1852	9	4	55	975	534	13.6	18.4	8.7	24	28.5	4.8	10.1	1	1	1	1
954	1852	9	4	55	976	534	13.6	18.4	8.7	24	28.5	4.8	10.1	1	1	1	1
955	1852	9	4	55	977	534	13.6	18.4	8.7	24	28.5	4.8	10.1	1	1	1	1
956	1852	9	4	55	978	534	13.6	18.4	8.7	24	28.5	4.8	10.1	1	3	1	1
957	1852	9	4	55	979	534	13.6	18.4	8.7	24	28.5	4.8	10.1	0	3	1	1
958	1852	9	4	55	980	534	13.6	18.4	8.7	24	28.5	4.8	10.1	0	4	1	1
959	1852	9	4	55	981	534	13.6	18.4	8.7	24	28.5	4.8	10.1	1	4	1	1
960	1852	9	4	55	982	534	13.6	18.4	8.7	24	28.5	4.8	10.1	0	4	1	1
961	1852	9	4	55	983	534	13.6	18.4	8.7	24	28.5	4.8	10.1	1	4	1	1
962	1852	9	4	55	984	534	13.6	18.4	8.7	24	28.5	4.8	10.1	0	4	1	1
963	1852	9	4	55	985	534	13.6	18.4	8.7	24	28.5	4.8	10.1	0	4	1	1
964	1852	9	4	55	986	534	13.6	18.4	8.7	24	28.5	4.8	10.1	1	4	1	1
965	1852	9	4	55	987	534	13.6	18.4	8.7	24	28.5	4.8	10.1	1	4	1	1
966	1852	9	4	55	988	534	13.6	18.4	8.7	24	28.5	4.8	10.1	1	4	1	1
967	1852	9	4	55	989	534	13.6	18.4	8.7	24	28.5	4.8	10.1	0	4	1	1
968	1852	9	4	55	990	534	13.6	18.4	8.7	24	28.5	4.8	10.1	0	4	1	1
969	1852	9	4	55	991	534	13.6	18.4	8.7	24	28.5	4.8	10.1	1	4	1	1
970	1852	9	4	55	992	534	13.6	18.4	8.7	24	28.5	4.8	10.1	1	4	1	1
971	1852	9	4	55	993	534	13.6	18.4	8.7	24	28.5	4.8	10.1	1	4	1	1
972	1852	9	4	55	994	534	13.6	18.4	8.7	24	28.5	4.8	10.1	0	4	1	1
973	1852	9	4	55	995	534	13.6	18.4	8.7	24	28.5	4.8	10.1	0	4	1	1
974	1852	9	4	55	996	534	13.6	18.4	8.7	24	28.5	4.8	10.1	0	4	1	1
975	1852	9	4	55	997	534	13.6	18.4	8.7	24	28.5	4.8	10.1	0	4	1	1
976	1852	9	4	55	998	534	13.6	18.4	8.7	24	28.5	4.8	10.1	0	4	1	1
977	1852	9	4	55	999	534	13.6	18.4	8.7	24	28.5	4.8	10.1	0	4	1	1
978	1852	9	4	55	1000	534	13.6	18.4	8.7	24	28.5	4.8	10.1	0	4	1	1
979	1852	9	4	55	1001	534	13.6	18.4	8.7	24	28.5	4.8	10.1	0	4	1	1
980	1852	9	4	55	1002	534	13.6	18.4	8.7	24	28.5	4.8	10.1	0	4	1	1
981	1852	9	4	55	1003	534	13.6	18.4	8.7	24	28.5	4.8	10.1	0	4	1	1
982	1852	9	4	55	1004	534	13.6	18.4	8.7	24	28.5	4.8	10.1	0	4	1	1
983	1852	9	4	55	1005	534	13.6	18.4	8.7	24	28.5	4.8	10.1	0	4	1	1
984	1852	9	4	55	1006	534	13.6	18.4	8.7	24	28.5	4.8	10.1	0	4	1	1
985	1852	9	4	55	1007	534	13.6	18.4	8.7	24	28.5	4.8	10.1	0	4	1	1
986	1852	9	4	55	1008	534	13.6	18.4	8.7	24	28.5	4.8	10.1	0	4	1	1
987	1852	9	4	55	1009	534	13.6	18.4	8.7	24	28.5	4.8	10.1	1	4	1	1
988	1852	9	4	55	1010	534	13.6	18.4	8.7	24	28.5	4.8	10.1	1	4	1	1
989	1852	9	4	55	1011	534	13.6	18.4	8.7	24	28.5	4.8	10.1	1	4	1	1
990	1852	9	4	55	1012	534	13.6	18.4	8.7	24	28.5	4.8	10.1	1	4	1	1
991	1852	9	4	55	1013	534	13.6	18.4	8.7	24	28.5	4.8	10.1	1	4	1	1
992	1852	9	4	55	1014	534	13.6	18.4	8.7	24	28.5	4.8	10.1	1	4	1	1
993	1852	9	4	55	1015	534	13.6	18.4	8.7	24	28.5	4.8	10.1	1	4	1	1
994	1852	9	4	55	1016	534	13.6	18.4	8.7	24	28.5	4.8	10.1	1	4	1	1
995	1852	9	4	55	1017	534	13.6	18.4	8.7	24	28.5	4.8	10.1	1	4	1	1
996	1852	9	4	55	1018	534	13.6	18.4	8.7	24	28.5	4.8	10.1	1	4	1	1
997	1852	9	4	55	1019	534	13.6	18.4	8.7	24	28.5	4.8	10.1	1	4	1	1
998	1852	9	4	55	1020	534	13.6	18.4	8.7	24	28.5	4.8	10.1	1	4	1	1
999	1852	9	4	55	1021	534	13.6	18.4	8.7	24	28.5	4.8	10.1	1	4	1	1
1000	1852	9	4	55	1022	534	13.6	18.4	8.7	24	28.5	4.8	10.1	1	4	1	1
1001	1852	9	4	55	1023	534	13.6	18.4	8.7	24	28.5	4.8	10.1	1	4	1	1
1002	1852	9	4	55	1024	534	13.6	18.4	8.7	24	28.5	4.8	10.1	1	4	1	1
1003	1852	9	4	55	1025	534	13.6	18.4	8.7	24	28.5	4.8	10.1	1	4	1	1
1004	1852	9	4	55	1026	534	13.6	18.4	8.7	24	28.5	4.8	10.1	1	4	1	1
1005	1852	9	4	55	1027	534	13.6	18.4	8.7	24	28.5	4.8	10.1	1	4	1	1
1006	1852	9	4	55	1028	534	13.6	18.4	8.7	24	28.5	4.8	10.1	1	4	1	1
1007	1852	9	4	55	1029	534	13.6	18.4	8.7	24	28.5	4.8	10.1	1	4	1	1
1008	1852	9	4	55	1030	534	13.6	18.4	8.7	24	28.5	4.8	10.1	1	4	1	1
1009	1852	9	4	55	1031	534	13.6	18.4	8.7	24	28.5	4.8	10.1	1	4	1	1
1010	1852	9	4	55	1032	534	13.6	18.4	8.7	24	28.5	4.8	10.1	1	4	1	1
1011	1852	9	4	55	1033	534	13.6	18.4	8.7	24	28.5	4.8	10.1	1	4	1	1
1012	1852	9	4	55	1034	534	13.6	18.4	8.7	24	28.5	4.8	10.1	1	4	1	1
1013	1852	9	4	55	1035	534	13.6	18.4	8.7	24	28.5	4.8	10.1	1	4	1	1
1014	1852	9	4	55	1036	534	13.6	18.4	8.7	24	28.5	4.8	10.1	1	4	1	1
1015	1852	9	4	55	1037	534	13.6	18.4	8.7	24	28.5	4.8	10.1	1	4	1	1
1016	1852	9	4	55	1038	534	13.6	18.4	8.7	24	28.5	4.8	10.1	0	4	1	1
1017	1852	9	4	55	1039	534	13.6	18.4	8.7	24	28.5	4.8	10.1	0	4	1	1
1018	1852	9	4	55	1040	534	13.6	18.4	8.7	24	28.5	4.8	10.1	1	4	1	1
1019	1852	9	4	55	1041	534	13.6	18.4	8.7	24	28.5	4.8	10.1	1	5	1	1
1020	1852	9	4	55	1042	534	13.6	18.4	8.7	24	28.5	4.8	10.1	1	6	1	1
1021	1852	9	4	55	1043	534	13.6	18.4	8.7	24	28.5	4.8	10.1	1	6	1	1
1022	1852	9	4	55	1044	534	13.6	18.4	8.7	24	28.5	4.8	10.1	1	6	1	1
1023	1852	9	4	55	1045	534	13.6	18.4	8.7	24	28.5	4.8	10.1	1	6	1	1
1024	1852	9	4	55	1046	534	13.6	18.4	8.7	24	28.5	4.8	10.1	1	6	1	1
1025	1852	9	4	55	1047	534	13.6	18.4	8.7	24	28.5	4.8	10.1	1	6	1	1
1026	1852	9	4	55	1048	534	13.6	18.4	8.7	24	28.5	4.8	10.1	1	6	1	1
1027	1852	9	4	55	1049	534	13.6	18.4	8.7	24	28.5	4.8	10.1	1	6	1	1
1028	1852	9	4	55	1050	534	13.6	18.4	8.7	24	28.5	4.8	10.1	1	6	1	1
1029	1852	9	4	55	1051	534	13.6	18.4	8.7	24	28.5	4.8	10.1	1	6	1	1
1030	1852	9	4	55	1052	534	13.6	18.4	8.7	24	28.5	4.8	10.1	0	6	1	1
1031	1852	9	4	55	1053	534	13.6	18.4	8.7	24	28.5	4.8	10.1	0	6	1	1
1032	1852	9	4	55	1054	534	13.6	18.4	8.7	24	28.5	4.8	10.1	0	6	1	1
1033	1852	9	4	55	1055	534	13.6	18.4	8.7	24	28.5	4.8	10.1	1	6	1	1
1034	1852	9	4	55	1056	534	13.6	18.4	8.7	24	28.5	4.8	10.1	1	6	1	1
1035	1852	9	4	55	1057	534	13.6	18.4	8.7	24	28.5	4.8	10.1	0	6	1	1
1036	1852	9	4	55	1058	534	13.6	18.4	8.7	24	28.5	4.8	10.1	0	6	1	1
1037	1852	9	4	55	1059	534	13.6	18.4	8.7	24	28.5	4.8	10.1	0	6	1	1
1038	1852	9	4	55	1060	534	13.6	18.4	8.7	24	28.5	4.8	10.1	1	6	1	1
1039	1852	9	4	55	1061	534	13.6	18.4	8.7	24	28.5	4.8	10.1	1	6	1	1
1040	1852	9	4	55	1062	534	13.6	18.4	8.7	24	28.5	4.8	10.1	1	6	1	1
1041	1852	9	4	55	1063	534	13.6	18.4	8.7	24	28.5	4.8	10.1	0	6	1	1
1042	1852	9	4	55	1064	534	13.6	18.4	8.7	24	28.5	4.8	10.1	1	6	1	1
1043	1852	9	4	55	1065	534	13.6	18.4	8.7	24	28.5	4.8	10.1	1	6	1	1
1044	1852	9	4	55	1066	534	13.6	18.4	8.7	24	28.5	4.8	10.1	0	6	1	1
1045	1852	9	4	55	1067	534	13.6	18.4	8.7	24	28.5	4.8	10.1	1	6	1	1
1046	1852	9	4	55	1068	534	13.6	18.4	8.7	24	28.5	4.8	10.1	0	6	1	1
1047	1852	9	4	55	1069	534	13.6	18.4	8.7	24	28.5	4.8	10.1	0	6	1	1
1048	1852	9	4	55	1070	534	13.6	18.4	8.7	24	28.5	4.8	10.1	0	6	1	1
1049	1852	9	4	55	1071	534	13.6	18.4	8.7	24	28.5	4.8	10.1	1	6	1	1
1050	1852	9	4	55	1072	534	13.6	18.4	8.7	24	28.5	4.8	10.1	0	6	1	1
1051	1852	9	4	55	1073	534	13.6	18.4	8.7	24	28.5	4.8	10.1	0	6	1	1
1052	1852	9	4	55	1074	534	13.6	18.4	8.7	24	28.5	4.8	10.1	0	6	1	1
1053	1852	9	4	55	1075	534	13.6	18.4	8.7	24	28.5	4.8	10.1	1	6	1	1
1054	1852	9	4	55	1076	534	13.6	18.4	8.7	24	28.5	4.8	10.1	1	6	1	1
1055	1852	9	4	55	1077	534	13.6	18.4	8.7	24	28.5	4.8	10.1	0	6	1	1
1056	1852	9	4	55	1078	534	13.6	18.4	8.7	24	28.5	4.8	10.1	0	6	1	1
1057	1852	9	4	55	1079	534	13.6	18.4	8.7	24	28.5	4.8	10.1	0	6	1	1
1058	1852	9	4	55	1080	534	13.6	18.4	8.7	24	28.5	4.8	10.1	0	6	1	1
1059	1852	9	4	55	1081	534	13.6	18.4	8.7	24	28.5	4.8	10.1	0	6	1	1
1060	1852	9	4	55	1082	534	13.6	18.4	8.7	24	28.5	4.8	10.1	0	6	1	1
1061	1852	9	4	55	1083	534	13.6	18.4	8.7	24	28.5	4.8	10.1	0	6	1	1
1062	1852	9	4	55	1084	534	13.6	18.4	8.7	24	28.5	4.8	10.1	0	6	1	1
1063	1852	9	4	55	1085	534	13.6	18.4	8.7	24	28.5	4.8	10.1	0	6	1	1
1064	1852	9	4	55	1086	534	13.6	18.4	8.7	24	28.5	4.8	10.1	0	6	1	1
1065	1852	9	4	55	1087	534	13.6	18.4	8.7	24	28.5	4.8	10.1	0	6	1	1
1066	1852	9	4	55	1088	534	13.6	18.4	8.7	24	28.5	4.8	10.1	0	3	1	1
1067	1852	9	4	55	1089	534	13.6	18.4	8.7	24	28.5	4.8	10.1	1	3	1	1
1068	1852	9	4	55	1090	534	13.6	18.4	8.7	24	28.5	4.8	10.1	0	3	1	1
1069	1852	9	4	55	1091	534	13.6	18.4	8.7	24	28.5	4.8	10.1	0	5	1	1
1070	1852	9	4	55	1092	534	13.6	18.4	8.7	24	28.5	4.8	10.1	1	4	1	2
1071	1852	9	4	55	1093	534	13.6	18.4	8.7	24	28.5	4.8	10.1	1	4	1	2
1072	1852	9	4	55	1094	534	13.6	18.4	8.7	24	28.5	4.8	10.1	1	3	2	2
1073	1852	9	4	55	1095	534	13.6	18.4	8.7	24	28.5	4.8	10.1	1	3	2	2
1074	1852	9	4	55	1096	534	13.6	18.4	8.7	24	28.5	4.8	10.1	0	4	2	2
1075	1852	9	4	55	1097	534	13.6	18.4	8.7	24	28.5	4.8	10.1	1	4	2	2
1076	1852	9	4	55	1098	534	13.6	18.4	8.7	24	28.5	4.8	10.1	0	4	3	3
1077	1852	9	4	55	1099	534	13.6	18.4	8.7	24	28.5	4.8	10.1	1	3	3	3
1078	1852	9	4	55	1100	534	13.6	18.4	8.7	24	28.5	4.8	10.1	0	4	4	3
1079	1852	9	4	55	1101	534	13.6	18.4	8.7	24	28.5	4.8	10.1	0	6	5	3
1080	1852	9	4	55	1102	534	13.6	18.4	8.7	24	28.5	4.8	10.1	0	4	5	3
1081	1852	9	4	55	1103	534	13.6	18.4	8.7	24	28.5	4.8	10.1	1	4	5	3
1082	1852	10	4	38	1104	534	7.7	13.6	8.7	21.3	24	-3.8	4.8	0	1	1	1
1083	1852	10	4	38	1105	534	7.7	13.6	8.7	21.3	24	-3.8	4.8	1	3	1	1
1084	1852	10	4	38	1106	534	7.7	13.6	8.7	21.3	24	-3.8	4.8	1	3	1	1
1085	1852	10	4	38	1107	534	7.7	13.6	8.7	21.3	24	-3.8	4.8	1	3	1	1
1086	1852	10	4	38	1108	534	7.7	13.6	8.7	21.3	24	-3.8	4.8	0	1	1	1
1087	1852	10	4	38	1109	534	7.7	13.6	8.7	21.3	24	-3.8	4.8	0	4	1	1
1088	1852	10	4	38	1110	534	7.7	13.6	8.7	21.3	24	-3.8	4.8	0	6	1	1
1089	1852	10	4	38	1111	534	7.7	13.6	8.7	21.3	24	-3.8	4.8	0	4	1	2
1090	1852	10	4	38	1112	534	7.7	13.6	8.7	21.3	24	-3.8	4.8	0	3	1	2
1091	1852	10	4	38	1113	534	7.7	13.6	8.7	21.3	24	-3.8	4.8	1	1	1	2
1092	1852	10	4	38	1114	534	7.7	13.6	8.7	21.3	24	-3.8	4.8	1	3	1	2
1093	1852	10	4	38	1115	534	7.7	13.6	8.7	21.3	24	-3.8	4.8	0	4	2	2
1094	1852	10	4	38	1116	534	7.7	13.6	8.7	21.3	24	-3.8	4.8	1	3	2	2
1095	1852	10	4	38	1117	534	7.7	13.6	8.7	21.3	24	-3.8	4.8	0	3	2	2
1096	1852	10	4	38	1118	534	7.7	13.6	8.7	21.3	24	-3.8	4.8	0	4	3	3
1097	1852	10	4	38	1119	534	7.7	13.6	8.7	21.3	24	-3.8	4.8	0	6	3	3
1098	1852	10	4	38	1120	534	7.7	13.6	8.7	21.3	24	-3.8	4.8	1	4	3	3
1099	1852	10	4	38	1121	534	7.7	13.6	8.7	21.3	24	-3.8	4.8	1	3	4	3
1100	1852	10	4	38	1122	534	7.7	13.6	8.7	21.3	24	-3.8	4.8	0	3	4	3
1101	1852	10	4	38	1123	534	7.7	13.6	8.7	21.3	24	-3.8	4.8	1	5	5	3
1102	1852	10	4	38	1124	534	7.7	13.6	8.7	21.3	24	-3.8	4.8	0	3	5	3
1103	1852	10	4	38	1125	534	7.7	13.6	8.7	21.3	24	-3.8	4.8	0	1	5	3
1104	1852	10	4	38	1126	534	7.7	13.6	8.7	21.3	24	-3.8	4.8	1	3	5	3
1105	1852	10	4	38	1127	534	7.7	13.6	8.7	21.3	24	-3.8	4.8	0	6	5	3
1106	1852	10	4	38	1128	534	7.7	13.6	8.7	21.3	24	-3.8	4.8	1	4	5	3
1107	1852	10	4	38	1129	534	7.7	13.6	8.7	21.3	24	-3.8	4.8	0	4	6	3
1108	1852	11	4	41	1130	534	4.3	7.7	8.7	13.1	21.3	-11	-3.8	1	3	1	2
1109	1852	11	4	41	1131	534	4.3	7.7	8.7	13.1	21.3	-11	-3.8	1	3	2	2
1110	1852	11	4	41	1132	534	4.3	7.7	8.7	13.1	21.3	-11	-3.8	1	1	2	2
1111	1852	11	4	41	1133	534	4.3	7.7	8.7	13.1	21.3	-11	-3.8	1	3	2	2
1112	1852	11	4	41	1134	534	4.3	7.7	8.7	13.1	21.3	-11	-3.8	0	3	2	2
1113	1852	11	4	41	1135	534	4.3	7.7	8.7	13.1	21.3	-11	-3.8	1	4	2	2
1114	1852	11	4	41	1136	534	4.3	7.7	8.7	13.1	21.3	-11	-3.8	1	4	2	2
1115	1852	11	4	41	1137	534	4.3	7.7	8.7	13.1	21.3	-11	-3.8	1	6	2	2
1116	1852	11	4	41	1138	534	4.3	7.7	8.7	13.1	21.3	-11	-3.8	1	6	2	2
1117	1852	11	4	41	1139	534	4.3	7.7	8.7	13.1	21.3	-11	-3.8	1	1	3	3
1118	1852	11	4	41	1140	534	4.3	7.7	8.7	13.1	21.3	-11	-3.8	1	3	3	3
1119	1852	11	4	41	1141	534	4.3	7.7	8.7	13.1	21.3	-11	-3.8	0	3	4	3
1120	1852	11	4	41	1142	534	4.3	7.7	8.7	13.1	21.3	-11	-3.8	1	1	4	3
1121	1852	11	4	41	1143	534	4.3	7.7	8.7	13.1	21.3	-11	-3.8	1	3	5	3
1122	1852	11	4	41	1144	534	4.3	7.7	8.7	13.1	21.3	-11	-3.8	1	3	5	3
1123	1852	11	4	41	1145	534	4.3	7.7	8.7	13.1	21.3	-11	-3.8	1	3	5	3
1124	1852	11	4	41	1146	534	4.3	7.7	8.7	13.1	21.3	-11	-3.8	1	3	5	3
1125	1852	11	4	41	1147	534	4.3	7.7	8.7	13.1	21.3	-11	-3.8	0	4	5	3
1126	1852	11	4	41	1148	534	4.3	7.7	8.7	13.1	21.3	-11	-3.8	0	1	5	3
1127	1852	11	4	41	1149	534	4.3	7.7	8.7	13.1	21.3	-11	-3.8	0	4	5	3
1128	1852	11	4	41	1150	534	4.3	7.7	8.7	13.1	21.3	-11	-3.8	0	3	5	3
1129	1852	11	4	41	1151	534	4.3	7.7	8.7	13.1	21.3	-11	-3.8	1	3	6	3
1130	1852	11	4	41	1152	534	4.3	7.7	8.7	13.1	21.3	-11	-3.8	0	3	6	3
1131	1852	11	4	41	1153	534	4.3	7.7	8.7	13.1	21.3	-11	-3.8	1	3	6	3
1132	1852	11	4	41	1154	534	4.3	7.7	8.7	13.1	21.3	-11	-3.8	0	6	6	3
1133	1852	11	4	41	1155	534	4.3	7.7	8.7	13.1	21.3	-11	-3.8	0	6	3	3
1134	1852	12	1	38	1156	534	3.5	4.3	8.7	9.3	13.1	-7.1	-11	0	3	1	1
1135	1852	12	1	38	1157	534	3.5	4.3	8.7	9.3	13.1	-7.1	-11	0	5	1	2
1136	1852	12	1	38	1158	534	3.5	4.3	8.7	9.3	13.1	-7.1	-11	0	4	1	2
1137	1852	12	1	38	1159	534	3.5	4.3	8.7	9.3	13.1	-7.1	-11	0	4	1	2
1138	1852	12	1	38	1160	534	3.5	4.3	8.7	9.3	13.1	-7.1	-11	0	4	1	2
1139	1852	12	1	38	1161	534	3.5	4.3	8.7	9.3	13.1	-7.1	-11	0	1	1	2
1140	1852	12	1	38	1162	534	3.5	4.3	8.7	9.3	13.1	-7.1	-11	0	3	2	2
1141	1852	12	1	38	1163	534	3.5	4.3	8.7	9.3	13.1	-7.1	-11	1	3	2	2
1142	1852	12	1	38	1164	534	3.5	4.3	8.7	9.3	13.1	-7.1	-11	0	4	2	2
1143	1852	12	1	38	1165	534	3.5	4.3	8.7	9.3	13.1	-7.1	-11	0	4	2	2
1144	1852	12	1	38	1166	534	3.5	4.3	8.7	9.3	13.1	-7.1	-11	0	4	2	2
1145	1852	12	1	38	1167	534	3.5	4.3	8.7	9.3	13.1	-7.1	-11	0	6	3	3
1146	1852	12	1	38	1168	534	3.5	4.3	8.7	9.3	13.1	-7.1	-11	0	3	3	3
1147	1852	12	1	38	1169	534	3.5	4.3	8.7	9.3	13.1	-7.1	-11	1	6	4	3
1148	1852	12	1	38	1170	534	3.5	4.3	8.7	9.3	13.1	-7.1	-11	1	3	4	3
1149	1852	12	1	38	1171	534	3.5	4.3	8.7	9.3	13.1	-7.1	-11	0	3	4	3
1150	1852	12	1	38	1172	534	3.5	4.3	8.7	9.3	13.1	-7.1	-11	1	3	4	3
1151	1852	12	1	38	1173	534	3.5	4.3	8.7	9.3	13.1	-7.1	-11	1	6	5	3
1152	1852	12	1	38	1174	534	3.5	4.3	8.7	9.3	13.1	-7.1	-11	1	6	5	3
1153	1852	12	1	38	1175	534	3.5	4.3	8.7	9.3	13.1	-7.1	-11	0	6	5	3
1154	1852	12	1	38	1176	534	3.5	4.3	8.7	9.3	13.1	-7.1	-11	1	6	5	3
1155	1852	12	1	38	1177	534	3.5	4.3	8.7	9.3	13.1	-7.1	-11	0	4	5	3
1156	1852	12	1	38	1178	534	3.5	4.3	8.7	9.3	13.1	-7.1	-11	1	4	5	3
1157	1852	12	1	38	1179	534	3.5	4.3	8.7	9.3	13.1	-7.1	-11	1	3	6	3
1158	1853	1	1	26	1180	557	0.6	3.5	6.9	6.8	9.3	-7.1	-7.1	0	3	1	2
1159	1853	1	1	26	1181	557	0.6	3.5	6.9	6.8	9.3	-7.1	-7.1	1	3	1	2
1160	1853	1	1	26	1182	557	0.6	3.5	6.9	6.8	9.3	-7.1	-7.1	0	1	2	2
1161	1853	1	1	26	1183	557	0.6	3.5	6.9	6.8	9.3	-7.1	-7.1	0	6	3	3
1162	1853	1	1	26	1184	557	0.6	3.5	6.9	6.8	9.3	-7.1	-7.1	1	3	3	3
1163	1853	1	1	26	1185	557	0.6	3.5	6.9	6.8	9.3	-7.1	-7.1	1	3	3	3
1164	1853	1	1	26	1186	557	0.6	3.5	6.9	6.8	9.3	-7.1	-7.1	0	6	3	3
1165	1853	1	1	26	1187	557	0.6	3.5	6.9	6.8	9.3	-7.1	-7.1	1	4	3	3
1166	1853	1	1	26	1188	557	0.6	3.5	6.9	6.8	9.3	-7.1	-7.1	0	3	4	3
1167	1853	1	1	26	1189	557	0.6	3.5	6.9	6.8	9.3	-7.1	-7.1	0	3	4	3
1168	1853	1	1	26	1190	557	0.6	3.5	6.9	6.8	9.3	-7.1	-7.1	1	3	4	3
1169	1853	1	1	26	1191	557	0.6	3.5	6.9	6.8	9.3	-7.1	-7.1	0	3	4	3
1170	1853	1	1	26	1192	557	0.6	3.5	6.9	6.8	9.3	-7.1	-7.1	0	4	4	3
1171	1853	1	1	26	1193	557	0.6	3.5	6.9	6.8	9.3	-7.1	-7.1	1	6	4	3
1172	1853	1	1	26	1194	557	0.6	3.5	6.9	6.8	9.3	-7.1	-7.1	0	4	4	3
1173	1853	1	1	26	1195	557	0.6	3.5	6.9	6.8	9.3	-7.1	-7.1	0	4	5	3
1174	1853	1	1	26	1196	557	0.6	3.5	6.9	6.8	9.3	-7.1	-7.1	1	3	5	3
1175	1853	1	1	26	1197	557	0.6	3.5	6.9	6.8	9.3	-7.1	-7.1	1	3	5	3
1176	1853	1	1	26	1198	557	0.6	3.5	6.9	6.8	9.3	-7.1	-7.1	0	4	5	3
1177	1853	1	1	26	1199	557	0.6	3.5	6.9	6.8	9.3	-7.1	-7.1	0	3	5	3
1178	1853	1	1	26	1200	557	0.6	3.5	6.9	6.8	9.3	-7.1	-7.1	0	3	5	3
1179	1853	1	1	26	1201	557	0.6	3.5	6.9	6.8	9.3	-7.1	-7.1	1	6	5	3
1180	1853	1	1	26	1202	557	0.6	3.5	6.9	6.8	9.3	-7.1	-7.1	0	6	5	3
1181	1853	1	1	26	1203	557	0.6	3.5	6.9	6.8	9.3	-7.1	-7.1	1	6	5	3
1182	1853	1	1	26	1204	557	0.6	3.5	6.9	6.8	9.3	-7.1	-7.1	1	1	5	3
1183	1853	1	1	26	1205	557	0.6	3.5	6.9	6.8	9.3	-7.1	-7.1	0	3	5	3
1184	1853	1	1	26	1206	557	0.6	3.5	6.9	6.8	9.3	-7.1	-7.1	0	6	5	3
1185	1853	1	1	26	1207	557	0.6	3.5	6.9	6.8	9.3	-7.1	-7.1	1	3	5	3
1186	1853	1	1	26	1208	557	0.6	3.5	6.9	6.8	9.3	-7.1	-7.1	1	6	5	3
1187	1853	1	1	26	1209	557	0.6	3.5	6.9	6.8	9.3	-7.1	-7.1	1	3	6	3
1188	1853	1	1	26	1210	557	0.6	3.5	6.9	6.8	9.3	-7.1	-7.1	0	3	6	3
1189	1853	1	1	26	1211	557	0.6	3.5	6.9	6.8	9.3	-7.1	-7.1	0	4	6	3
1190	1853	2	1	44	1212	557	-2.8	0.6	6.9	3.9	6.8	-16.3	-7.1	1	1	1	1
1191	1853	2	1	44	1213	557	-2.8	0.6	6.9	3.9	6.8	-16.3	-7.1	0	4	1	2
1192	1853	2	1	44	1214	557	-2.8	0.6	6.9	3.9	6.8	-16.3	-7.1	1	3	1	2
1193	1853	2	1	44	1215	557	-2.8	0.6	6.9	3.9	6.8	-16.3	-7.1	0	6	2	2
1194	1853	2	1	44	1216	557	-2.8	0.6	6.9	3.9	6.8	-16.3	-7.1	1	1	2	2
1195	1853	2	1	44	1217	557	-2.8	0.6	6.9	3.9	6.8	-16.3	-7.1	0	3	2	2
1196	1853	2	1	44	1218	557	-2.8	0.6	6.9	3.9	6.8	-16.3	-7.1	1	4	2	2
1197	1853	2	1	44	1219	557	-2.8	0.6	6.9	3.9	6.8	-16.3	-7.1	0	4	3	3
1198	1853	2	1	44	1220	557	-2.8	0.6	6.9	3.9	6.8	-16.3	-7.1	1	3	3	3
1199	1853	2	1	44	1221	557	-2.8	0.6	6.9	3.9	6.8	-16.3	-7.1	0	4	3	3
1200	1853	2	1	44	1222	557	-2.8	0.6	6.9	3.9	6.8	-16.3	-7.1	0	3	4	3
1201	1853	2	1	44	1223	557	-2.8	0.6	6.9	3.9	6.8	-16.3	-7.1	1	1	4	3
1202	1853	2	1	44	1224	557	-2.8	0.6	6.9	3.9	6.8	-16.3	-7.1	0	3	4	3
1203	1853	2	1	44	1225	557	-2.8	0.6	6.9	3.9	6.8	-16.3	-7.1	0	3	4	3
1204	1853	2	1	44	1226	557	-2.8	0.6	6.9	3.9	6.8	-16.3	-7.1	1	3	4	3
1205	1853	2	1	44	1227	557	-2.8	0.6	6.9	3.9	6.8	-16.3	-7.1	1	6	4	3
1206	1853	2	1	44	1228	557	-2.8	0.6	6.9	3.9	6.8	-16.3	-7.1	1	3	5	3
1207	1853	2	1	44	1229	557	-2.8	0.6	6.9	3.9	6.8	-16.3	-7.1	1	3	5	3
1208	1853	2	1	44	1230	557	-2.8	0.6	6.9	3.9	6.8	-16.3	-7.1	1	3	5	3
1209	1853	2	1	44	1231	557	-2.8	0.6	6.9	3.9	6.8	-16.3	-7.1	1	1	5	3
1210	1853	2	1	44	1232	557	-2.8	0.6	6.9	3.9	6.8	-16.3	-7.1	0	4	5	3
1211	1853	2	1	44	1233	557	-2.8	0.6	6.9	3.9	6.8	-16.3	-7.1	0	6	5	3
1212	1853	2	1	44	1234	557	-2.8	0.6	6.9	3.9	6.8	-16.3	-7.1	0	3	5	3
1213	1853	2	1	44	1235	557	-2.8	0.6	6.9	3.9	6.8	-16.3	-7.1	1	4	5	3
1214	1853	2	1	44	1236	557	-2.8	0.6	6.9	3.9	6.8	-16.3	-7.1	0	3	6	3
1215	1853	2	1	44	1237	557	-2.8	0.6	6.9	3.9	6.8	-16.3	-7.1	1	3	6	3
1216	1853	2	1	44	1238	557	-2.8	0.6	6.9	3.9	6.8	-16.3	-7.1	1	3	6	3
1217	1853	2	1	44	1239	557	-2.8	0.6	6.9	3.9	6.8	-16.3	-7.1	1	3	6	3
1218	1853	3	2	48	1240	557	-4.4	-2.8	6.9	4.3	3.9	-20.8	-16.3	1	3	1	1
1219	1853	3	2	48	1241	557	-4.4	-2.8	6.9	4.3	3.9	-20.8	-16.3	0	6	1	1
1220	1853	3	2	48	1242	557	-4.4	-2.8	6.9	4.3	3.9	-20.8	-16.3	1	3	1	2
1221	1853	3	2	48	1243	557	-4.4	-2.8	6.9	4.3	3.9	-20.8	-16.3	1	6	1	2
1222	1853	3	2	48	1244	557	-4.4	-2.8	6.9	4.3	3.9	-20.8	-16.3	1	4	2	2
1223	1853	3	2	48	1245	557	-4.4	-2.8	6.9	4.3	3.9	-20.8	-16.3	1	3	2	2
1224	1853	3	2	48	1246	557	-4.4	-2.8	6.9	4.3	3.9	-20.8	-16.3	1	3	2	2
1225	1853	3	2	48	1247	557	-4.4	-2.8	6.9	4.3	3.9	-20.8	-16.3	1	3	2	2
1226	1853	3	2	48	1248	557	-4.4	-2.8	6.9	4.3	3.9	-20.8	-16.3	1	3	2	2
1227	1853	3	2	48	1249	557	-4.4	-2.8	6.9	4.3	3.9	-20.8	-16.3	1	1	2	2
1228	1853	3	2	48	1250	557	-4.4	-2.8	6.9	4.3	3.9	-20.8	-16.3	1	6	2	2
1229	1853	3	2	48	1251	557	-4.4	-2.8	6.9	4.3	3.9	-20.8	-16.3	1	6	2	2
1230	1853	3	2	48	1252	557	-4.4	-2.8	6.9	4.3	3.9	-20.8	-16.3	1	4	2	2
1231	1853	3	2	48	1253	557	-4.4	-2.8	6.9	4.3	3.9	-20.8	-16.3	0	4	3	3
1232	1853	3	2	48	1254	557	-4.4	-2.8	6.9	4.3	3.9	-20.8	-16.3	1	4	3	3
1233	1853	3	2	48	1255	557	-4.4	-2.8	6.9	4.3	3.9	-20.8	-16.3	1	6	3	3
1234	1853	3	2	48	1256	557	-4.4	-2.8	6.9	4.3	3.9	-20.8	-16.3	1	6	3	3
1235	1853	3	2	48	1257	557	-4.4	-2.8	6.9	4.3	3.9	-20.8	-16.3	1	4	3	3
1236	1853	3	2	48	1258	557	-4.4	-2.8	6.9	4.3	3.9	-20.8	-16.3	1	4	3	3
1237	1853	3	2	48	1259	557	-4.4	-2.8	6.9	4.3	3.9	-20.8	-16.3	1	3	4	3
1238	1853	3	2	48	1260	557	-4.4	-2.8	6.9	4.3	3.9	-20.8	-16.3	0	4	4	3
1239	1853	3	2	48	1261	557	-4.4	-2.8	6.9	4.3	3.9	-20.8	-16.3	0	3	5	3
1240	1853	3	2	48	1262	557	-4.4	-2.8	6.9	4.3	3.9	-20.8	-16.3	1	3	5	3
1241	1853	3	2	48	1263	557	-4.4	-2.8	6.9	4.3	3.9	-20.8	-16.3	1	1	5	3
1242	1853	3	2	48	1264	557	-4.4	-2.8	6.9	4.3	3.9	-20.8	-16.3	0	6	5	3
1243	1853	3	2	48	1265	557	-4.4	-2.8	6.9	4.3	3.9	-20.8	-16.3	1	6	5	3
1244	1853	3	2	48	1266	557	-4.4	-2.8	6.9	4.3	3.9	-20.8	-16.3	1	3	6	3
1245	1853	3	2	48	1267	557	-4.4	-2.8	6.9	4.3	3.9	-20.8	-16.3	1	6	6	3
1246	1853	3	2	48	1268	557	-4.4	-2.8	6.9	4.3	3.9	-20.8	-16.3	0	3	6	3
1247	1853	3	2	48	1269	557	-4.4	-2.8	6.9	4.3	3.9	-20.8	-16.3	1	4	6	3
1248	1853	3	2	48	1270	557	-4.4	-2.8	6.9	4.3	3.9	-20.8	-16.3	1	3	6	3
1249	1853	4	2	34	1271	557	4.2	-4.4	6.9	17.9	4.3	-4.8	-20.8	0	6	1	2
1250	1853	4	2	34	1272	557	4.2	-4.4	6.9	17.9	4.3	-4.8	-20.8	0	3	2	2
1251	1853	4	2	34	1273	557	4.2	-4.4	6.9	17.9	4.3	-4.8	-20.8	0	3	2	2
1252	1853	4	2	34	1274	557	4.2	-4.4	6.9	17.9	4.3	-4.8	-20.8	1	4	2	2
1253	1853	4	2	34	1275	557	4.2	-4.4	6.9	17.9	4.3	-4.8	-20.8	1	6	2	2
1254	1853	4	2	34	1276	557	4.2	-4.4	6.9	17.9	4.3	-4.8	-20.8	1	4	3	3
1255	1853	4	2	34	1277	557	4.2	-4.4	6.9	17.9	4.3	-4.8	-20.8	1	3	3	3
1256	1853	4	2	34	1278	557	4.2	-4.4	6.9	17.9	4.3	-4.8	-20.8	1	4	3	3
1257	1853	4	2	34	1279	557	4.2	-4.4	6.9	17.9	4.3	-4.8	-20.8	0	4	4	3
1258	1853	4	2	34	1280	557	4.2	-4.4	6.9	17.9	4.3	-4.8	-20.8	0	3	4	3
1259	1853	4	2	34	1281	557	4.2	-4.4	6.9	17.9	4.3	-4.8	-20.8	1	3	4	3
1260	1853	4	2	34	1282	557	4.2	-4.4	6.9	17.9	4.3	-4.8	-20.8	0	6	4	3
1261	1853	4	2	34	1283	557	4.2	-4.4	6.9	17.9	4.3	-4.8	-20.8	1	5	5	3
1262	1853	4	2	34	1284	557	4.2	-4.4	6.9	17.9	4.3	-4.8	-20.8	1	4	6	3
1263	1853	4	2	34	1285	557	4.2	-4.4	6.9	17.9	4.3	-4.8	-20.8	1	3	5	3
1264	1853	4	2	34	1286	557	4.2	-4.4	6.9	17.9	4.3	-4.8	-20.8	1	3	5	3
1265	1853	4	2	34	1287	557	4.2	-4.4	6.9	17.9	4.3	-4.8	-20.8	0	3	5	3
1266	1853	4	2	34	1288	557	4.2	-4.4	6.9	17.9	4.3	-4.8	-20.8	0	3	5	3
1267	1853	4	2	34	1289	557	4.2	-4.4	6.9	17.9	4.3	-4.8	-20.8	0	4	5	3
1268	1853	4	2	34	1290	557	4.2	-4.4	6.9	17.9	4.3	-4.8	-20.8	0	6	5	3
1269	1853	4	2	34	1291	557	4.2	-4.4	6.9	17.9	4.3	-4.8	-20.8	1	6	5	3
1270	1853	4	2	34	1292	557	4.2	-4.4	6.9	17.9	4.3	-4.8	-20.8	1	3	5	3
1271	1853	4	2	34	1293	557	4.2	-4.4	6.9	17.9	4.3	-4.8	-20.8	0	4	5	3
1272	1853	4	2	34	1294	557	4.2	-4.4	6.9	17.9	4.3	-4.8	-20.8	0	5	6	3
1273	1853	4	2	34	1295	557	4.2	-4.4	6.9	17.9	4.3	-4.8	-20.8	1	3	6	3
1274	1853	4	2	34	1296	557	4.2	-4.4	6.9	17.9	4.3	-4.8	-20.8	1	3	6	3
1275	1853	4	2	34	1297	557	4.2	-4.4	6.9	17.9	4.3	-4.8	-20.8	1	4	6	3
1276	1853	4	2	34	1298	557	4.2	-4.4	6.9	17.9	4.3	-4.8	-20.8	0	6	6	3
1277	1853	4	2	34	1299	557	4.2	-4.4	6.9	17.9	4.3	-4.8	-20.8	0	1	6	3
1278	1853	5	2	17	1300	557	12.3	4.2	6.9	27.8	17.9	2.8	-4.8	0	6	1	2
1279	1853	5	2	17	1301	557	12.3	4.2	6.9	27.8	17.9	2.8	-4.8	1	6	1	2
1280	1853	5	2	17	1302	557	12.3	4.2	6.9	27.8	17.9	2.8	-4.8	0	3	2	2
1281	1853	5	2	17	1303	557	12.3	4.2	6.9	27.8	17.9	2.8	-4.8	1	3	2	2
1282	1853	5	2	17	1304	557	12.3	4.2	6.9	27.8	17.9	2.8	-4.8	1	4	2	2
1283	1853	5	2	17	1305	557	12.3	4.2	6.9	27.8	17.9	2.8	-4.8	0	4	3	3
1284	1853	5	2	17	1306	557	12.3	4.2	6.9	27.8	17.9	2.8	-4.8	1	3	3	3
1285	1853	5	2	17	1307	557	12.3	4.2	6.9	27.8	17.9	2.8	-4.8	1	3	3	3
1286	1853	5	2	17	1308	557	12.3	4.2	6.9	27.8	17.9	2.8	-4.8	1	1	3	3
1287	1853	5	2	17	1309	557	12.3	4.2	6.9	27.8	17.9	2.8	-4.8	1	3	4	3
1288	1853	5	2	17	1310	557	12.3	4.2	6.9	27.8	17.9	2.8	-4.8	1	3	4	3
1289	1853	5	2	17	1311	557	12.3	4.2	6.9	27.8	17.9	2.8	-4.8	0	3	4	3
1290	1853	5	2	17	1312	557	12.3	4.2	6.9	27.8	17.9	2.8	-4.8	1	6	4	3
1291	1853	5	2	17	1313	557	12.3	4.2	6.9	27.8	17.9	2.8	-4.8	0	3	5	3
1292	1853	5	2	17	1314	557	12.3	4.2	6.9	27.8	17.9	2.8	-4.8	0	1	5	3
1293	1853	5	2	17	1315	557	12.3	4.2	6.9	27.8	17.9	2.8	-4.8	0	3	5	3
1294	1853	5	2	17	1316	557	12.3	4.2	6.9	27.8	17.9	2.8	-4.8	1	4	5	3
1295	1853	5	2	17	1317	557	12.3	4.2	6.9	27.8	17.9	2.8	-4.8	1	6	5	3
1296	1853	5	2	17	1318	557	12.3	4.2	6.9	27.8	17.9	2.8	-4.8	1	4	5	3
1297	1853	5	2	17	1319	557	12.3	4.2	6.9	27.8	17.9	2.8	-4.8	1	1	5	3
1298	1853	5	2	17	1320	557	12.3	4.2	6.9	27.8	17.9	2.8	-4.8	1	4	5	3
1299	1853	5	2	17	1321	557	12.3	4.2	6.9	27.8	17.9	2.8	-4.8	1	4	5	3
1300	1853	5	2	17	1322	557	12.3	4.2	6.9	27.8	17.9	2.8	-4.8	0	4	6	3
1301	1853	5	2	17	1323	557	12.3	4.2	6.9	27.8	17.9	2.8	-4.8	1	3	6	3
1302	1853	5	2	17	1324	557	12.3	4.2	6.9	27.8	17.9	2.8	-4.8	0	3	6	3
1303	1853	5	2	17	1325	557	12.3	4.2	6.9	27.8	17.9	2.8	-4.8	1	4	6	3
1304	1853	5	2	17	1326	557	12.3	4.2	6.9	27.8	17.9	2.8	-4.8	0	4	6	3
1305	1853	5	2	17	1327	557	12.3	4.2	6.9	27.8	17.9	2.8	-4.8	1	3	6	3
1306	1853	5	2	17	1328	557	12.3	4.2	6.9	27.8	17.9	2.8	-4.8	1	4	6	3
1307	1853	6	3	134	1329	557	17.9	12.3	6.9	31.8	27.8	9.3	2.8	1	3	1	2
1308	1853	6	3	134	1330	557	17.9	12.3	6.9	31.8	27.8	9.3	2.8	0	3	1	2
1309	1853	6	3	134	1331	557	17.9	12.3	6.9	31.8	27.8	9.3	2.8	1	5	2	2
1310	1853	6	3	134	1332	557	17.9	12.3	6.9	31.8	27.8	9.3	2.8	0	3	2	2
1311	1853	6	3	134	1333	557	17.9	12.3	6.9	31.8	27.8	9.3	2.8	0	1	2	2
1312	1853	6	3	134	1334	557	17.9	12.3	6.9	31.8	27.8	9.3	2.8	0	4	2	2
1313	1853	6	3	134	1335	557	17.9	12.3	6.9	31.8	27.8	9.3	2.8	0	6	2	2
1314	1853	6	3	134	1336	557	17.9	12.3	6.9	31.8	27.8	9.3	2.8	1	6	2	2
1315	1853	6	3	134	1337	557	17.9	12.3	6.9	31.8	27.8	9.3	2.8	1	4	2	2
1316	1853	6	3	134	1338	557	17.9	12.3	6.9	31.8	27.8	9.3	2.8	1	4	2	2
1317	1853	6	3	134	1339	557	17.9	12.3	6.9	31.8	27.8	9.3	2.8	0	4	3	3
1318	1853	6	3	134	1340	557	17.9	12.3	6.9	31.8	27.8	9.3	2.8	1	4	3	3
1319	1853	6	3	134	1341	557	17.9	12.3	6.9	31.8	27.8	9.3	2.8	1	6	3	3
1320	1853	6	3	134	1342	557	17.9	12.3	6.9	31.8	27.8	9.3	2.8	0	6	3	3
1321	1853	6	3	134	1343	557	17.9	12.3	6.9	31.8	27.8	9.3	2.8	0	4	4	3
1322	1853	6	3	134	1344	557	17.9	12.3	6.9	31.8	27.8	9.3	2.8	0	4	5	3
1323	1853	6	3	134	1345	557	17.9	12.3	6.9	31.8	27.8	9.3	2.8	1	4	5	3
1324	1853	6	3	134	1346	557	17.9	12.3	6.9	31.8	27.8	9.3	2.8	1	4	6	3
1325	1853	6	3	134	1347	557	17.9	12.3	6.9	31.8	27.8	9.3	2.8	1	5	6	3
1326	1853	7	3	95	1348	557	19.4	17.9	6.9	30	31.8	11.4	9.3	0	3	1	1
1327	1853	7	3	95	1349	557	19.4	17.9	6.9	30	31.8	11.4	9.3	0	3	2	2
1328	1853	7	3	95	1350	557	19.4	17.9	6.9	30	31.8	11.4	9.3	1	3	2	2
1329	1853	7	3	95	1351	557	19.4	17.9	6.9	30	31.8	11.4	9.3	1	1	2	2
1330	1853	7	3	95	1352	557	19.4	17.9	6.9	30	31.8	11.4	9.3	0	1	2	2
1331	1853	7	3	95	1353	557	19.4	17.9	6.9	30	31.8	11.4	9.3	0	3	4	3
1332	1853	7	3	95	1354	557	19.4	17.9	6.9	30	31.8	11.4	9.3	1	4	4	3
1333	1853	7	3	95	1355	557	19.4	17.9	6.9	30	31.8	11.4	9.3	0	4	5	3
1334	1853	7	3	95	1356	557	19.4	17.9	6.9	30	31.8	11.4	9.3	1	6	5	3
1335	1853	7	3	95	1357	557	19.4	17.9	6.9	30	31.8	11.4	9.3	0	4	5	3
1336	1853	7	3	95	1358	557	19.4	17.9	6.9	30	31.8	11.4	9.3	0	4	5	3
1337	1853	7	3	95	1359	557	19.4	17.9	6.9	30	31.8	11.4	9.3	1	4	5	3
1338	1853	7	3	95	1360	557	19.4	17.9	6.9	30	31.8	11.4	9.3	1	4	5	3
1339	1853	7	3	95	1361	557	19.4	17.9	6.9	30	31.8	11.4	9.3	1	4	5	3
1340	1853	7	3	95	1362	557	19.4	17.9	6.9	30	31.8	11.4	9.3	0	4	5	3
1341	1853	7	3	95	1363	557	19.4	17.9	6.9	30	31.8	11.4	9.3	1	4	5	3
1342	1853	7	3	95	1364	557	19.4	17.9	6.9	30	31.8	11.4	9.3	0	4	6	3
1343	1853	7	3	95	1365	557	19.4	17.9	6.9	30	31.8	11.4	9.3	0	3	6	3
1344	1853	7	3	95	1366	557	19.4	17.9	6.9	30	31.8	11.4	9.3	0	3	6	3
1345	1853	7	3	95	1367	557	19.4	17.9	6.9	30	31.8	11.4	9.3	1	4	6	3
1346	1853	9	4	67	1368	557	13.5	17	6.9	24.3	30.1	6.3	9.3	0	3	1	1
1347	1853	9	4	67	1369	557	13.5	17	6.9	24.3	30.1	6.3	9.3	0	4	1	2
1348	1853	9	4	67	1370	557	13.5	17	6.9	24.3	30.1	6.3	9.3	0	4	1	2
1349	1853	9	4	67	1371	557	13.5	17	6.9	24.3	30.1	6.3	9.3	1	4	1	2
1350	1853	9	4	67	1372	557	13.5	17	6.9	24.3	30.1	6.3	9.3	0	3	2	2
1351	1853	9	4	67	1373	557	13.5	17	6.9	24.3	30.1	6.3	9.3	1	3	2	2
1352	1853	9	4	67	1374	557	13.5	17	6.9	24.3	30.1	6.3	9.3	1	3	2	2
1353	1853	9	4	67	1375	557	13.5	17	6.9	24.3	30.1	6.3	9.3	0	6	2	2
1354	1853	9	4	67	1376	557	13.5	17	6.9	24.3	30.1	6.3	9.3	1	3	2	2
1355	1853	9	4	67	1377	557	13.5	17	6.9	24.3	30.1	6.3	9.3	1	3	2	2
1356	1853	9	4	67	1378	557	13.5	17	6.9	24.3	30.1	6.3	9.3	1	3	2	2
1357	1853	9	4	67	1379	557	13.5	17	6.9	24.3	30.1	6.3	9.3	0	3	2	2
1358	1853	9	4	67	1380	557	13.5	17	6.9	24.3	30.1	6.3	9.3	1	6	2	2
1359	1853	9	4	67	1381	557	13.5	17	6.9	24.3	30.1	6.3	9.3	0	6	2	2
1360	1853	9	4	67	1382	557	13.5	17	6.9	24.3	30.1	6.3	9.3	0	3	3	3
1361	1853	9	4	67	1383	557	13.5	17	6.9	24.3	30.1	6.3	9.3	1	3	3	3
1362	1853	9	4	67	1384	557	13.5	17	6.9	24.3	30.1	6.3	9.3	1	1	3	3
1363	1853	9	4	67	1385	557	13.5	17	6.9	24.3	30.1	6.3	9.3	1	4	3	3
1364	1853	9	4	67	1386	557	13.5	17	6.9	24.3	30.1	6.3	9.3	0	1	3	3
1365	1853	9	4	67	1387	557	13.5	17	6.9	24.3	30.1	6.3	9.3	1	3	3	3
1366	1853	9	4	67	1388	557	13.5	17	6.9	24.3	30.1	6.3	9.3	0	5	3	3
1367	1853	9	4	67	1389	557	13.5	17	6.9	24.3	30.1	6.3	9.3	1	3	4	3
1368	1853	9	4	67	1390	557	13.5	17	6.9	24.3	30.1	6.3	9.3	1	6	5	3
1369	1853	9	4	67	1391	557	13.5	17	6.9	24.3	30.1	6.3	9.3	0	6	5	3
1370	1853	9	4	67	1392	557	13.5	17	6.9	24.3	30.1	6.3	9.3	1	3	5	3
1371	1853	9	4	67	1393	557	13.5	17	6.9	24.3	30.1	6.3	9.3	0	4	5	3
1372	1853	9	4	67	1394	557	13.5	17	6.9	24.3	30.1	6.3	9.3	1	1	5	3
1373	1853	9	4	67	1395	557	13.5	17	6.9	24.3	30.1	6.3	9.3	0	3	5	3
1374	1853	9	4	67	1396	557	13.5	17	6.9	24.3	30.1	6.3	9.3	0	3	5	3
1375	1853	9	4	67	1397	557	13.5	17	6.9	24.3	30.1	6.3	9.3	0	4	5	3
1376	1853	9	4	67	1398	557	13.5	17	6.9	24.3	30.1	6.3	9.3	1	4	5	3
1377	1853	9	4	67	1399	557	13.5	17	6.9	24.3	30.1	6.3	9.3	1	6	5	3
1378	1853	9	4	67	1400	557	13.5	17	6.9	24.3	30.1	6.3	9.3	1	1	5	3
1379	1853	9	4	67	1401	557	13.5	17	6.9	24.3	30.1	6.3	9.3	1	3	5	3
1380	1853	9	4	67	1402	557	13.5	17	6.9	24.3	30.1	6.3	9.3	0	6	5	3
1381	1853	9	4	67	1403	557	13.5	17	6.9	24.3	30.1	6.3	9.3	1	4	5	3
1382	1853	9	4	67	1404	557	13.5	17	6.9	24.3	30.1	6.3	9.3	0	6	5	3
1383	1853	9	4	67	1405	557	13.5	17	6.9	24.3	30.1	6.3	9.3	0	6	5	3
1384	1853	9	4	67	1406	557	13.5	17	6.9	24.3	30.1	6.3	9.3	1	6	5	3
1385	1853	9	4	67	1407	557	13.5	17	6.9	24.3	30.1	6.3	9.3	0	6	6	3
1386	1853	9	4	67	1408	557	13.5	17	6.9	24.3	30.1	6.3	9.3	0	6	6	3
1387	1853	9	4	67	1409	557	13.5	17	6.9	24.3	30.1	6.3	9.3	0	6	6	3
1388	1853	9	4	67	1410	557	13.5	17	6.9	24.3	30.1	6.3	9.3	1	6	6	3
1389	1853	9	4	67	1411	557	13.5	17	6.9	24.3	30.1	6.3	9.3	1	3	6	3
1390	1853	9	4	67	1412	557	13.5	17	6.9	24.3	30.1	6.3	9.3	0	3	3	3
1391	1853	10	4	30	1413	557	8.6	13.5	6.9	16.9	24.3	-0.8	6.3	0	3	2	2
1392	1853	10	4	30	1414	557	8.6	13.5	6.9	16.9	24.3	-0.8	6.3	1	3	2	2
1393	1853	10	4	30	1415	557	8.6	13.5	6.9	16.9	24.3	-0.8	6.3	1	3	2	2
1394	1853	10	4	30	1416	557	8.6	13.5	6.9	16.9	24.3	-0.8	6.3	0	3	2	2
1395	1853	10	4	30	1417	557	8.6	13.5	6.9	16.9	24.3	-0.8	6.3	1	3	2	2
1396	1853	10	4	30	1418	557	8.6	13.5	6.9	16.9	24.3	-0.8	6.3	1	4	2	2
1397	1853	10	4	30	1419	557	8.6	13.5	6.9	16.9	24.3	-0.8	6.3	0	6	3	3
1398	1853	10	4	30	1420	557	8.6	13.5	6.9	16.9	24.3	-0.8	6.3	0	3	3	3
1399	1853	10	4	30	1421	557	8.6	13.5	6.9	16.9	24.3	-0.8	6.3	0	3	3	3
1400	1853	10	4	30	1422	557	8.6	13.5	6.9	16.9	24.3	-0.8	6.3	0	3	3	3
1401	1853	10	4	30	1423	557	8.6	13.5	6.9	16.9	24.3	-0.8	6.3	0	1	3	3
1402	1853	10	4	30	1424	557	8.6	13.5	6.9	16.9	24.3	-0.8	6.3	1	3	4	3
1403	1853	10	4	30	1425	557	8.6	13.5	6.9	16.9	24.3	-0.8	6.3	0	3	5	3
1404	1853	10	4	30	1426	557	8.6	13.5	6.9	16.9	24.3	-0.8	6.3	1	3	5	3
1405	1853	10	4	30	1427	557	8.6	13.5	6.9	16.9	24.3	-0.8	6.3	0	6	5	3
1406	1853	10	4	30	1428	557	8.6	13.5	6.9	16.9	24.3	-0.8	6.3	0	6	5	3
1407	1853	10	4	30	1429	557	8.6	13.5	6.9	16.9	24.3	-0.8	6.3	1	4	5	3
1408	1853	10	4	30	1430	557	8.6	13.5	6.9	16.9	24.3	-0.8	6.3	1	3	5	3
1409	1853	10	4	30	1431	557	8.6	13.5	6.9	16.9	24.3	-0.8	6.3	0	3	5	3
1410	1853	10	4	30	1432	557	8.6	13.5	6.9	16.9	24.3	-0.8	6.3	1	1	5	3
1411	1853	10	4	30	1433	557	8.6	13.5	6.9	16.9	24.3	-0.8	6.3	0	6	5	3
1412	1853	10	4	30	1434	557	8.6	13.5	6.9	16.9	24.3	-0.8	6.3	0	3	6	3
1413	1853	10	4	30	1435	557	8.6	13.5	6.9	16.9	24.3	-0.8	6.3	1	3	6	3
1414	1853	10	4	30	1436	557	8.6	13.5	6.9	16.9	24.3	-0.8	6.3	1	3	6	3
1415	1853	10	4	30	1437	557	8.6	13.5	6.9	16.9	24.3	-0.8	6.3	1	4	6	3
1416	1853	11	4	8	1438	557	1.4	8.6	6.9	9	16.9	-6.8	-0.8	0	4	2	2
1417	1853	11	4	8	1439	557	1.4	8.6	6.9	9	16.9	-6.8	-0.8	0	3	2	2
1418	1853	11	4	8	1440	557	1.4	8.6	6.9	9	16.9	-6.8	-0.8	1	3	2	2
1419	1853	11	4	8	1441	557	1.4	8.6	6.9	9	16.9	-6.8	-0.8	0	3	2	2
1420	1853	11	4	8	1442	557	1.4	8.6	6.9	9	16.9	-6.8	-0.8	1	3	2	2
1421	1853	11	4	8	1443	557	1.4	8.6	6.9	9	16.9	-6.8	-0.8	1	6	2	2
1422	1853	11	4	8	1444	557	1.4	8.6	6.9	9	16.9	-6.8	-0.8	1	6	2	2
1423	1853	11	4	8	1445	557	1.4	8.6	6.9	9	16.9	-6.8	-0.8	1	1	3	3
1424	1853	11	4	8	1446	557	1.4	8.6	6.9	9	16.9	-6.8	-0.8	0	4	3	3
1425	1853	11	4	8	1447	557	1.4	8.6	6.9	9	16.9	-6.8	-0.8	1	4	3	3
1426	1853	11	4	8	1448	557	1.4	8.6	6.9	9	16.9	-6.8	-0.8	0	3	3	3
1427	1853	11	4	8	1449	557	1.4	8.6	6.9	9	16.9	-6.8	-0.8	1	3	3	3
1428	1853	11	4	8	1450	557	1.4	8.6	6.9	9	16.9	-6.8	-0.8	1	3	3	3
1429	1853	11	4	8	1451	557	1.4	8.6	6.9	9	16.9	-6.8	-0.8	1	3	4	3
1430	1853	11	4	8	1452	557	1.4	8.6	6.9	9	16.9	-6.8	-0.8	0	3	4	3
1431	1853	11	4	8	1453	557	1.4	8.6	6.9	9	16.9	-6.8	-0.8	0	4	4	3
1432	1853	11	4	8	1454	557	1.4	8.6	6.9	9	16.9	-6.8	-0.8	0	3	5	3
1433	1853	11	4	8	1455	557	1.4	8.6	6.9	9	16.9	-6.8	-0.8	0	4	5	3
1434	1853	11	4	8	1456	557	1.4	8.6	6.9	9	16.9	-6.8	-0.8	0	4	5	3
1435	1853	11	4	8	1457	557	1.4	8.6	6.9	9	16.9	-6.8	-0.8	0	3	5	3
1436	1853	11	4	8	1458	557	1.4	8.6	6.9	9	16.9	-6.8	-0.8	0	3	5	3
1437	1853	11	4	8	1459	557	1.4	8.6	6.9	9	16.9	-6.8	-0.8	1	4	5	3
1438	1853	11	4	8	1460	557	1.4	8.6	6.9	9	16.9	-6.8	-0.8	1	4	5	3
1439	1853	11	4	8	1461	557	1.4	8.6	6.9	9	16.9	-6.8	-0.8	1	3	6	3
1440	1853	11	4	8	1462	557	1.4	8.6	6.9	9	16.9	-6.8	-0.8	1	3	6	3
1441	1853	11	4	8	1463	557	1.4	8.6	6.9	9	16.9	-6.8	-0.8	0	6	6	3
1442	1853	11	4	8	1464	557	1.4	8.6	6.9	9	16.9	-6.8	-0.8	0	4	6	3
1443	1853	11	4	8	1465	557	1.4	8.6	6.9	9	16.9	-6.8	-0.8	0	3	6	3
1444	1853	11	4	8	1466	557	1.4	8.6	6.9	9	16.9	-6.8	-0.8	1	3	6	3
1445	1853	11	4	8	1467	557	1.4	8.6	6.9	9	16.9	-6.8	-0.8	1	3	6	3
1446	1853	12	1	12	1468	557	-4.5	1.4	6.9	2.4	9	-18.5	-6.8	1	6	2	2
1447	1853	12	1	12	1469	557	-4.5	1.4	6.9	2.4	9	-18.5	-6.8	0	3	2	2
1448	1853	12	1	12	1470	557	-4.5	1.4	6.9	2.4	9	-18.5	-6.8	1	3	2	2
1449	1853	12	1	12	1471	557	-4.5	1.4	6.9	2.4	9	-18.5	-6.8	0	3	2	2
1450	1853	12	1	12	1472	557	-4.5	1.4	6.9	2.4	9	-18.5	-6.8	0	1	2	2
1451	1853	12	1	12	1473	557	-4.5	1.4	6.9	2.4	9	-18.5	-6.8	1	6	2	2
1452	1853	12	1	12	1474	557	-4.5	1.4	6.9	2.4	9	-18.5	-6.8	1	6	2	2
1453	1853	12	1	12	1475	557	-4.5	1.4	6.9	2.4	9	-18.5	-6.8	1	3	3	3
1454	1853	12	1	12	1476	557	-4.5	1.4	6.9	2.4	9	-18.5	-6.8	1	4	3	3
1455	1853	12	1	12	1477	557	-4.5	1.4	6.9	2.4	9	-18.5	-6.8	0	3	4	3
1456	1853	12	1	12	1478	557	-4.5	1.4	6.9	2.4	9	-18.5	-6.8	0	5	5	3
1457	1853	12	1	12	1479	557	-4.5	1.4	6.9	2.4	9	-18.5	-6.8	0	3	5	3
1458	1853	12	1	12	1480	557	-4.5	1.4	6.9	2.4	9	-18.5	-6.8	1	6	5	3
1459	1853	12	1	12	1481	557	-4.5	1.4	6.9	2.4	9	-18.5	-6.8	1	3	5	3
1460	1853	12	1	12	1482	557	-4.5	1.4	6.9	2.4	9	-18.5	-6.8	1	1	5	3
1461	1853	12	1	12	1483	557	-4.5	1.4	6.9	2.4	9	-18.5	-6.8	1	6	5	3
1462	1853	12	1	12	1484	557	-4.5	1.4	6.9	2.4	9	-18.5	-6.8	0	6	5	3
1463	1853	12	1	12	1485	557	-4.5	1.4	6.9	2.4	9	-18.5	-6.8	0	6	5	3
1464	1853	12	1	12	1486	557	-4.5	1.4	6.9	2.4	9	-18.5	-6.8	1	6	5	3
1465	1853	12	1	12	1487	557	-4.5	1.4	6.9	2.4	9	-18.5	-6.8	1	4	5	3
1466	1853	12	1	12	1488	557	-4.5	1.4	6.9	2.4	9	-18.5	-6.8	1	1	5	3
1467	1853	12	1	12	1489	557	-4.5	1.4	6.9	2.4	9	-18.5	-6.8	0	4	5	3
1468	1853	12	1	12	1490	557	-4.5	1.4	6.9	2.4	9	-18.5	-6.8	1	4	5	3
1469	1853	12	1	12	1491	557	-4.5	1.4	6.9	2.4	9	-18.5	-6.8	0	4	5	3
1470	1853	12	1	12	1492	557	-4.5	1.4	6.9	2.4	9	-18.5	-6.8	0	4	5	3
1471	1853	12	1	12	1493	557	-4.5	1.4	6.9	2.4	9	-18.5	-6.8	1	1	6	3
1472	1853	12	1	12	1494	557	-4.5	1.4	6.9	2.4	9	-18.5	-6.8	0	4	6	3
1473	1853	12	1	12	1495	557	-4.5	1.4	6.9	2.4	9	-18.5	-6.8	0	4	6	3
1474	1854	1	1	44	1496	647	-2.1	-4.5	7.9	6.1	2.4	-13.4	-18.5	0	4	1	2
1475	1854	1	1	44	1497	647	-2.1	-4.5	7.9	6.1	2.4	-13.4	-18.5	1	3	2	2
1476	1854	1	1	44	1498	647	-2.1	-4.5	7.9	6.1	2.4	-13.4	-18.5	0	3	2	2
1477	1854	1	1	44	1499	647	-2.1	-4.5	7.9	6.1	2.4	-13.4	-18.5	0	3	2	2
1478	1854	1	1	44	1500	647	-2.1	-4.5	7.9	6.1	2.4	-13.4	-18.5	1	3	2	2
1479	1854	1	1	44	1501	647	-2.1	-4.5	7.9	6.1	2.4	-13.4	-18.5	1	3	2	2
1480	1854	1	1	44	1502	647	-2.1	-4.5	7.9	6.1	2.4	-13.4	-18.5	0	3	2	2
1481	1854	1	1	44	1503	647	-2.1	-4.5	7.9	6.1	2.4	-13.4	-18.5	0	4	3	3
1482	1854	1	1	44	1504	647	-2.1	-4.5	7.9	6.1	2.4	-13.4	-18.5	1	4	3	3
1483	1854	1	1	44	1505	647	-2.1	-4.5	7.9	6.1	2.4	-13.4	-18.5	1	3	3	3
1484	1854	1	1	44	1506	647	-2.1	-4.5	7.9	6.1	2.4	-13.4	-18.5	1	4	3	3
1485	1854	1	1	44	1507	647	-2.1	-4.5	7.9	6.1	2.4	-13.4	-18.5	1	1	3	3
1486	1854	1	1	44	1508	647	-2.1	-4.5	7.9	6.1	2.4	-13.4	-18.5	0	3	4	3
1487	1854	1	1	44	1509	647	-2.1	-4.5	7.9	6.1	2.4	-13.4	-18.5	0	3	4	3
1488	1854	1	1	44	1510	647	-2.1	-4.5	7.9	6.1	2.4	-13.4	-18.5	0	3	4	3
1489	1854	1	1	44	1511	647	-2.1	-4.5	7.9	6.1	2.4	-13.4	-18.5	0	6	5	3
1490	1854	1	1	44	1512	647	-2.1	-4.5	7.9	6.1	2.4	-13.4	-18.5	1	6	5	3
1491	1854	1	1	44	1513	647	-2.1	-4.5	7.9	6.1	2.4	-13.4	-18.5	1	6	5	3
1492	1854	1	1	44	1514	647	-2.1	-4.5	7.9	6.1	2.4	-13.4	-18.5	1	6	5	3
1493	1854	1	1	44	1515	647	-2.1	-4.5	7.9	6.1	2.4	-13.4	-18.5	0	4	5	3
1494	1854	1	1	44	1516	647	-2.1	-4.5	7.9	6.1	2.4	-13.4	-18.5	1	1	5	3
1495	1854	1	1	44	1517	647	-2.1	-4.5	7.9	6.1	2.4	-13.4	-18.5	0	4	5	3
1496	1854	1	1	44	1518	647	-2.1	-4.5	7.9	6.1	2.4	-13.4	-18.5	1	6	6	3
1497	1854	1	1	44	1519	647	-2.1	-4.5	7.9	6.1	2.4	-13.4	-18.5	0	5	6	3
1498	1854	1	1	44	1520	647	-2.1	-4.5	7.9	6.1	2.4	-13.4	-18.5	0	1	6	3
1499	1854	1	1	44	1521	647	-2.1	-4.5	7.9	6.1	2.4	-13.4	-18.5	1	3	6	3
1500	1854	1	1	44	1522	647	-2.1	-4.5	7.9	6.1	2.4	-13.4	-18.5	0	4	6	3
1501	1854	2	1	35	1523	647	-1	-2.1	7.9	5.1	6.1	-13	-13.4	1	3	2	2
1502	1854	2	1	35	1524	647	-1	-2.1	7.9	5.1	6.1	-13	-13.4	1	5	2	2
1503	1854	2	1	35	1525	647	-1	-2.1	7.9	5.1	6.1	-13	-13.4	1	6	2	2
1504	1854	2	1	35	1526	647	-1	-2.1	7.9	5.1	6.1	-13	-13.4	0	3	2	2
1505	1854	2	1	35	1527	647	-1	-2.1	7.9	5.1	6.1	-13	-13.4	0	1	2	2
1506	1854	2	1	35	1528	647	-1	-2.1	7.9	5.1	6.1	-13	-13.4	1	6	2	2
1507	1854	2	1	35	1529	647	-1	-2.1	7.9	5.1	6.1	-13	-13.4	1	4	2	2
1508	1854	2	1	35	1530	647	-1	-2.1	7.9	5.1	6.1	-13	-13.4	0	4	2	2
1509	1854	2	1	35	1531	647	-1	-2.1	7.9	5.1	6.1	-13	-13.4	0	1	3	3
1510	1854	2	1	35	1532	647	-1	-2.1	7.9	5.1	6.1	-13	-13.4	1	1	3	3
1511	1854	2	1	35	1533	647	-1	-2.1	7.9	5.1	6.1	-13	-13.4	0	4	3	3
1512	1854	2	1	35	1534	647	-1	-2.1	7.9	5.1	6.1	-13	-13.4	1	3	4	3
1513	1854	2	1	35	1535	647	-1	-2.1	7.9	5.1	6.1	-13	-13.4	0	3	4	3
1514	1854	2	1	35	1536	647	-1	-2.1	7.9	5.1	6.1	-13	-13.4	0	3	5	3
1515	1854	2	1	35	1537	647	-1	-2.1	7.9	5.1	6.1	-13	-13.4	1	6	5	3
1516	1854	2	1	35	1538	647	-1	-2.1	7.9	5.1	6.1	-13	-13.4	0	4	5	3
1517	1854	2	1	35	1539	647	-1	-2.1	7.9	5.1	6.1	-13	-13.4	1	3	5	3
1518	1854	2	1	35	1540	647	-1	-2.1	7.9	5.1	6.1	-13	-13.4	0	3	5	3
1519	1854	2	1	35	1541	647	-1	-2.1	7.9	5.1	6.1	-13	-13.4	1	4	5	3
1520	1854	2	1	35	1542	647	-1	-2.1	7.9	5.1	6.1	-13	-13.4	1	4	5	3
1521	1854	2	1	35	1543	647	-1	-2.1	7.9	5.1	6.1	-13	-13.4	1	3	6	3
1522	1854	2	1	35	1544	647	-1	-2.1	7.9	5.1	6.1	-13	-13.4	0	3	6	3
1523	1854	2	1	35	1545	647	-1	-2.1	7.9	5.1	6.1	-13	-13.4	0	3	6	3
1524	1854	3	2	26	1546	647	2.2	-1	7.9	10.5	5.1	-5.3	-13	1	3	1	1
1525	1854	3	2	26	1547	647	2.2	-1	7.9	10.5	5.1	-5.3	-13	1	4	1	2
1526	1854	3	2	26	1548	647	2.2	-1	7.9	10.5	5.1	-5.3	-13	0	3	2	2
1527	1854	3	2	26	1549	647	2.2	-1	7.9	10.5	5.1	-5.3	-13	1	3	2	2
1528	1854	3	2	26	1550	647	2.2	-1	7.9	10.5	5.1	-5.3	-13	1	6	2	2
1529	1854	3	2	26	1551	647	2.2	-1	7.9	10.5	5.1	-5.3	-13	1	4	2	2
1530	1854	3	2	26	1552	647	2.2	-1	7.9	10.5	5.1	-5.3	-13	1	4	2	2
1531	1854	3	2	26	1553	647	2.2	-1	7.9	10.5	5.1	-5.3	-13	0	3	3	3
1532	1854	3	2	26	1554	647	2.2	-1	7.9	10.5	5.1	-5.3	-13	1	3	3	3
1533	1854	3	2	26	1555	647	2.2	-1	7.9	10.5	5.1	-5.3	-13	0	3	4	3
1534	1854	3	2	26	1556	647	2.2	-1	7.9	10.5	5.1	-5.3	-13	1	3	4	3
1535	1854	3	2	26	1557	647	2.2	-1	7.9	10.5	5.1	-5.3	-13	0	3	4	3
1536	1854	3	2	26	1558	647	2.2	-1	7.9	10.5	5.1	-5.3	-13	0	3	4	3
1537	1854	3	2	26	1559	647	2.2	-1	7.9	10.5	5.1	-5.3	-13	1	3	4	3
1538	1854	3	2	26	1560	647	2.2	-1	7.9	10.5	5.1	-5.3	-13	0	6	4	3
1539	1854	3	2	26	1561	647	2.2	-1	7.9	10.5	5.1	-5.3	-13	0	6	4	3
1540	1854	3	2	26	1562	647	2.2	-1	7.9	10.5	5.1	-5.3	-13	0	5	5	3
1541	1854	3	2	26	1563	647	2.2	-1	7.9	10.5	5.1	-5.3	-13	1	3	5	3
1542	1854	3	2	26	1564	647	2.2	-1	7.9	10.5	5.1	-5.3	-13	1	3	5	3
1543	1854	3	2	26	1565	647	2.2	-1	7.9	10.5	5.1	-5.3	-13	0	3	5	3
1544	1854	3	2	26	1566	647	2.2	-1	7.9	10.5	5.1	-5.3	-13	0	4	5	3
1545	1854	3	2	26	1567	647	2.2	-1	7.9	10.5	5.1	-5.3	-13	0	4	5	3
1546	1854	3	2	26	1568	647	2.2	-1	7.9	10.5	5.1	-5.3	-13	1	4	5	3
1547	1854	3	2	26	1569	647	2.2	-1	7.9	10.5	5.1	-5.3	-13	0	3	6	3
1548	1854	4	2	12	1570	647	6.5	2.2	7.9	20.3	10.5	-3.4	-5.3	0	3	2	2
1549	1854	4	2	12	1571	647	6.5	2.2	7.9	20.3	10.5	-3.4	-5.3	1	3	2	2
1550	1854	4	2	12	1572	647	6.5	2.2	7.9	20.3	10.5	-3.4	-5.3	0	6	2	2
1551	1854	4	2	12	1573	647	6.5	2.2	7.9	20.3	10.5	-3.4	-5.3	1	4	2	2
1552	1854	4	2	12	1574	647	6.5	2.2	7.9	20.3	10.5	-3.4	-5.3	0	3	3	3
1553	1854	4	2	12	1575	647	6.5	2.2	7.9	20.3	10.5	-3.4	-5.3	0	3	3	3
1554	1854	4	2	12	1576	647	6.5	2.2	7.9	20.3	10.5	-3.4	-5.3	1	3	3	3
1555	1854	4	2	12	1577	647	6.5	2.2	7.9	20.3	10.5	-3.4	-5.3	0	6	3	3
1556	1854	4	2	12	1578	647	6.5	2.2	7.9	20.3	10.5	-3.4	-5.3	1	4	4	3
1557	1854	4	2	12	1579	647	6.5	2.2	7.9	20.3	10.5	-3.4	-5.3	0	6	4	3
1558	1854	4	2	12	1580	647	6.5	2.2	7.9	20.3	10.5	-3.4	-5.3	1	6	4	3
1559	1854	4	2	12	1581	647	6.5	2.2	7.9	20.3	10.5	-3.4	-5.3	0	3	5	3
1560	1854	4	2	12	1582	647	6.5	2.2	7.9	20.3	10.5	-3.4	-5.3	0	3	5	3
1561	1854	4	2	12	1583	647	6.5	2.2	7.9	20.3	10.5	-3.4	-5.3	0	6	5	3
1562	1854	4	2	12	1584	647	6.5	2.2	7.9	20.3	10.5	-3.4	-5.3	0	6	5	3
1563	1854	4	2	12	1585	647	6.5	2.2	7.9	20.3	10.5	-3.4	-5.3	1	6	5	3
1564	1854	4	2	12	1586	647	6.5	2.2	7.9	20.3	10.5	-3.4	-5.3	1	4	5	3
1565	1854	4	2	12	1587	647	6.5	2.2	7.9	20.3	10.5	-3.4	-5.3	1	3	5	3
1566	1854	4	2	12	1588	647	6.5	2.2	7.9	20.3	10.5	-3.4	-5.3	0	6	5	3
1567	1854	4	2	12	1589	647	6.5	2.2	7.9	20.3	10.5	-3.4	-5.3	1	6	6	3
1568	1854	4	2	12	1590	647	6.5	2.2	7.9	20.3	10.5	-3.4	-5.3	1	6	6	3
1569	1854	5	2	19	1591	647	14.4	6.5	7.9	25.1	20.3	5.3	-3.4	1	1	1	2
1570	1854	5	2	19	1592	647	14.4	6.5	7.9	25.1	20.3	5.3	-3.4	0	3	1	2
1571	1854	5	2	19	1593	647	14.4	6.5	7.9	25.1	20.3	5.3	-3.4	1	4	2	2
1572	1854	5	2	19	1594	647	14.4	6.5	7.9	25.1	20.3	5.3	-3.4	1	3	2	2
1573	1854	5	2	19	1595	647	14.4	6.5	7.9	25.1	20.3	5.3	-3.4	1	6	2	2
1574	1854	5	2	19	1596	647	14.4	6.5	7.9	25.1	20.3	5.3	-3.4	1	6	2	2
1575	1854	5	2	19	1597	647	14.4	6.5	7.9	25.1	20.3	5.3	-3.4	1	6	2	2
1576	1854	5	2	19	1598	647	14.4	6.5	7.9	25.1	20.3	5.3	-3.4	1	3	2	2
1577	1854	5	2	19	1599	647	14.4	6.5	7.9	25.1	20.3	5.3	-3.4	0	3	2	2
1578	1854	5	2	19	1600	647	14.4	6.5	7.9	25.1	20.3	5.3	-3.4	1	4	3	3
1579	1854	5	2	19	1601	647	14.4	6.5	7.9	25.1	20.3	5.3	-3.4	1	2	3	3
1580	1854	5	2	19	1602	647	14.4	6.5	7.9	25.1	20.3	5.3	-3.4	0	3	3	3
1581	1854	5	2	19	1603	647	14.4	6.5	7.9	25.1	20.3	5.3	-3.4	0	3	3	3
1582	1854	5	2	19	1604	647	14.4	6.5	7.9	25.1	20.3	5.3	-3.4	1	3	3	3
1583	1854	5	2	19	1605	647	14.4	6.5	7.9	25.1	20.3	5.3	-3.4	1	1	3	3
1584	1854	5	2	19	1606	647	14.4	6.5	7.9	25.1	20.3	5.3	-3.4	1	3	4	3
1585	1854	5	2	19	1607	647	14.4	6.5	7.9	25.1	20.3	5.3	-3.4	1	4	4	3
1586	1854	5	2	19	1608	647	14.4	6.5	7.9	25.1	20.3	5.3	-3.4	0	3	5	3
1587	1854	5	2	19	1609	647	14.4	6.5	7.9	25.1	20.3	5.3	-3.4	0	5	5	3
1588	1854	5	2	19	1610	647	14.4	6.5	7.9	25.1	20.3	5.3	-3.4	0	3	5	3
1589	1854	5	2	19	1611	647	14.4	6.5	7.9	25.1	20.3	5.3	-3.4	0	3	5	3
1590	1854	5	2	19	1612	647	14.4	6.5	7.9	25.1	20.3	5.3	-3.4	1	4	5	3
1591	1854	5	2	19	1613	647	14.4	6.5	7.9	25.1	20.3	5.3	-3.4	0	6	6	3
1592	1854	5	2	19	1614	647	14.4	6.5	7.9	25.1	20.3	5.3	-3.4	1	6	6	3
1593	1854	5	2	19	1615	647	14.4	6.5	7.9	25.1	20.3	5.3	-3.4	0	3	6	3
1594	1854	5	2	19	1616	647	14.4	6.5	7.9	25.1	20.3	5.3	-3.4	1	6	6	3
1595	1854	5	2	19	1617	647	14.4	6.5	7.9	25.1	20.3	5.3	-3.4	1	6	6	3
1596	1854	5	2	19	1618	647	14.4	6.5	7.9	25.1	20.3	5.3	-3.4	0	4	3	3
1597	1854	6	3	76	1619	647	15.7	14.4	7.9	29.8	25.1	6.3	5.3	0	3	1	1
1598	1854	6	3	76	1620	647	15.7	14.4	7.9	29.8	25.1	6.3	5.3	0	4	1	2
1599	1854	6	3	76	1621	647	15.7	14.4	7.9	29.8	25.1	6.3	5.3	1	4	1	2
1600	1854	6	3	76	1622	647	15.7	14.4	7.9	29.8	25.1	6.3	5.3	1	3	2	2
1601	1854	6	3	76	1623	647	15.7	14.4	7.9	29.8	25.1	6.3	5.3	1	3	2	2
1602	1854	6	3	76	1624	647	15.7	14.4	7.9	29.8	25.1	6.3	5.3	0	4	2	2
1603	1854	6	3	76	1625	647	15.7	14.4	7.9	29.8	25.1	6.3	5.3	1	6	2	2
1604	1854	6	3	76	1626	647	15.7	14.4	7.9	29.8	25.1	6.3	5.3	0	6	2	2
1605	1854	6	3	76	1627	647	15.7	14.4	7.9	29.8	25.1	6.3	5.3	0	6	2	2
1606	1854	6	3	76	1628	647	15.7	14.4	7.9	29.8	25.1	6.3	5.3	1	3	3	3
1607	1854	6	3	76	1629	647	15.7	14.4	7.9	29.8	25.1	6.3	5.3	0	6	3	3
1608	1854	6	3	76	1630	647	15.7	14.4	7.9	29.8	25.1	6.3	5.3	0	3	3	3
1609	1854	6	3	76	1631	647	15.7	14.4	7.9	29.8	25.1	6.3	5.3	0	3	3	3
1610	1854	6	3	76	1632	647	15.7	14.4	7.9	29.8	25.1	6.3	5.3	1	4	3	3
1611	1854	6	3	76	1633	647	15.7	14.4	7.9	29.8	25.1	6.3	5.3	0	3	4	3
1612	1854	6	3	76	1634	647	15.7	14.4	7.9	29.8	25.1	6.3	5.3	0	4	4	3
1613	1854	6	3	76	1635	647	15.7	14.4	7.9	29.8	25.1	6.3	5.3	0	6	4	3
1614	1854	6	3	76	1636	647	15.7	14.4	7.9	29.8	25.1	6.3	5.3	1	4	5	3
1615	1854	6	3	76	1637	647	15.7	14.4	7.9	29.8	25.1	6.3	5.3	1	6	5	3
1616	1854	6	3	76	1638	647	15.7	14.4	7.9	29.8	25.1	6.3	5.3	0	3	5	3
1617	1854	6	3	76	1639	647	15.7	14.4	7.9	29.8	25.1	6.3	5.3	1	3	5	3
1618	1854	6	3	76	1640	647	15.7	14.4	7.9	29.8	25.1	6.3	5.3	1	4	5	3
1619	1854	6	3	76	1641	647	15.7	14.4	7.9	29.8	25.1	6.3	5.3	1	3	6	3
1620	1854	6	3	76	1642	647	15.7	14.4	7.9	29.8	25.1	6.3	5.3	0	3	6	3
1621	1854	7	3	148	1643	647	19.2	15.7	7.9	31	29.8	11.8	6.3	1	4	1	2
1622	1854	7	3	148	1644	647	19.2	15.7	7.9	31	29.8	11.8	6.3	1	6	2	2
1623	1854	7	3	148	1645	647	19.2	15.7	7.9	31	29.8	11.8	6.3	0	3	2	2
1624	1854	7	3	148	1646	647	19.2	15.7	7.9	31	29.8	11.8	6.3	0	6	2	2
1625	1854	7	3	148	1647	647	19.2	15.7	7.9	31	29.8	11.8	6.3	0	1	3	3
1626	1854	7	3	148	1648	647	19.2	15.7	7.9	31	29.8	11.8	6.3	0	5	3	3
1627	1854	7	3	148	1649	647	19.2	15.7	7.9	31	29.8	11.8	6.3	1	6	4	3
1628	1854	7	3	148	1650	647	19.2	15.7	7.9	31	29.8	11.8	6.3	1	3	4	3
1629	1854	7	3	148	1651	647	19.2	15.7	7.9	31	29.8	11.8	6.3	1	1	4	3
1630	1854	7	3	148	1652	647	19.2	15.7	7.9	31	29.8	11.8	6.3	0	3	5	3
1631	1854	7	3	148	1653	647	19.2	15.7	7.9	31	29.8	11.8	6.3	1	3	5	3
1632	1854	7	3	148	1654	647	19.2	15.7	7.9	31	29.8	11.8	6.3	0	6	5	3
1633	1854	7	3	148	1655	647	19.2	15.7	7.9	31	29.8	11.8	6.3	0	3	5	3
1634	1854	7	3	148	1656	647	19.2	15.7	7.9	31	29.8	11.8	6.3	1	6	5	3
1635	1854	7	3	148	1657	647	19.2	15.7	7.9	31	29.8	11.8	6.3	0	3	5	3
1636	1854	7	3	148	1658	647	19.2	15.7	7.9	31	29.8	11.8	6.3	1	4	5	3
1637	1854	7	3	148	1659	647	19.2	15.7	7.9	31	29.8	11.8	6.3	0	4	5	3
1638	1854	7	3	148	1660	647	19.2	15.7	7.9	31	29.8	11.8	6.3	0	3	5	3
1639	1854	7	3	148	1661	647	19.2	15.7	7.9	31	29.8	11.8	6.3	0	6	5	3
1640	1854	7	3	148	1662	647	19.2	15.7	7.9	31	29.8	11.8	6.3	0	3	5	3
1641	1854	8	3	109	1663	647	16.8	19.2	7.9	27.5	31	11.3	11.8	1	3	1	1
1642	1854	8	3	109	1664	647	16.8	19.2	7.9	27.5	31	11.3	11.8	0	3	1	2
1643	1854	8	3	109	1665	647	16.8	19.2	7.9	27.5	31	11.3	11.8	0	3	1	2
1644	1854	8	3	109	1666	647	16.8	19.2	7.9	27.5	31	11.3	11.8	1	6	1	2
1645	1854	8	3	109	1667	647	16.8	19.2	7.9	27.5	31	11.3	11.8	1	3	1	2
1646	1854	8	3	109	1668	647	16.8	19.2	7.9	27.5	31	11.3	11.8	0	6	2	2
1647	1854	8	3	109	1669	647	16.8	19.2	7.9	27.5	31	11.3	11.8	1	4	2	2
1648	1854	8	3	109	1670	647	16.8	19.2	7.9	27.5	31	11.3	11.8	0	6	2	2
1649	1854	8	3	109	1671	647	16.8	19.2	7.9	27.5	31	11.3	11.8	0	6	2	2
1650	1854	8	3	109	1672	647	16.8	19.2	7.9	27.5	31	11.3	11.8	0	6	2	2
1651	1854	8	3	109	1673	647	16.8	19.2	7.9	27.5	31	11.3	11.8	0	4	2	2
1652	1854	8	3	109	1674	647	16.8	19.2	7.9	27.5	31	11.3	11.8	1	4	2	2
1653	1854	8	3	109	1675	647	16.8	19.2	7.9	27.5	31	11.3	11.8	1	6	3	3
1654	1854	8	3	109	1676	647	16.8	19.2	7.9	27.5	31	11.3	11.8	1	4	4	3
1655	1854	8	3	109	1677	647	16.8	19.2	7.9	27.5	31	11.3	11.8	1	3	4	3
1656	1854	8	3	109	1678	647	16.8	19.2	7.9	27.5	31	11.3	11.8	0	6	4	3
1657	1854	8	3	109	1679	647	16.8	19.2	7.9	27.5	31	11.3	11.8	1	3	5	3
1658	1854	8	3	109	1680	647	16.8	19.2	7.9	27.5	31	11.3	11.8	1	4	5	3
1659	1854	8	3	109	1681	647	16.8	19.2	7.9	27.5	31	11.3	11.8	1	6	5	3
1660	1854	8	3	109	1682	647	16.8	19.2	7.9	27.5	31	11.3	11.8	0	4	5	3
1661	1854	8	3	109	1683	647	16.8	19.2	7.9	27.5	31	11.3	11.8	1	4	5	3
1662	1854	8	3	109	1684	647	16.8	19.2	7.9	27.5	31	11.3	11.8	0	6	5	3
1663	1854	8	3	109	1685	647	16.8	19.2	7.9	27.5	31	11.3	11.8	1	4	6	3
1664	1854	9	4	17	1686	647	12.5	16.8	7.9	24.6	27.5	3	11.3	0	3	1	2
1665	1854	9	4	17	1687	647	12.5	16.8	7.9	24.6	27.5	3	11.3	1	1	1	2
1666	1854	9	4	17	1688	647	12.5	16.8	7.9	24.6	27.5	3	11.3	0	3	2	2
1667	1854	9	4	17	1689	647	12.5	16.8	7.9	24.6	27.5	3	11.3	0	6	2	2
1668	1854	9	4	17	1690	647	12.5	16.8	7.9	24.6	27.5	3	11.3	1	1	3	3
1669	1854	9	4	17	1691	647	12.5	16.8	7.9	24.6	27.5	3	11.3	1	1	3	3
1670	1854	9	4	17	1692	647	12.5	16.8	7.9	24.6	27.5	3	11.3	0	3	3	3
1671	1854	9	4	17	1693	647	12.5	16.8	7.9	24.6	27.5	3	11.3	1	3	3	3
1672	1854	9	4	17	1694	647	12.5	16.8	7.9	24.6	27.5	3	11.3	1	3	3	3
1673	1854	9	4	17	1695	647	12.5	16.8	7.9	24.6	27.5	3	11.3	0	4	3	3
1674	1854	9	4	17	1696	647	12.5	16.8	7.9	24.6	27.5	3	11.3	1	4	4	3
1675	1854	9	4	17	1697	647	12.5	16.8	7.9	24.6	27.5	3	11.3	1	3	5	3
1676	1854	9	4	17	1698	647	12.5	16.8	7.9	24.6	27.5	3	11.3	0	4	5	3
1677	1854	9	4	17	1699	647	12.5	16.8	7.9	24.6	27.5	3	11.3	0	6	5	3
1678	1854	9	4	17	1700	647	12.5	16.8	7.9	24.6	27.5	3	11.3	0	6	5	3
1679	1854	9	4	17	1701	647	12.5	16.8	7.9	24.6	27.5	3	11.3	1	4	5	3
1680	1854	9	4	17	1702	647	12.5	16.8	7.9	24.6	27.5	3	11.3	0	6	5	3
1681	1854	9	4	17	1703	647	12.5	16.8	7.9	24.6	27.5	3	11.3	1	3	5	3
1682	1854	9	4	17	1704	647	12.5	16.8	7.9	24.6	27.5	3	11.3	1	4	5	3
1683	1854	9	4	17	1705	647	12.5	16.8	7.9	24.6	27.5	3	11.3	0	4	5	3
1684	1854	9	4	17	1706	647	12.5	16.8	7.9	24.6	27.5	3	11.3	0	4	6	3
1685	1854	9	4	17	1707	647	12.5	16.8	7.9	24.6	27.5	3	11.3	1	4	6	3
1686	1854	9	4	17	1708	647	12.5	16.8	7.9	24.6	27.5	3	11.3	0	1	6	3
1687	1854	9	4	17	1709	647	12.5	16.8	7.9	24.6	27.5	3	11.3	1	6	6	3
1688	1854	9	4	17	1710	647	12.5	16.8	7.9	24.6	27.5	3	11.3	1	4	6	3
1689	1854	10	4	18	1711	647	8.7	12.5	7.9	19.9	24.6	-0.5	3	1	3	2	2
1690	1854	10	4	18	1712	647	8.7	12.5	7.9	19.9	24.6	-0.5	3	0	6	2	2
1691	1854	10	4	18	1713	647	8.7	12.5	7.9	19.9	24.6	-0.5	3	0	3	2	2
1692	1854	10	4	18	1714	647	8.7	12.5	7.9	19.9	24.6	-0.5	3	0	3	2	2
1693	1854	10	4	18	1715	647	8.7	12.5	7.9	19.9	24.6	-0.5	3	1	1	2	2
1694	1854	10	4	18	1716	647	8.7	12.5	7.9	19.9	24.6	-0.5	3	1	6	2	2
1695	1854	10	4	18	1717	647	8.7	12.5	7.9	19.9	24.6	-0.5	3	0	3	3	3
1696	1854	10	4	18	1718	647	8.7	12.5	7.9	19.9	24.6	-0.5	3	1	6	3	3
1697	1854	10	4	18	1719	647	8.7	12.5	7.9	19.9	24.6	-0.5	3	0	3	3	3
1698	1854	10	4	18	1720	647	8.7	12.5	7.9	19.9	24.6	-0.5	3	0	1	4	3
1699	1854	10	4	18	1721	647	8.7	12.5	7.9	19.9	24.6	-0.5	3	1	3	4	3
1700	1854	10	4	18	1722	647	8.7	12.5	7.9	19.9	24.6	-0.5	3	0	3	4	3
1701	1854	10	4	18	1723	647	8.7	12.5	7.9	19.9	24.6	-0.5	3	0	3	4	3
1702	1854	10	4	18	1724	647	8.7	12.5	7.9	19.9	24.6	-0.5	3	0	6	4	3
1703	1854	10	4	18	1725	647	8.7	12.5	7.9	19.9	24.6	-0.5	3	0	6	5	3
1704	1854	10	4	18	1726	647	8.7	12.5	7.9	19.9	24.6	-0.5	3	1	3	5	3
1705	1854	10	4	18	1727	647	8.7	12.5	7.9	19.9	24.6	-0.5	3	1	3	5	3
1706	1854	10	4	18	1728	647	8.7	12.5	7.9	19.9	24.6	-0.5	3	1	4	5	3
1707	1854	10	4	18	1729	647	8.7	12.5	7.9	19.9	24.6	-0.5	3	1	3	5	3
1708	1854	10	4	18	1730	647	8.7	12.5	7.9	19.9	24.6	-0.5	3	0	4	5	3
1709	1854	10	4	18	1731	647	8.7	12.5	7.9	19.9	24.6	-0.5	3	1	1	5	3
1710	1854	10	4	18	1732	647	8.7	12.5	7.9	19.9	24.6	-0.5	3	0	3	5	3
1711	1854	10	4	18	1733	647	8.7	12.5	7.9	19.9	24.6	-0.5	3	0	3	5	3
1712	1854	10	4	18	1734	647	8.7	12.5	7.9	19.9	24.6	-0.5	3	0	6	5	3
1713	1854	10	4	18	1735	647	8.7	12.5	7.9	19.9	24.6	-0.5	3	0	4	5	3
1714	1854	10	4	18	1736	647	8.7	12.5	7.9	19.9	24.6	-0.5	3	1	3	6	3
1715	1854	10	4	18	1737	647	8.7	12.5	7.9	19.9	24.6	-0.5	3	0	3	6	3
1716	1854	10	4	18	1738	647	8.7	12.5	7.9	19.9	24.6	-0.5	3	0	3	6	3
1717	1854	10	4	18	1739	647	8.7	12.5	7.9	19.9	24.6	-0.5	3	0	3	6	3
1718	1854	10	4	18	1740	647	8.7	12.5	7.9	19.9	24.6	-0.5	3	1	3	6	3
1719	1854	11	4	68	1741	647	0.5	8.7	7.9	9.1	19.9	-7.4	-0.5	0	3	1	2
1720	1854	11	4	68	1742	647	0.5	8.7	7.9	9.1	19.9	-7.4	-0.5	0	3	1	2
1721	1854	11	4	68	1743	647	0.5	8.7	7.9	9.1	19.9	-7.4	-0.5	0	1	2	2
1722	1854	11	4	68	1744	647	0.5	8.7	7.9	9.1	19.9	-7.4	-0.5	1	6	2	2
1723	1854	11	4	68	1745	647	0.5	8.7	7.9	9.1	19.9	-7.4	-0.5	0	6	3	3
1724	1854	11	4	68	1746	647	0.5	8.7	7.9	9.1	19.9	-7.4	-0.5	1	6	3	3
1725	1854	11	4	68	1747	647	0.5	8.7	7.9	9.1	19.9	-7.4	-0.5	0	4	3	3
1726	1854	11	4	68	1748	647	0.5	8.7	7.9	9.1	19.9	-7.4	-0.5	0	3	3	3
1727	1854	11	4	68	1749	647	0.5	8.7	7.9	9.1	19.9	-7.4	-0.5	1	3	3	3
1728	1854	11	4	68	1750	647	0.5	8.7	7.9	9.1	19.9	-7.4	-0.5	1	3	3	3
1729	1854	11	4	68	1751	647	0.5	8.7	7.9	9.1	19.9	-7.4	-0.5	1	3	3	3
1730	1854	11	4	68	1752	647	0.5	8.7	7.9	9.1	19.9	-7.4	-0.5	1	4	3	3
1731	1854	11	4	68	1753	647	0.5	8.7	7.9	9.1	19.9	-7.4	-0.5	1	6	3	3
1732	1854	11	4	68	1754	647	0.5	8.7	7.9	9.1	19.9	-7.4	-0.5	0	6	3	3
1733	1854	11	4	68	1755	647	0.5	8.7	7.9	9.1	19.9	-7.4	-0.5	1	3	3	3
1734	1854	11	4	68	1756	647	0.5	8.7	7.9	9.1	19.9	-7.4	-0.5	0	6	3	3
1735	1854	11	4	68	1757	647	0.5	8.7	7.9	9.1	19.9	-7.4	-0.5	1	3	4	3
1736	1854	11	4	68	1758	647	0.5	8.7	7.9	9.1	19.9	-7.4	-0.5	1	3	4	3
1737	1854	11	4	68	1759	647	0.5	8.7	7.9	9.1	19.9	-7.4	-0.5	0	6	4	3
1738	1854	11	4	68	1760	647	0.5	8.7	7.9	9.1	19.9	-7.4	-0.5	1	6	4	3
1739	1854	11	4	68	1761	647	0.5	8.7	7.9	9.1	19.9	-7.4	-0.5	1	4	6	3
1740	1854	11	4	68	1762	647	0.5	8.7	7.9	9.1	19.9	-7.4	-0.5	1	3	5	3
1741	1854	11	4	68	1763	647	0.5	8.7	7.9	9.1	19.9	-7.4	-0.5	1	3	5	3
1742	1854	11	4	68	1764	647	0.5	8.7	7.9	9.1	19.9	-7.4	-0.5	0	4	5	3
1743	1854	11	4	68	1765	647	0.5	8.7	7.9	9.1	19.9	-7.4	-0.5	0	3	5	3
1744	1854	11	4	68	1766	647	0.5	8.7	7.9	9.1	19.9	-7.4	-0.5	0	4	5	3
1745	1854	11	4	68	1767	647	0.5	8.7	7.9	9.1	19.9	-7.4	-0.5	0	6	5	3
1746	1854	11	4	68	1768	647	0.5	8.7	7.9	9.1	19.9	-7.4	-0.5	1	3	5	3
1747	1854	11	4	68	1769	647	0.5	8.7	7.9	9.1	19.9	-7.4	-0.5	0	3	5	3
1748	1854	11	4	68	1770	647	0.5	8.7	7.9	9.1	19.9	-7.4	-0.5	0	6	6	3
1749	1854	11	4	68	1771	647	0.5	8.7	7.9	9.1	19.9	-7.4	-0.5	0	4	6	3
1750	1854	12	1	75	1772	647	1	0.5	7.9	6.3	9.1	-6	-7.4	0	3	1	1
1751	1854	12	1	75	1773	647	1	0.5	7.9	6.3	9.1	-6	-7.4	0	4	1	2
1752	1854	12	1	75	1774	647	1	0.5	7.9	6.3	9.1	-6	-7.4	0	3	2	2
1753	1854	12	1	75	1775	647	1	0.5	7.9	6.3	9.1	-6	-7.4	1	4	2	2
1754	1854	12	1	75	1776	647	1	0.5	7.9	6.3	9.1	-6	-7.4	1	1	2	2
1755	1854	12	1	75	1777	647	1	0.5	7.9	6.3	9.1	-6	-7.4	0	3	2	2
1756	1854	12	1	75	1778	647	1	0.5	7.9	6.3	9.1	-6	-7.4	0	3	2	2
1757	1854	12	1	75	1779	647	1	0.5	7.9	6.3	9.1	-6	-7.4	0	4	2	2
1758	1854	12	1	75	1780	647	1	0.5	7.9	6.3	9.1	-6	-7.4	1	4	2	2
1759	1854	12	1	75	1781	647	1	0.5	7.9	6.3	9.1	-6	-7.4	1	4	2	2
1760	1854	12	1	75	1782	647	1	0.5	7.9	6.3	9.1	-6	-7.4	0	4	2	2
1761	1854	12	1	75	1783	647	1	0.5	7.9	6.3	9.1	-6	-7.4	0	4	2	2
1762	1854	12	1	75	1784	647	1	0.5	7.9	6.3	9.1	-6	-7.4	0	3	3	3
1763	1854	12	1	75	1785	647	1	0.5	7.9	6.3	9.1	-6	-7.4	1	6	3	3
1764	1854	12	1	75	1786	647	1	0.5	7.9	6.3	9.1	-6	-7.4	0	1	3	3
1765	1854	12	1	75	1787	647	1	0.5	7.9	6.3	9.1	-6	-7.4	1	3	3	3
1766	1854	12	1	75	1788	647	1	0.5	7.9	6.3	9.1	-6	-7.4	1	3	3	3
1767	1854	12	1	75	1789	647	1	0.5	7.9	6.3	9.1	-6	-7.4	1	3	3	3
1768	1854	12	1	75	1790	647	1	0.5	7.9	6.3	9.1	-6	-7.4	1	6	3	3
1769	1854	12	1	75	1791	647	1	0.5	7.9	6.3	9.1	-6	-7.4	0	4	3	3
1770	1854	12	1	75	1792	647	1	0.5	7.9	6.3	9.1	-6	-7.4	1	3	4	3
1771	1854	12	1	75	1793	647	1	0.5	7.9	6.3	9.1	-6	-7.4	1	3	4	3
1772	1854	12	1	75	1794	647	1	0.5	7.9	6.3	9.1	-6	-7.4	1	3	4	3
1773	1854	12	1	75	1795	647	1	0.5	7.9	6.3	9.1	-6	-7.4	1	3	5	3
1774	1854	12	1	75	1796	647	1	0.5	7.9	6.3	9.1	-6	-7.4	0	3	5	3
1775	1854	12	1	75	1797	647	1	0.5	7.9	6.3	9.1	-6	-7.4	0	4	5	3
1776	1854	12	1	75	1798	647	1	0.5	7.9	6.3	9.1	-6	-7.4	0	3	5	3
1777	1854	12	1	75	1799	647	1	0.5	7.9	6.3	9.1	-6	-7.4	0	4	5	3
1778	1854	12	1	75	1800	647	1	0.5	7.9	6.3	9.1	-6	-7.4	0	4	5	3
1779	1854	12	1	75	1801	647	1	0.5	7.9	6.3	9.1	-6	-7.4	1	1	6	3
1780	1854	12	1	75	1802	647	1	0.5	7.9	6.3	9.1	-6	-7.4	1	3	6	3
1781	1854	12	1	75	1803	647	1	0.5	7.9	6.3	9.1	-6	-7.4	0	4	6	3
1782	1854	12	1	75	1804	647	1	0.5	7.9	6.3	9.1	-6	-7.4	1	6	6	3
1783	1854	12	1	75	1805	647	1	0.5	7.9	6.3	9.1	-6	-7.4	0	1	6	3
1784	1854	12	1	75	1806	647	1	0.5	7.9	6.3	9.1	-6	-7.4	0	6	6	3
1785	1854	12	1	75	1807	647	1	0.5	7.9	6.3	9.1	-6	-7.4	0	6	6	3
1786	1854	12	1	75	1808	647	1	0.5	7.9	6.3	9.1	-6	-7.4	0	6	6	3
1787	1855	1	1	42	1809	498	-4	1	6.1	5.5	6.3	-18.8	-6	1	5	1	2
1788	1855	1	1	42	1810	498	-4	1	6.1	5.5	6.3	-18.8	-6	0	4	1	1
1789	1855	1	1	42	1811	498	-4	1	6.1	5.5	6.3	-18.8	-6	1	4	1	1
1790	1855	1	1	42	1812	498	-4	1	6.1	5.5	6.3	-18.8	-6	1	4	1	2
1791	1855	1	1	42	1813	498	-4	1	6.1	5.5	6.3	-18.8	-6	1	4	1	2
1792	1855	1	1	42	1814	498	-4	1	6.1	5.5	6.3	-18.8	-6	0	6	1	2
1793	1855	1	1	42	1815	498	-4	1	6.1	5.5	6.3	-18.8	-6	0	4	1	1
1794	1855	1	1	42	1816	498	-4	1	6.1	5.5	6.3	-18.8	-6	1	4	1	1
1795	1855	1	1	42	1817	498	-4	1	6.1	5.5	6.3	-18.8	-6	1	1	1	2
1796	1855	1	1	42	1818	498	-4	1	6.1	5.5	6.3	-18.8	-6	1	5	2	2
1797	1855	1	1	42	1819	498	-4	1	6.1	5.5	6.3	-18.8	-6	0	1	2	2
1798	1855	1	1	42	1820	498	-4	1	6.1	5.5	6.3	-18.8	-6	1	1	2	2
1799	1855	1	1	42	1821	498	-4	1	6.1	5.5	6.3	-18.8	-6	0	1	2	2
1800	1855	1	1	42	1822	498	-4	1	6.1	5.5	6.3	-18.8	-6	0	1	2	2
1801	1855	1	1	42	1823	498	-4	1	6.1	5.5	6.3	-18.8	-6	0	1	2	2
1802	1855	1	1	42	1824	498	-4	1	6.1	5.5	6.3	-18.8	-6	0	1	2	2
1803	1855	1	1	42	1825	498	-4	1	6.1	5.5	6.3	-18.8	-6	0	1	2	2
1804	1855	1	1	42	1826	498	-4	1	6.1	5.5	6.3	-18.8	-6	0	2	2	2
1805	1855	1	1	42	1827	498	-4	1	6.1	5.5	6.3	-18.8	-6	1	2	2	2
1806	1855	1	1	42	1828	498	-4	1	6.1	5.5	6.3	-18.8	-6	0	2	2	2
1807	1855	1	1	42	1829	498	-4	1	6.1	5.5	6.3	-18.8	-6	1	2	2	2
1808	1855	1	1	42	1830	498	-4	1	6.1	5.5	6.3	-18.8	-6	0	3	2	2
1809	1855	1	1	42	1831	498	-4	1	6.1	5.5	6.3	-18.8	-6	0	5	2	2
1810	1855	1	1	42	1832	498	-4	1	6.1	5.5	6.3	-18.8	-6	0	5	2	2
1811	1855	1	1	42	1833	498	-4	1	6.1	5.5	6.3	-18.8	-6	1	5	2	2
1812	1855	1	1	42	1834	498	-4	1	6.1	5.5	6.3	-18.8	-6	1	5	2	2
1813	1855	1	1	42	1835	498	-4	1	6.1	5.5	6.3	-18.8	-6	1	4	2	2
1814	1855	1	1	42	1836	498	-4	1	6.1	5.5	6.3	-18.8	-6	0	4	2	2
1815	1855	1	1	42	1837	498	-4	1	6.1	5.5	6.3	-18.8	-6	0	4	2	2
1816	1855	1	1	42	1838	498	-4	1	6.1	5.5	6.3	-18.8	-6	0	4	2	2
1817	1855	1	1	42	1839	498	-4	1	6.1	5.5	6.3	-18.8	-6	1	4	2	2
1818	1855	1	1	42	1840	498	-4	1	6.1	5.5	6.3	-18.8	-6	0	4	3	3
1819	1855	1	1	42	1841	498	-4	1	6.1	5.5	6.3	-18.8	-6	1	1	3	3
1820	1855	1	1	42	1842	498	-4	1	6.1	5.5	6.3	-18.8	-6	0	1	3	3
1821	1855	1	1	42	1843	498	-4	1	6.1	5.5	6.3	-18.8	-6	0	1	3	3
1822	1855	1	1	42	1844	498	-4	1	6.1	5.5	6.3	-18.8	-6	1	4	3	3
1823	1855	1	1	42	1845	498	-4	1	6.1	5.5	6.3	-18.8	-6	0	4	3	3
1824	1855	1	1	42	1846	498	-4	1	6.1	5.5	6.3	-18.8	-6	0	4	3	3
1825	1855	1	1	42	1847	498	-4	1	6.1	5.5	6.3	-18.8	-6	0	4	3	3
1826	1855	1	1	42	1848	498	-4	1	6.1	5.5	6.3	-18.8	-6	0	4	3	3
1827	1855	1	1	42	1849	498	-4	1	6.1	5.5	6.3	-18.8	-6	1	4	3	3
1828	1855	1	1	42	1850	498	-4	1	6.1	5.5	6.3	-18.8	-6	1	5	3	3
1829	1855	1	1	42	1851	498	-4	1	6.1	5.5	6.3	-18.8	-6	0	4	3	3
1830	1855	1	1	42	1852	498	-4	1	6.1	5.5	6.3	-18.8	-6	0	4	3	3
1831	1855	1	1	42	1853	498	-4	1	6.1	5.5	6.3	-18.8	-6	0	1	3	3
1832	1855	1	1	42	1854	498	-4	1	6.1	5.5	6.3	-18.8	-6	1	5	3	3
1833	1855	1	1	42	1855	498	-4	1	6.1	5.5	6.3	-18.8	-6	1	5	3	3
1834	1855	1	1	42	1856	498	-4	1	6.1	5.5	6.3	-18.8	-6	1	5	3	3
1835	1855	1	1	42	1857	498	-4	1	6.1	5.5	6.3	-18.8	-6	0	3	3	3
1836	1855	1	1	42	1858	498	-4	1	6.1	5.5	6.3	-18.8	-6	1	3	3	3
1837	1855	1	1	42	1859	498	-4	1	6.1	5.5	6.3	-18.8	-6	0	3	3	3
1838	1855	1	1	42	1860	498	-4	1	6.1	5.5	6.3	-18.8	-6	0	3	3	3
1839	1855	1	1	42	1861	498	-4	1	6.1	5.5	6.3	-18.8	-6	1	1	3	3
1840	1855	1	1	42	1862	498	-4	1	6.1	5.5	6.3	-18.8	-6	1	4	3	3
1841	1855	1	1	42	1863	498	-4	1	6.1	5.5	6.3	-18.8	-6	1	1	3	3
1842	1855	1	1	42	1864	498	-4	1	6.1	5.5	6.3	-18.8	-6	1	1	3	3
1843	1855	1	1	42	1865	498	-4	1	6.1	5.5	6.3	-18.8	-6	0	4	3	3
1844	1855	1	1	42	1866	498	-4	1	6.1	5.5	6.3	-18.8	-6	0	4	3	3
1845	1855	1	1	42	1867	498	-4	1	6.1	5.5	6.3	-18.8	-6	0	4	3	3
1846	1855	1	1	42	1868	498	-4	1	6.1	5.5	6.3	-18.8	-6	0	1	4	3
1847	1855	1	1	42	1869	498	-4	1	6.1	5.5	6.3	-18.8	-6	0	1	4	3
1848	1855	1	1	42	1870	498	-4	1	6.1	5.5	6.3	-18.8	-6	1	1	4	3
1849	1855	1	1	42	1871	498	-4	1	6.1	5.5	6.3	-18.8	-6	0	1	4	3
1850	1855	1	1	42	1872	498	-4	1	6.1	5.5	6.3	-18.8	-6	0	1	4	3
1851	1855	1	1	42	1873	498	-4	1	6.1	5.5	6.3	-18.8	-6	0	5	4	3
1852	1855	1	1	42	1874	498	-4	1	6.1	5.5	6.3	-18.8	-6	0	3	4	3
1853	1855	1	1	42	1875	498	-4	1	6.1	5.5	6.3	-18.8	-6	0	4	4	3
1854	1855	1	1	42	1876	498	-4	1	6.1	5.5	6.3	-18.8	-6	1	3	4	3
1855	1855	1	1	42	1877	498	-4	1	6.1	5.5	6.3	-18.8	-6	1	4	4	3
1856	1855	1	1	42	1878	498	-4	1	6.1	5.5	6.3	-18.8	-6	1	5	4	3
1857	1855	1	1	42	1879	498	-4	1	6.1	5.5	6.3	-18.8	-6	0	5	4	3
1858	1855	1	1	42	1880	498	-4	1	6.1	5.5	6.3	-18.8	-6	1	5	4	3
1859	1855	1	1	42	1881	498	-4	1	6.1	5.5	6.3	-18.8	-6	0	5	4	3
1860	1855	1	1	42	1882	498	-4	1	6.1	5.5	6.3	-18.8	-6	0	4	4	3
1861	1855	1	1	42	1883	498	-4	1	6.1	5.5	6.3	-18.8	-6	1	4	4	3
1862	1855	1	1	42	1884	498	-4	1	6.1	5.5	6.3	-18.8	-6	1	4	4	3
1863	1855	1	1	42	1885	498	-4	1	6.1	5.5	6.3	-18.8	-6	0	4	4	3
1864	1855	1	1	42	1886	498	-4	1	6.1	5.5	6.3	-18.8	-6	0	1	4	3
1865	1855	1	1	42	1887	498	-4	1	6.1	5.5	6.3	-18.8	-6	0	1	5	3
1866	1855	1	1	42	1888	498	-4	1	6.1	5.5	6.3	-18.8	-6	1	1	5	3
1867	1855	1	1	42	1889	498	-4	1	6.1	5.5	6.3	-18.8	-6	0	1	5	3
1868	1855	1	1	42	1890	498	-4	1	6.1	5.5	6.3	-18.8	-6	1	4	5	3
1869	1855	1	1	42	1891	498	-4	1	6.1	5.5	6.3	-18.8	-6	0	5	5	3
1870	1855	1	1	42	1892	498	-4	1	6.1	5.5	6.3	-18.8	-6	1	1	5	3
1871	1855	1	1	42	1893	498	-4	1	6.1	5.5	6.3	-18.8	-6	0	1	5	3
1872	1855	1	1	42	1894	498	-4	1	6.1	5.5	6.3	-18.8	-6	0	4	5	3
1873	1855	1	1	42	1895	498	-4	1	6.1	5.5	6.3	-18.8	-6	0	4	5	3
1874	1855	1	1	42	1896	498	-4	1	6.1	5.5	6.3	-18.8	-6	0	4	5	3
1875	1855	1	1	42	1897	498	-4	1	6.1	5.5	6.3	-18.8	-6	1	4	5	3
1876	1855	1	1	42	1898	498	-4	1	6.1	5.5	6.3	-18.8	-6	1	4	5	3
1877	1855	1	1	42	1899	498	-4	1	6.1	5.5	6.3	-18.8	-6	1	4	5	3
1878	1855	1	1	42	1900	498	-4	1	6.1	5.5	6.3	-18.8	-6	0	4	5	3
1879	1855	1	1	42	1901	498	-4	1	6.1	5.5	6.3	-18.8	-6	1	6	5	3
1880	1855	1	1	42	1902	498	-4	1	6.1	5.5	6.3	-18.8	-6	0	3	5	3
1881	1855	1	1	42	1903	498	-4	1	6.1	5.5	6.3	-18.8	-6	0	4	5	3
1882	1855	1	1	42	1904	498	-4	1	6.1	5.5	6.3	-18.8	-6	0	3	5	3
1883	1855	1	1	42	1905	498	-4	1	6.1	5.5	6.3	-18.8	-6	0	3	5	3
1884	1855	1	1	42	1906	498	-4	1	6.1	5.5	6.3	-18.8	-6	1	3	5	3
1885	1855	1	1	42	1907	498	-4	1	6.1	5.5	6.3	-18.8	-6	1	4	5	3
1886	1855	1	1	42	1908	498	-4	1	6.1	5.5	6.3	-18.8	-6	0	4	5	3
1887	1855	1	1	42	1909	498	-4	1	6.1	5.5	6.3	-18.8	-6	0	3	5	3
1888	1855	1	1	42	1910	498	-4	1	6.1	5.5	6.3	-18.8	-6	1	4	5	3
1889	1855	1	1	42	1911	498	-4	1	6.1	5.5	6.3	-18.8	-6	1	4	5	3
1890	1855	1	1	42	1912	498	-4	1	6.1	5.5	6.3	-18.8	-6	1	1	6	3
1891	1855	1	1	42	1913	498	-4	1	6.1	5.5	6.3	-18.8	-6	0	4	6	3
1892	1855	1	1	42	1914	498	-4	1	6.1	5.5	6.3	-18.8	-6	1	3	6	3
1893	1855	1	1	42	1915	498	-4	1	6.1	5.5	6.3	-18.8	-6	1	3	6	3
1894	1855	1	1	42	1916	498	-4	1	6.1	5.5	6.3	-18.8	-6	0	4	6	3
1895	1855	1	1	42	1917	498	-4	1	6.1	5.5	6.3	-18.8	-6	1	4	6	3
1896	1855	1	1	42	1918	498	-4	1	6.1	5.5	6.3	-18.8	-6	1	4	6	3
1897	1855	1	1	42	1919	498	-4	1	6.1	5.5	6.3	-18.8	-6	1	4	6	3
1898	1855	1	1	42	1920	498	-4	1	6.1	5.5	6.3	-18.8	-6	1	1	6	3
1899	1855	1	1	42	1921	498	-4	1	6.1	5.5	6.3	-18.8	-6	0	4	3	3
1900	1855	1	1	42	1922	498	-4	1	6.1	5.5	6.3	-18.8	-6	0	1	6	3
1901	1855	1	1	42	1923	498	-4	1	6.1	5.5	6.3	-18.8	-6	1	3	3	3
1902	1855	1	1	42	1924	498	-4	1	6.1	5.5	6.3	-18.8	-6	1	5	6	3
1903	1855	2	1	20	1925	498	-10.3	-4	6.1	2.3	5.5	-26.3	-18.8	0	4	1	1
1904	1855	2	1	20	1926	498	-10.3	-4	6.1	2.3	5.5	-26.3	-18.8	0	4	1	2
1905	1855	2	1	20	1927	498	-10.3	-4	6.1	2.3	5.5	-26.3	-18.8	0	1	1	2
1906	1855	2	1	20	1928	498	-10.3	-4	6.1	2.3	5.5	-26.3	-18.8	0	1	1	1
1907	1855	2	1	20	1929	498	-10.3	-4	6.1	2.3	5.5	-26.3	-18.8	0	1	1	1
1908	1855	2	1	20	1930	498	-10.3	-4	6.1	2.3	5.5	-26.3	-18.8	0	1	1	1
1909	1855	2	1	20	1931	498	-10.3	-4	6.1	2.3	5.5	-26.3	-18.8	0	1	1	1
1910	1855	2	1	20	1932	498	-10.3	-4	6.1	2.3	5.5	-26.3	-18.8	0	1	1	1
1911	1855	2	1	20	1933	498	-10.3	-4	6.1	2.3	5.5	-26.3	-18.8	1	4	1	1
1912	1855	2	1	20	1934	498	-10.3	-4	6.1	2.3	5.5	-26.3	-18.8	1	4	1	2
1913	1855	2	1	20	1935	498	-10.3	-4	6.1	2.3	5.5	-26.3	-18.8	1	5	1	2
1914	1855	2	1	20	1936	498	-10.3	-4	6.1	2.3	5.5	-26.3	-18.8	0	4	2	2
1915	1855	2	1	20	1937	498	-10.3	-4	6.1	2.3	5.5	-26.3	-18.8	0	5	2	2
1916	1855	2	1	20	1938	498	-10.3	-4	6.1	2.3	5.5	-26.3	-18.8	0	5	2	2
1917	1855	2	1	20	1939	498	-10.3	-4	6.1	2.3	5.5	-26.3	-18.8	0	5	2	2
1918	1855	2	1	20	1940	498	-10.3	-4	6.1	2.3	5.5	-26.3	-18.8	1	1	2	2
1919	1855	2	1	20	1941	498	-10.3	-4	6.1	2.3	5.5	-26.3	-18.8	0	1	2	2
1920	1855	2	1	20	1942	498	-10.3	-4	6.1	2.3	5.5	-26.3	-18.8	0	1	2	2
1921	1855	2	1	20	1943	498	-10.3	-4	6.1	2.3	5.5	-26.3	-18.8	0	1	2	2
1922	1855	2	1	20	1944	498	-10.3	-4	6.1	2.3	5.5	-26.3	-18.8	0	3	2	2
1923	1855	2	1	20	1945	498	-10.3	-4	6.1	2.3	5.5	-26.3	-18.8	1	3	2	2
1924	1855	2	1	20	1946	498	-10.3	-4	6.1	2.3	5.5	-26.3	-18.8	0	4	2	2
1925	1855	2	1	20	1947	498	-10.3	-4	6.1	2.3	5.5	-26.3	-18.8	1	4	2	2
1926	1855	2	1	20	1948	498	-10.3	-4	6.1	2.3	5.5	-26.3	-18.8	1	4	2	2
1927	1855	2	1	20	1949	498	-10.3	-4	6.1	2.3	5.5	-26.3	-18.8	0	5	2	2
1928	1855	2	1	20	1950	498	-10.3	-4	6.1	2.3	5.5	-26.3	-18.8	0	5	2	2
1929	1855	2	1	20	1951	498	-10.3	-4	6.1	2.3	5.5	-26.3	-18.8	1	5	2	2
1930	1855	2	1	20	1952	498	-10.3	-4	6.1	2.3	5.5	-26.3	-18.8	0	5	2	2
1931	1855	2	1	20	1953	498	-10.3	-4	6.1	2.3	5.5	-26.3	-18.8	1	5	2	2
1932	1855	2	1	20	1954	498	-10.3	-4	6.1	2.3	5.5	-26.3	-18.8	1	5	2	2
1933	1855	2	1	20	1955	498	-10.3	-4	6.1	2.3	5.5	-26.3	-18.8	1	5	2	2
1934	1855	2	1	20	1956	498	-10.3	-4	6.1	2.3	5.5	-26.3	-18.8	1	6	2	2
1935	1855	2	1	20	1957	498	-10.3	-4	6.1	2.3	5.5	-26.3	-18.8	1	6	2	2
1936	1855	2	1	20	1958	498	-10.3	-4	6.1	2.3	5.5	-26.3	-18.8	1	6	2	2
1937	1855	2	1	20	1959	498	-10.3	-4	6.1	2.3	5.5	-26.3	-18.8	1	6	2	2
1938	1855	2	1	20	1960	498	-10.3	-4	6.1	2.3	5.5	-26.3	-18.8	1	4	2	2
1939	1855	2	1	20	1961	498	-10.3	-4	6.1	2.3	5.5	-26.3	-18.8	0	4	2	2
1940	1855	2	1	20	1962	498	-10.3	-4	6.1	2.3	5.5	-26.3	-18.8	0	4	2	2
1941	1855	2	1	20	1963	498	-10.3	-4	6.1	2.3	5.5	-26.3	-18.8	0	4	2	2
1942	1855	2	1	20	1964	498	-10.3	-4	6.1	2.3	5.5	-26.3	-18.8	1	4	2	2
1943	1855	2	1	20	1965	498	-10.3	-4	6.1	2.3	5.5	-26.3	-18.8	0	4	2	2
1944	1855	2	1	20	1966	498	-10.3	-4	6.1	2.3	5.5	-26.3	-18.8	1	4	2	2
1945	1855	2	1	20	1967	498	-10.3	-4	6.1	2.3	5.5	-26.3	-18.8	1	4	2	2
1946	1855	2	1	20	1968	498	-10.3	-4	6.1	2.3	5.5	-26.3	-18.8	0	4	3	3
1947	1855	2	1	20	1969	498	-10.3	-4	6.1	2.3	5.5	-26.3	-18.8	0	4	3	3
1948	1855	2	1	20	1970	498	-10.3	-4	6.1	2.3	5.5	-26.3	-18.8	1	1	3	3
1949	1855	2	1	20	1971	498	-10.3	-4	6.1	2.3	5.5	-26.3	-18.8	1	1	3	3
1950	1855	2	1	20	1972	498	-10.3	-4	6.1	2.3	5.5	-26.3	-18.8	0	3	3	3
1951	1855	2	1	20	1973	498	-10.3	-4	6.1	2.3	5.5	-26.3	-18.8	0	3	3	3
1952	1855	2	1	20	1974	498	-10.3	-4	6.1	2.3	5.5	-26.3	-18.8	1	4	3	3
1953	1855	2	1	20	1975	498	-10.3	-4	6.1	2.3	5.5	-26.3	-18.8	0	4	3	3
1954	1855	2	1	20	1976	498	-10.3	-4	6.1	2.3	5.5	-26.3	-18.8	1	4	3	3
1955	1855	2	1	20	1977	498	-10.3	-4	6.1	2.3	5.5	-26.3	-18.8	1	5	3	3
1956	1855	2	1	20	1978	498	-10.3	-4	6.1	2.3	5.5	-26.3	-18.8	1	5	3	3
1957	1855	2	1	20	1979	498	-10.3	-4	6.1	2.3	5.5	-26.3	-18.8	1	1	3	3
1958	1855	2	1	20	1980	498	-10.3	-4	6.1	2.3	5.5	-26.3	-18.8	1	5	3	3
1959	1855	2	1	20	1981	498	-10.3	-4	6.1	2.3	5.5	-26.3	-18.8	1	5	3	3
1960	1855	2	1	20	1982	498	-10.3	-4	6.1	2.3	5.5	-26.3	-18.8	0	4	3	3
1961	1855	2	1	20	1983	498	-10.3	-4	6.1	2.3	5.5	-26.3	-18.8	1	1	3	3
1962	1855	2	1	20	1984	498	-10.3	-4	6.1	2.3	5.5	-26.3	-18.8	0	4	3	3
1963	1855	2	1	20	1985	498	-10.3	-4	6.1	2.3	5.5	-26.3	-18.8	0	4	3	3
1964	1855	2	1	20	1986	498	-10.3	-4	6.1	2.3	5.5	-26.3	-18.8	1	4	3	3
1965	1855	2	1	20	1987	498	-10.3	-4	6.1	2.3	5.5	-26.3	-18.8	0	1	3	3
1966	1855	2	1	20	1988	498	-10.3	-4	6.1	2.3	5.5	-26.3	-18.8	1	4	3	3
1967	1855	2	1	20	1989	498	-10.3	-4	6.1	2.3	5.5	-26.3	-18.8	1	5	3	3
1968	1855	2	1	20	1990	498	-10.3	-4	6.1	2.3	5.5	-26.3	-18.8	1	5	3	3
1969	1855	2	1	20	1991	498	-10.3	-4	6.1	2.3	5.5	-26.3	-18.8	1	3	3	3
1970	1855	2	1	20	1992	498	-10.3	-4	6.1	2.3	5.5	-26.3	-18.8	0	6	3	3
1971	1855	2	1	20	1993	498	-10.3	-4	6.1	2.3	5.5	-26.3	-18.8	1	1	3	3
1972	1855	2	1	20	1994	498	-10.3	-4	6.1	2.3	5.5	-26.3	-18.8	1	1	3	3
1973	1855	2	1	20	1995	498	-10.3	-4	6.1	2.3	5.5	-26.3	-18.8	1	1	3	3
1974	1855	2	1	20	1996	498	-10.3	-4	6.1	2.3	5.5	-26.3	-18.8	1	5	3	3
1975	1855	2	1	20	1997	498	-10.3	-4	6.1	2.3	5.5	-26.3	-18.8	0	5	3	3
1976	1855	2	1	20	1998	498	-10.3	-4	6.1	2.3	5.5	-26.3	-18.8	0	4	3	3
1977	1855	2	1	20	1999	498	-10.3	-4	6.1	2.3	5.5	-26.3	-18.8	1	4	3	3
1978	1855	2	1	20	2000	498	-10.3	-4	6.1	2.3	5.5	-26.3	-18.8	1	4	4	3
1979	1855	2	1	20	2001	498	-10.3	-4	6.1	2.3	5.5	-26.3	-18.8	1	4	4	3
1980	1855	2	1	20	2002	498	-10.3	-4	6.1	2.3	5.5	-26.3	-18.8	0	4	4	3
1981	1855	2	1	20	2003	498	-10.3	-4	6.1	2.3	5.5	-26.3	-18.8	0	4	4	3
1982	1855	2	1	20	2004	498	-10.3	-4	6.1	2.3	5.5	-26.3	-18.8	1	4	4	3
1983	1855	2	1	20	2005	498	-10.3	-4	6.1	2.3	5.5	-26.3	-18.8	1	5	4	3
1984	1855	2	1	20	2006	498	-10.3	-4	6.1	2.3	5.5	-26.3	-18.8	0	5	4	3
1985	1855	2	1	20	2007	498	-10.3	-4	6.1	2.3	5.5	-26.3	-18.8	1	1	4	3
1986	1855	2	1	20	2008	498	-10.3	-4	6.1	2.3	5.5	-26.3	-18.8	0	3	4	3
1987	1855	2	1	20	2009	498	-10.3	-4	6.1	2.3	5.5	-26.3	-18.8	0	1	4	3
1988	1855	2	1	20	2010	498	-10.3	-4	6.1	2.3	5.5	-26.3	-18.8	1	3	4	3
1989	1855	2	1	20	2011	498	-10.3	-4	6.1	2.3	5.5	-26.3	-18.8	0	3	4	3
1990	1855	2	1	20	2012	498	-10.3	-4	6.1	2.3	5.5	-26.3	-18.8	0	5	4	3
1991	1855	2	1	20	2013	498	-10.3	-4	6.1	2.3	5.5	-26.3	-18.8	0	4	4	3
1992	1855	2	1	20	2014	498	-10.3	-4	6.1	2.3	5.5	-26.3	-18.8	1	4	4	3
1993	1855	2	1	20	2015	498	-10.3	-4	6.1	2.3	5.5	-26.3	-18.8	1	4	5	3
1994	1855	2	1	20	2016	498	-10.3	-4	6.1	2.3	5.5	-26.3	-18.8	0	5	5	3
1995	1855	2	1	20	2017	498	-10.3	-4	6.1	2.3	5.5	-26.3	-18.8	1	1	5	3
1996	1855	2	1	20	2018	498	-10.3	-4	6.1	2.3	5.5	-26.3	-18.8	1	4	5	3
1997	1855	2	1	20	2019	498	-10.3	-4	6.1	2.3	5.5	-26.3	-18.8	1	1	5	3
1998	1855	2	1	20	2020	498	-10.3	-4	6.1	2.3	5.5	-26.3	-18.8	1	4	5	3
1999	1855	2	1	20	2021	498	-10.3	-4	6.1	2.3	5.5	-26.3	-18.8	0	4	5	3
[truncated: 33,007 more rows]

## Sheet: Codes
SEASON OF DEATH
1 – Winter (D, J, F)
2 – Spring (M, A, M)
3 – Summer (Jun, July, A)
4 – Autumn (S, O, N)
SEX
1 – Female
0 – Male
CITY QUARTER (division done by Police in 1866; there were distinguished 5 police stations in 1866, within the fortress)
1 – Streets around the Market Square (Neuer Market, Wasserstrasse, Graben, Breslaustr., Schulestr. Klosternstr., Jesuitenstr., Ziegenstr., Gołębia)
2 – streets outside Market square (Breite Str., Bedelica, Gross & Klein Graben, Żydowska, Wronecka, Kramaeska, Mokra, Szyperska, Szewska, Stawna, Piaskowa.
3 – streets outside Market square (St. Martin, Fischerai, Ratajczaka, Długa, Półwiejska)
4 – streets outside Market square (st. Adalbert, Burgstr., Wilhelmstr., Młyńska, Libelta)
5 – streets outside Market square (Berdychowo, Chwaliszewo, Środka, Ostrówek, Zawady (the poorest)
CAUSE OF DEATH
1 – Infectious diseases (measles, smallpox, whooping cough, cholera, dysentery, typhus, gastric fever, rash
2 – Consumption (tuberculosis)
3 – Civilization diseases (paralysis, strokes, cancer, heart disease, dropsy, old age, senility, apoplexy, suicides, homicides, accidents at work, edema)
4 – Fevers and inflamations
5 – Perinatal mortality, maternal mortality and infant mortality
6 – Other (pneumonia, headaches, etc.)
Causes of death
1 – Waterborne diseases (inc. cholera)
2 – Airborne diseases
3 – other causes of death
We work with the cause of death (classified into 3 categories, i.e. with the Excel column “1-waterborne diseases, 2-airborne diseases, 3-other causes of death”). For technical reasons, it is recoded as follows: 0=other (baseline), 1=waterborne, 2=airborne. This recoded version plays the role of the response variable (or “dependent variable”) in the models to follow.
