# Supplementary material for: Climate and disease in historical urban space: evidence from 19th century Poznań, Poland
Source: Copernicus journal article supplement (doi:10.5194/cp-20-137-2024), 2024-01-17
Supplement: Supplementary file 2 [file cp-20-137-2024-supplement.zip]

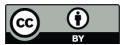

*Supplement of*

**Climate and disease in historical urban space:  
evidence from 19th century Poznań, Poland**

**Grażyna Liczbińska et al.**

*Correspondence to:* Grażyna Liczbińska ([grazyna@amu.edu.pl](mailto:grazyna@amu.edu.pl))

- [cp-20-137-2024-supplement-title-page.pdf](#)
- [Database\\_Poznan diseases & Climate.xlsx](#)
- [Supplementary Materials - Tables S1-S2.pdf](#)

The copyright of individual parts of the supplement might differ from the article licence.
