# Supplementary material for: Climate and disease in historical urban space: evidence from 19th century Poznań, Poland
Source: Copernicus journal article supplement (doi:10.5194/cp-20-137-2024), 2024-01-17
Supplement: Supplementary file 3 [file cp-20-137-2024-supplement.zip]

Archive with 3 entries (3 files):
- cp-20-137-2024-supplement-title-page.pdf
- Supplementary Materials - Tables S1-S2.pdf
- Database_PoznaΣ disaeses & Climate.xlsx
